# Supplementary material for: Mechanochemical Cu(ii) complexes and propargylamine synthetic adventures
Source: Royal Society of Chemistry journal article supplement (doi:10.1039/d3su00315a), 2024-01-01

## Supporting Information

### Mechanochemical Cu(II) complexes and propargylamine synthetic adventures

Ghadah Abdullah S Al Jomeh,<sup>a</sup> Andrew McGown,<sup>a</sup> Emma Richards,<sup>b</sup> Graham J. Tizzard,<sup>c</sup> Simon J. Coles,<sup>c</sup> Ramón González-Méndez,<sup>a</sup> Chris Dadswell,<sup>a</sup> John Spencer<sup>a</sup> and George E. Kostakis<sup>a\*</sup>

<sup>a</sup> Department of Chemistry, School of Life Sciences, University of Sussex, Brighton BN1 9QJ, UK. E-mail: [G.Kostakis@sussex.ac.uk](mailto:G.Kostakis@sussex.ac.uk),

<sup>b</sup> School of Chemistry, Main Building, Cardiff University, Cardiff CF10 3AT, Cymru/Wales, UK

<sup>c</sup> UK National Crystallography Service, Chemistry, University of Southampton, SO1 71BJ, UK.

## Contents

|                                                                        |    |
|------------------------------------------------------------------------|----|
| <b>Experimental section</b> .....                                      | 2  |
| Materials.....                                                         | 2  |
| Instrumentation.....                                                   | 2  |
| PXRD and SXR.....                                                      | 2  |
| <b>Synthesis</b> .....                                                 | 2  |
| Ligand synthesis H <sub>2</sub> L1 .....                               | 2  |
| Ligand synthesis H <sub>2</sub> L2 .....                               | 2  |
| Complex synthesis .....                                                | 10 |
| <b>PXRD</b> .....                                                      | 11 |
| <b>Elemental analyses</b> .....                                        | 12 |
| <b>Circular Dichroism</b> .....                                        | 13 |
| <b>UV-Vis</b> .....                                                    | 13 |
| <b>ESI-MS</b> .....                                                    | 14 |
| <b>EPR</b> .....                                                       | 17 |
| <b>Catalysis</b> .....                                                 | 21 |
| <b>Enantiomeric determination</b> .....                                | 24 |
| <b>Characterisation for the A<sup>3</sup> Coupling products.</b> ..... | 29 |
| <b>References</b> .....                                                | 39 |
| <b>NMR Data</b> .....                                                  | 40 |
| <b>ESI-MS Data</b> .....                                               | 58 |

## Experimental section

### Materials

All reagents were purchased from Sigma Aldrich, Fluorochem, Tokyo Chemical Industry, Apollo Scientific, Fischer Scientific or Alfa Aesar and used without further purification. Experiments were performed under aerobic conditions or argon.

### Instrumentation

NMR spectra were recorded with a Varian VNMRS 600 at 25 °C, at either 600 MHz or 151 MHz in CDCl<sub>3</sub> or DMSO-d<sub>6</sub>. Chemical shifts are quoted in parts per million (ppm). Coupling constants (J) are recorded in units of Hz. FT-IR spectra were recorded over the range of 4000–650 cm<sup>-1</sup> on a PerkinElmer Spectrum One FT-IR spectrometer fitted with a UATR polarisation accessory. HRMS data were obtained with a Bruker Daltonics Fourier Transform (FTMS) Apex II spectrometer with electrospray ionisation (ESI) and methanol as solvent. HR-MS data were obtained on a VG Autospec Fissions instrument (EI at 70 eV). Molecular ions are reported as mass/charge (m/z) ratios. Thermogravimetric analysis was carried out with a Thermogravimetric analyser Q-50 V20.13 using a platinum pan, in a nitrogen atmosphere from 25 – 800 °C, at a scan rate of 5 °C/min. UV-Vis was recorded over the range of 320-1100 nm at 25 °C using an Avantor v-3000pc spectrophotometer. Purification of compounds with normal-phase silica flash column chromatography was conducted on a Teledyne Isco Combiflash with UV detection at all wavelengths. Elemental analysis was carried out at the London Metropolitan University.

### PXRD and SXRD

Single crystal diffraction data for ligands SS-H<sub>2</sub>L<sub>2</sub>\_BM80min and SS-H<sub>2</sub>L<sub>2</sub>\_BM10min, SS-CuL<sub>2</sub>, RR-CuL<sub>2</sub> and RR-FeCIL<sub>2</sub> were collected at the National Crystallography Service, University of Southampton.<sup>1</sup> Suitable crystals were mounted on a MITIGEN holder in oil on a Rigaku 007HF diffractometer with HF Varimax confocal mirrors, a UG2 goniometer and HyPix 6000HE detector and data were collected at *T* = 100(2)K. The data were processed with CrysAlisPro and solved by intrinsic phasing methods with SHELXT.<sup>2</sup> All crystal structures were then refined on Fo<sup>2</sup> by full-matrix least-squares refinements using SHELXL<sup>2</sup> or olex2.refine 1.5-alpha (SS-CuL<sub>2</sub> and RR-CuL<sub>2</sub>)<sup>3</sup>. Single crystal diffraction data for ligands RR-H<sub>2</sub>L<sub>2</sub>\_solvent\_made, RR-H<sub>2</sub>L<sub>2</sub>\_BM10min and SS-H<sub>2</sub>L<sub>2</sub>\_BM80min\_MeOH and recovered materials SS-CuL<sub>2</sub> and RR-CuL<sub>2</sub> were collected at University of Sussex in a Rigaku rotating anode diffractometer at *T* = 100(2)K. Geometric/crystallographic calculations were performed using PLATON,<sup>3</sup>Olex2,<sup>4</sup> and WINGX<sup>5</sup> packages; graphics were prepared with Crystal Maker.<sup>6</sup> Structures have been given CCDC deposition numbers 2284741–2284750.

PXRD data were collected at the National Crystallography Service, University of Southampton on a Rigaku MiniFlex in theta-2theta geometry using Cu (Ka1/Ka2) radiation and a Ni Kb filter (detector side). Additional beam optics and settings: primary & secondary axial Soller slit (2.5°), fixed 1.25mm divergence & receiving slits, 1mm anti-scatter-screen, Detector: NaI scintillation counter, Generator: 600W (40kV, 15mA). Data collection range 5° <= θ <= 50°, step size 0.01°, collection time 0.2°/min.

## Synthesis

### Ligand synthesis H<sub>2</sub>L<sub>1</sub>

All three N,N'-bis(3,5-di-tert-butylsalicylidene)-1,2-cyclohexanediamine ligands were synthesised using high-vibration ball milling (HVBM). N,N'-1,2-diaminocyclohexane (0.111g, 0.12ml, 1.00 mmol) (racemic or RR or SS) and 3,5-di-tert-butyl-2-hydroxybenzaldehyde (0.468 g, 2.00mmol) were combined in 25 ml ball mill Teflon jar with two Ceramic medium size balls and mixed for 10 minutes at 25 Hz frequency. The yellow solid was collected in excellent yields (>99%, based on N,N'-1,2-diaminocyclohexane). <sup>1</sup>H NMR (600 MHz, CDCl<sub>3</sub>) δ 13.72 (s, 2H), 8.30 (s, 2H), 7.30 (d, *J* = 2.4 Hz, 2H), 6.98 (d, *J* = 2.4 Hz, 2H), 3.34 – 3.29 (m, 2H), 1.94 (d, *J* = 13.4 Hz, 2H), 1.73 (d, *J* = 12.2 Hz, 3H), 1.55 (s, 2H), 1.46 (t, *J* = 10.8 Hz, 2H), 1.41 (s, 19H), 1.23 (s, 18H). <sup>13</sup>C NMR (151 MHz, CDCl<sub>3</sub>) δ 165.78, 157.98, 139.85, 136.30, 126.72, 126.02, 117.82, 72.41, 34.93, 34.01, 33.27, 31.40, 29.40, 24.34.

### Ligand synthesis H<sub>2</sub>L<sub>2</sub>

(S,S) H<sub>2</sub>L<sub>2</sub> and (R,R) H<sub>2</sub>L<sub>2</sub> ligands were synthesised using high-vibration ball milling (HVBM). (S,S) 1,2-diphenylethylenediamine (0.212g, 1.00 mmol) and 3,5-di-tert-butyl-2-hydroxybenzaldehyde (0.468 g, 2.00 mmol) ball mill Teflon jar with two Ceramic medium size balls and mixed for 10 minutes at 25 Hz frequency.

The yellow solid was collected in excellent yields (>99%, based on *S,S*-1,2-diphenylethylenediamine). <sup>1</sup>H NMR (600 MHz, CDCl<sub>3</sub>) δ 8.41 (s, 2H), 7.31 (d, *J* = 2.4 Hz, 2H), 7.23 – 7.18 (m, 4H), 7.18 – 7.13 (m, 6H), 6.98 (d, *J* = 2.4 Hz, 2H), 4.73 (s, 2H), 1.42 (s, 18H), 1.22 (s, 18H). <sup>13</sup>C NMR (151 MHz, CDCl<sub>3</sub>) δ 167.23, 128.25, 128.02, 31.39, 29.41.

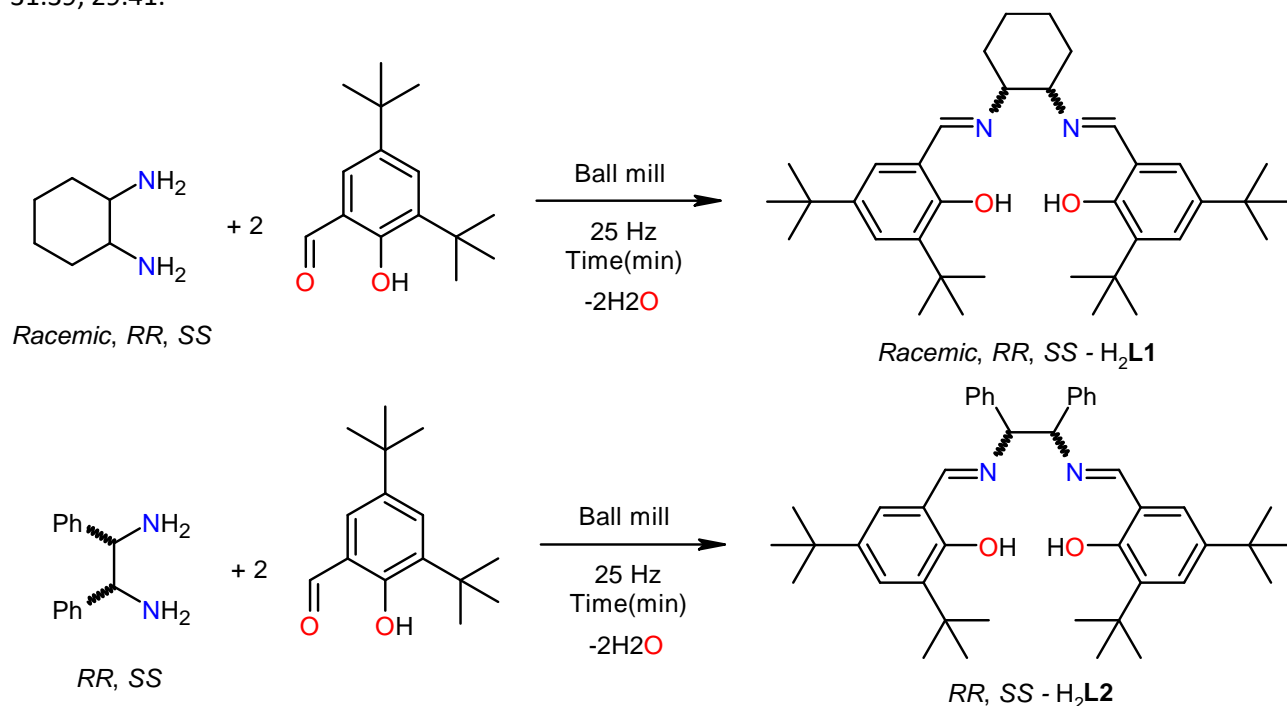

**Table S1.** Optimisation table for the ball mill synthesis of the ligand *racemic*-H<sub>2</sub>L1. Amine-aldehyde ratio 1:2. Optimum conditions have been highlighted in bold.

| Entry | Number of balls<br>(diameter/<br>millimeter) | Ball Material                | Jar Material    | Time<br>(min) | Frequency<br>(Hz) | Yield (%) |
|-------|----------------------------------------------|------------------------------|-----------------|---------------|-------------------|-----------|
| 1     | 2(6mm)                                       | Stainless steel              | Stainless steel | 5             | 3                 | -         |
| 2     | 4(3mm)                                       | Stainless steel              | Stainless steel | 5             | 3                 | -         |
| 3     | 2(8mm)                                       | Ceramic                      | Stainless steel | 5             | 3                 | -         |
| 4     | 2(8mm)                                       | Ceramic                      | Teflon          | 5             | 3                 | -         |
| 5     | 2(6mm)                                       | Stainless steel              | Stainless steel | 5             | 5                 | -         |
| 6     | 4(3mm)                                       | Stainless steel              | Stainless steel | 5             | 5                 | -         |
| 7     | 3(8mm&3mm)                                   | 1 Ceramic, 2 Stainless steel | Stainless steel | 5             | 5                 | -         |
| 8     | 2(8mm)                                       | Ceramic                      | Teflon          | 5             | 5                 | -         |
| 9     | 2(6mm)                                       | Stainless steel              | Stainless steel | 5             | 10                | -         |
| 10    | 4(3mm)                                       | Stainless steel              | Stainless steel | 5             | 10                | -         |
| 11    | 2(8mm)                                       | Ceramic                      | Stainless steel | 5             | 10                | -         |
| 12    | 2(8mm)                                       | Ceramic                      | Teflon          | 5             | 10                | -         |
| 13    | 4(3mm)                                       | Stainless steel              | Stainless steel | 5             | 10                | -         |
| 14    | 3(8mm&3mm)                                   | 1 Ceramic, 2 Stainless steel | Stainless steel | 5             | 10                | -         |
| 15    | 2(6mm)                                       | Stainless steel              | Stainless steel | 5             | 15                | 50        |
| 16    | 4(3mm)                                       | Stainless steel              | Stainless steel | 5             | 15                | 50        |
| 17    | 2(8mm)                                       | Ceramic                      | Stainless steel | 5             | 15                | 50        |
| 18    | 2(8mm)                                       | Ceramic                      | Teflon          | 5             | 15                | 60        |
| 19    | 2(6mm)                                       | Stainless steel              | Stainless steel | 5             | 20                | 70        |
| 20    | 4(3mm)                                       | Stainless steel              | Stainless steel | 5             | 20                | 70        |
| 21    | 2(8mm)                                       | Ceramic                      | Stainless steel | 5             | 20                | 70        |
| 22    | 2(8mm)                                       | Ceramic                      | Teflon          | 5             | 20                | 75        |

|           |               |                 |                 |           |           |               |
|-----------|---------------|-----------------|-----------------|-----------|-----------|---------------|
| 23        | 2(6mm)        | Stainless steel | Stainless steel | 5         | 25        | 80            |
| 24        | 2(6mm)        | Stainless steel | Stainless steel | 10        | 25        | 96            |
| 25        | 4(3mm)        | Stainless steel | Stainless steel | 10        | 25        | 96            |
| 26        | 2(8mm)        | Ceramic         | Stainless stile | 10        | 25        | 97            |
| <b>27</b> | <b>2(8mm)</b> | <b>Ceramic</b>  | <b>Teflon</b>   | <b>10</b> | <b>25</b> | <b>&gt;99</b> |

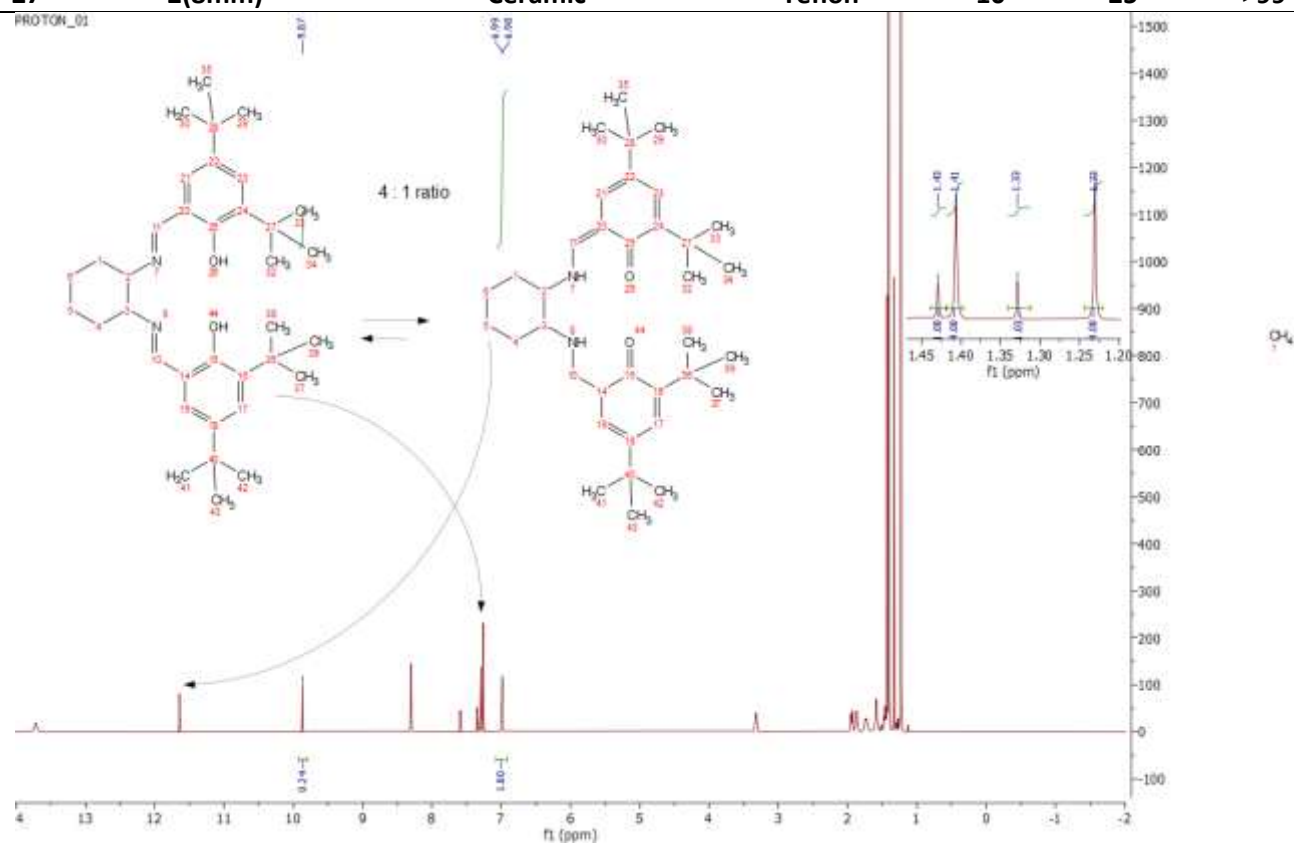

**Figure S1.** <sup>1</sup>H NMR of the ligand racemic-H<sub>2</sub>L1 after 80 minutes

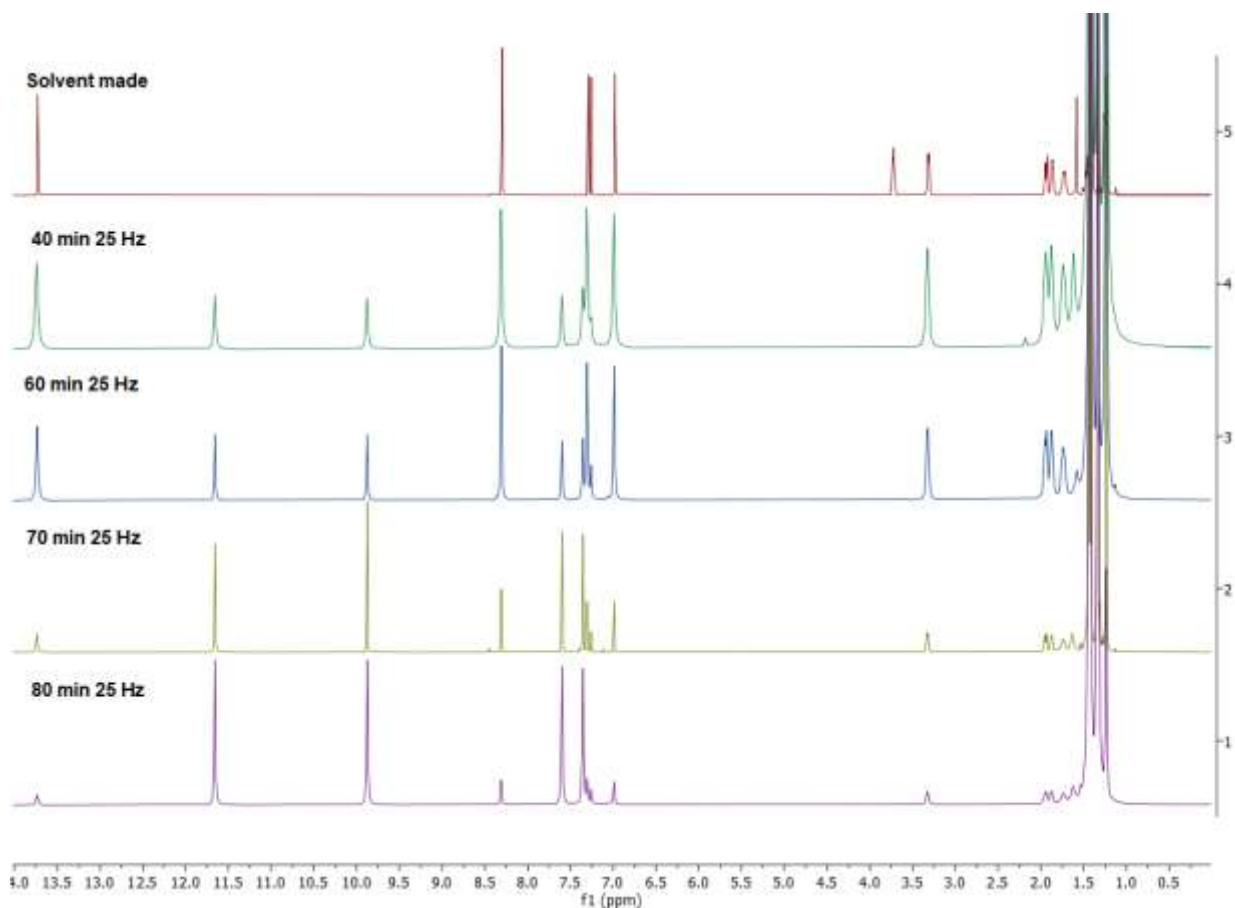

**Figure S2.** <sup>1</sup>H NMR of racemic-H<sub>2</sub>L1 after different milling timings, using steel balls and jars (Entries 1 & 27).

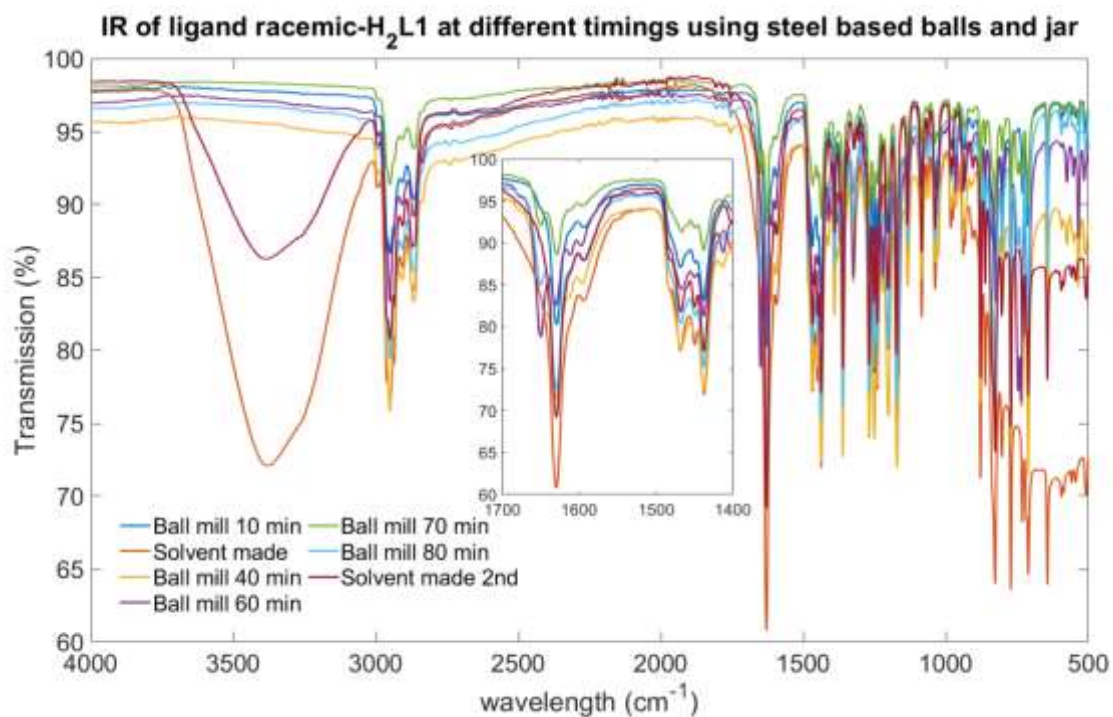

**Figure S3.** IR spectra of racemic-H<sub>2</sub>L1 synthesized at different timings.

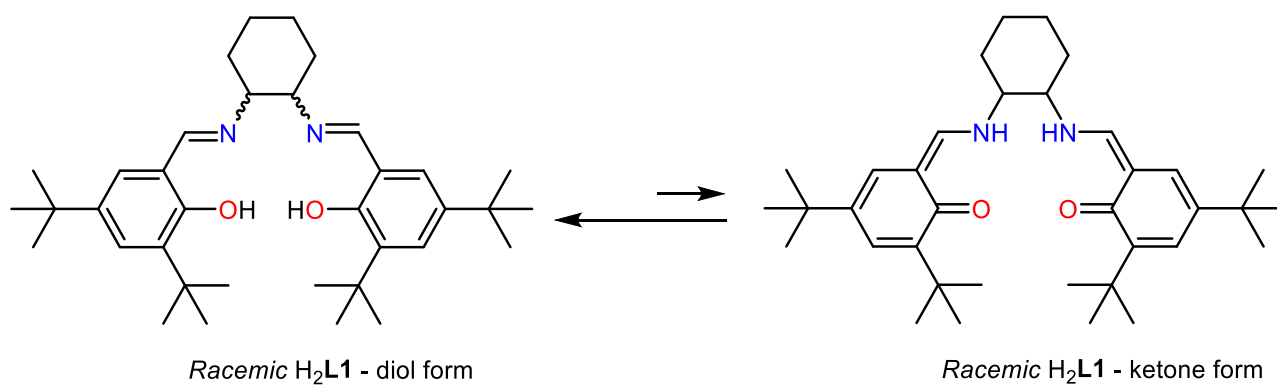

**Scheme S1.** Resonance structures of the diol (desired) and ketone forms (unwanted) of racemic-H<sub>2</sub>L1.

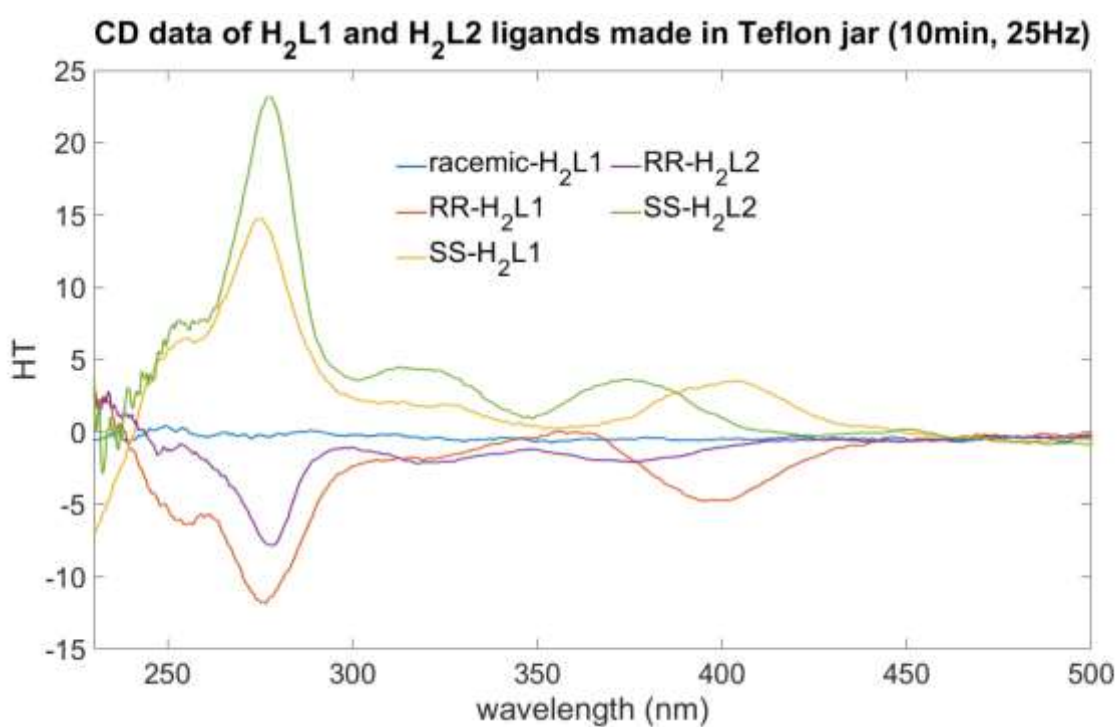

**Figure S4.** Circular Dichroism data for all ligands

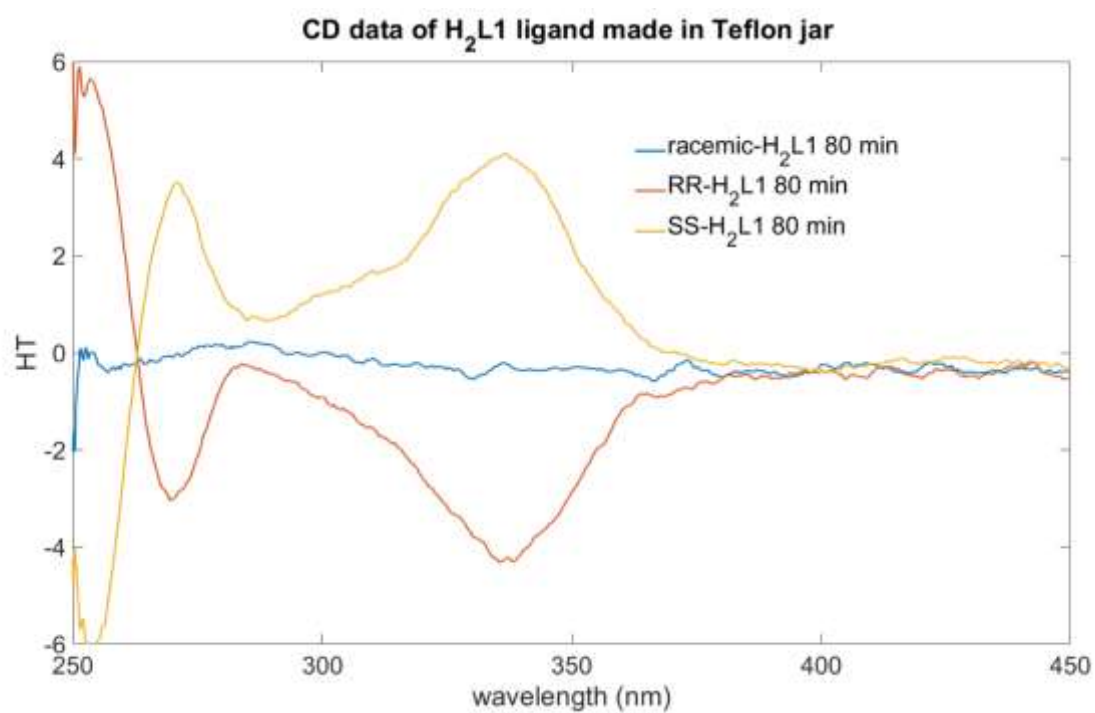

**Figure S5.** Circular Dichroism data for ligands H<sub>2</sub>L1, after 80 minutes with Teflon jar and ceramic balls.

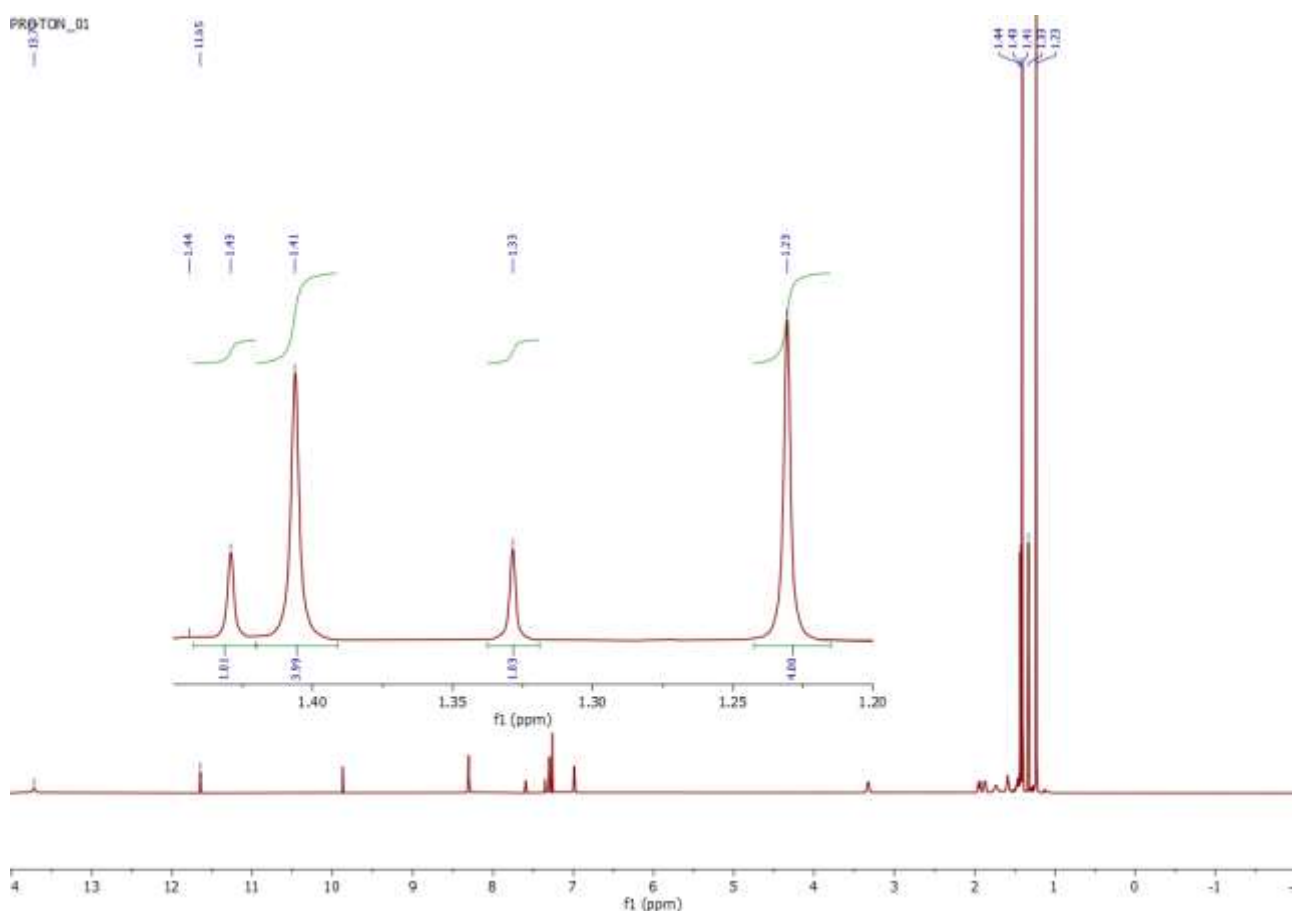

**Figure S6.** <sup>1</sup>H NMR of RR-H<sub>2</sub>L2 after 80 minutes

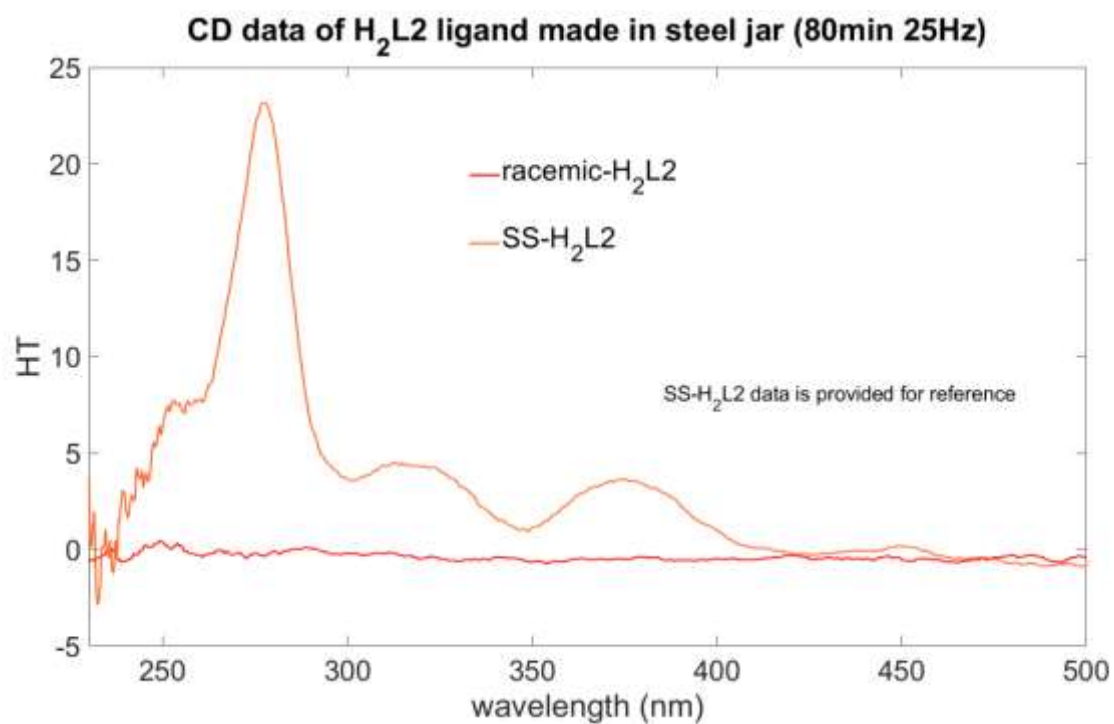

**Figure S7.** Circular Dichroism data for H<sub>2</sub>L<sub>2</sub> that loses chirality (see Table S2 first entry)



**Table S2** Crystal data and structure refinement for ligands

| Identification code                         | SS-H <sub>2</sub> L2-BM80min                                  | SS-H <sub>2</sub> L2-BM10min                                  | SS-H <sub>2</sub> L2-BM80min_MeOH                             | RR-H <sub>2</sub> L2-BM10min                                  | RR-H <sub>2</sub> L2_Solvent_made                             |
|---------------------------------------------|---------------------------------------------------------------|---------------------------------------------------------------|---------------------------------------------------------------|---------------------------------------------------------------|---------------------------------------------------------------|
| Empirical formula                           | C <sub>44</sub> H <sub>56</sub> N <sub>2</sub> O <sub>2</sub> | C <sub>44</sub> H <sub>56</sub> N <sub>2</sub> O <sub>2</sub> | C <sub>44</sub> H <sub>56</sub> N <sub>2</sub> O <sub>2</sub> | C <sub>44</sub> H <sub>56</sub> N <sub>2</sub> O <sub>2</sub> | C <sub>44</sub> H <sub>56</sub> N <sub>2</sub> O <sub>2</sub> |
| Formula weight                              | 644.90                                                        | 644.90                                                        | 644.90                                                        | 644.90                                                        | 644.90                                                        |
| Temperature/K                               | 100(2)                                                        | 100.00(10)                                                    | 100.01(10)                                                    | 100.00(10)                                                    | 100.00(11)                                                    |
| Crystal system                              | triclinic                                                     | monoclinic                                                    | orthorhombic                                                  | orthorhombic                                                  | orthorhombic                                                  |
| Space group                                 | P-1                                                           | I2                                                            | P2 <sub>1</sub> 2 <sub>1</sub> 2 <sub>1</sub>                 | P2 <sub>1</sub> 2 <sub>1</sub> 2 <sub>1</sub>                 | P2 <sub>1</sub> 2 <sub>1</sub> 2 <sub>1</sub>                 |
| a/Å                                         | 9.4526(2)                                                     | 10.8545(2)                                                    | 10.04086(13)                                                  | 10.03506(7)                                                   | 10.03785(4)                                                   |
| b/Å                                         | 13.5974(4)                                                    | 10.17090(10)                                                  | 19.8914(2)                                                    | 19.89824(17)                                                  | 19.90232(11)                                                  |
| c/Å                                         | 16.3518(7)                                                    | 35.9232(5)                                                    | 20.0896(3)                                                    | 20.08814(14)                                                  | 20.09076(10)                                                  |
| α/°                                         | 66.069(3)                                                     | 90                                                            | 90                                                            | 90                                                            | 90                                                            |
| β/°                                         | 75.352(3)                                                     | 95.1270(10)                                                   | 90                                                            | 90                                                            | 90                                                            |
| γ/°                                         | 81.926(2)                                                     | 90                                                            | 90                                                            | 90                                                            | 90                                                            |
| Volume/Å <sup>3</sup>                       | 1856.89(11)                                                   | 3950.05(10)                                                   | 4012.41(8)                                                    | 4011.20(5)                                                    | 4013.66(3)                                                    |
| Z                                           | 2                                                             | 4                                                             | 4                                                             | 4                                                             | 4                                                             |
| ρ <sub>calc</sub> /cm <sup>3</sup>          | 1.153                                                         | 1.084                                                         | 1.068                                                         | 1.068                                                         | 1.067                                                         |
| μ/mm <sup>-1</sup>                          | 0.533                                                         | 0.501                                                         | 0.493                                                         | 0.493                                                         | 0.493                                                         |
| F(000)                                      | 700.0                                                         | 1400.0                                                        | 1400.0                                                        | 1400.0                                                        | 1400.0                                                        |
| Crystal size/mm <sup>3</sup>                | 0.04 × 0.02 × 0.01                                            | 0.209 × 0.125 × 0.09                                          | 0.1 × 0.08 × 0.05                                             | 0.08 × 0.04 × 0.02                                            | 0.1 × 0.05 × 0.03                                             |
| Radiation                                   | Cu Kα (λ = 1.54178)                                           | Cu Kα (λ = 1.54178)                                           | Cu Kα (λ = 1.54184)                                           | Cu Kα (λ = 1.54184)                                           | Cu Kα (λ = 1.54184)                                           |
| 2θ range for data collection/°              | 7.118 to 154.054                                              | 4.94 to 136.432                                               | 9.868 to 132.658                                              | 8.888 to 134.19                                               | 8.802 to 132.676                                              |
| Index ranges                                | -10 ≤ h ≤ 11, -17 ≤ k ≤ 16, -20 ≤ l ≤ 20                      | -12 ≤ h ≤ 13, -12 ≤ k ≤ 12, -43 ≤ l ≤ 43                      | -11 ≤ h ≤ 11, -23 ≤ k ≤ 23, -18 ≤ l ≤ 23                      | -11 ≤ h ≤ 10, -23 ≤ k ≤ 23, -21 ≤ l ≤ 23                      | -11 ≤ h ≤ 11, -23 ≤ k ≤ 23, -23 ≤ l ≤ 23                      |
| Reflections collected                       | 35872                                                         | 66029                                                         | 23123                                                         | 39138                                                         | 28720                                                         |
| Independent reflections                     | 7452 [R <sub>int</sub> = 0.0500, R <sub>sigma</sub> = 0.0350] | 7205 [R <sub>int</sub> = 0.0416, R <sub>sigma</sub> = 0.0166] | 6686 [R <sub>int</sub> = 0.0323, R <sub>sigma</sub> = 0.0239] | 7102 [R <sub>int</sub> = 0.0385, R <sub>sigma</sub> = 0.0231] | 6928 [R <sub>int</sub> = 0.0358, R <sub>sigma</sub> = 0.0258] |
| Data/restraints/parameters                  | 7452/0/447                                                    | 7205/1/447                                                    | 6686/0/477                                                    | 7102/30/459                                                   | 6928/0/477                                                    |
| Goodness-of-fit on F <sup>2</sup>           | 1.033                                                         | 1.040                                                         | 1.039                                                         | 1.051                                                         | 1.037                                                         |
| Final R indexes [I >= 2σ (I)]               | R <sub>1</sub> = 0.0459, wR <sub>2</sub> = 0.1137             | R <sub>1</sub> = 0.0347, wR <sub>2</sub> = 0.0930             | R <sub>1</sub> = 0.0293, wR <sub>2</sub> = 0.0767             | R <sub>1</sub> = 0.0316, wR <sub>2</sub> = 0.0816             | R <sub>1</sub> = 0.0291, wR <sub>2</sub> = 0.0754             |
| Final R indexes [all data]                  | R <sub>1</sub> = 0.0565, wR <sub>2</sub> = 0.1209             | R <sub>1</sub> = 0.0351, wR <sub>2</sub> = 0.0933             | R <sub>1</sub> = 0.0297, wR <sub>2</sub> = 0.0775             | R <sub>1</sub> = 0.0326, wR <sub>2</sub> = 0.0826             | R <sub>1</sub> = 0.0303, wR <sub>2</sub> = 0.0759             |
| Largest diff. peak/hole / e Å <sup>-3</sup> | 0.23/-0.26                                                    | 0.16/-0.20                                                    | 0.16/-0.12                                                    | 0.25/-0.25                                                    | 0.13/-0.13                                                    |
| Flack parameter                             |                                                               | 0.04(8)                                                       | 0.03(7)                                                       | 0.04(7)                                                       | 0.01(7)                                                       |

## Complex synthesis

The complexation reaction of *racemic*-H<sub>2</sub>L1 and CuCl<sub>2</sub>, in a molar ratio (1:1) was performed using high-vibration ball milling (HVBM). The *racemic*-H<sub>2</sub>L1 (0.544 g, 1.00 mmol) and CuCl<sub>2</sub> (0.134 g, 1.00 mmol) were combined in 25 ml ball mill Teflon jar with two Ceramic medium size balls and mixed for 3 hr at 25 Hz frequency. The resulting compound was washed with five drops (~0.25 ml) of H<sub>2</sub>O and recrystallised from Acetone (5 ml) and obtained as brown crystals (599 mg, 98% yield)

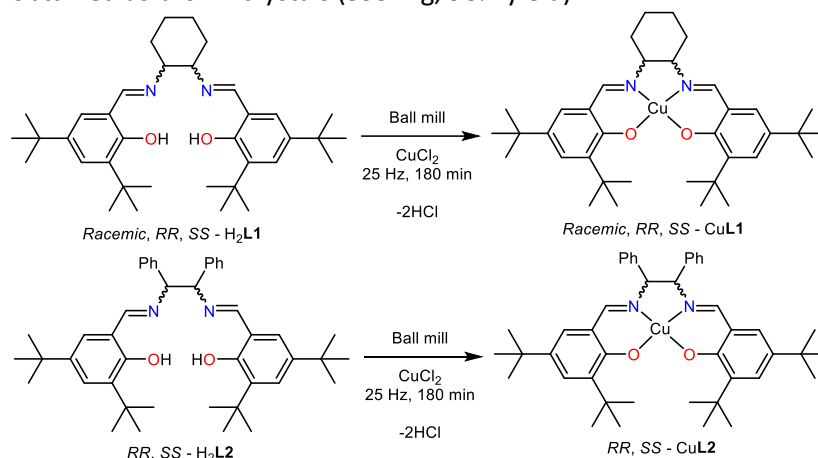

**Table S3.** Optimisation table for the ball mill synthesis of *racemic*-CuL1. Optimum conditions have been highlighted in bold.

| Entry     | Method                 | Metal salt                        | Metal salt: Ligand ratio | Time (min) | Frequency (Hz) | Jar - balls            | Yield (%)     |
|-----------|------------------------|-----------------------------------|--------------------------|------------|----------------|------------------------|---------------|
| 1         | BMML+Metal salt        | Cu(OTf) <sub>2</sub>              | 1:1                      | 10         | 25             | Stainless steel        | -             |
| 2         | BMML+Metal salt        | Cu(OTf) <sub>2</sub>              | 1:1                      | 20         | 25             | Stainless steel        | -             |
| 3         | BMML+Metal salt        | Cu(OTf) <sub>2</sub>              | 1:1                      | 30         | 25             | Stainless steel        | -             |
| 4         | BMML+Metal salt        | Cu(OTf) <sub>2</sub>              | 1:1                      | 40         | 25             | Stainless steel        | 20            |
| 5         | BMML+Metal salt        | Cu(OTf) <sub>2</sub>              | 1:1                      | 50         | 25             | Stainless steel        | 38            |
| 6         | BMML+Metal salt        | Cu(OTf) <sub>2</sub>              | 1:1                      | 60         | 25             | Stainless steel        | 50            |
| 7         | BMML+Metal salt        | Cu(OTf) <sub>2</sub>              | 1:1                      | 70         | 25             | Stainless steel        | 55            |
| 8         | BMML+Metal salt        | Cu(OTf) <sub>2</sub>              | 1:1                      | 80         | 25             | Stainless steel        | 64            |
| 9         | BMML+Metal salt        | Cu(OTf) <sub>2</sub>              | 1:1                      | 90         | 25             | Stainless steel        | 70            |
| 10        | BMML+Metal salt        | Cu(OTf) <sub>2</sub>              | 1:1                      | 120        | 25             | Stainless steel        | 85            |
| 11        | BMML+Metal salt        | Cu(NO <sub>3</sub> ) <sub>2</sub> | 1:1                      | 120        | 25             | Stainless steel        | 75            |
| 12        | BMML+Metal salt        | CuBr <sub>2</sub>                 | 1:1                      | 120        | 25             | Stainless steel        | 88            |
| 13        | BMML+Metal salt        | Cu(BF <sub>4</sub> ) <sub>2</sub> | 1:1                      | 120        | 25             | Stainless steel        | 90            |
| 14        | BMML+Metal salt        | CuCl <sub>2</sub>                 | 1:1                      | 120        | 25             | Stainless steel        | 97            |
| <b>15</b> | <b>BMML+Metal salt</b> | <b>CuCl<sub>2</sub></b>           | <b>1:1</b>               | <b>120</b> | <b>25</b>      | <b>Teflon, ceramic</b> | <b>&gt;99</b> |
| 16        | SML+Metal salt         | Cu(OTf) <sub>2</sub>              | 1:1                      | 10         | 25             | Stainless steel        | -             |
| 17        | SML+Metal salt         | Cu(OTf) <sub>2</sub>              | 1:1                      | 20         | 25             | Stainless steel        | -             |
| 18        | SML+Metal salt         | Cu(OTf) <sub>2</sub>              | 1:1                      | 30         | 25             | Stainless steel        | -             |
| 19        | SML+Metal salt         | Cu(OTf) <sub>2</sub>              | 1:1                      | 40         | 25             | Stainless steel        | -             |
| 20        | SML+Metal salt         | Cu(OTf) <sub>2</sub>              | 1:1                      | 50         | 25             | Stainless steel        | -             |
| 21        | SML+Metal salt         | Cu(OTf) <sub>2</sub>              | 1:1                      | 60         | 25             | Stainless steel        | 30            |
| 22        | SML+Metal salt         | Cu(OTf) <sub>2</sub>              | 1:1                      | 70         | 25             | Stainless steel        | 48            |
| 23        | SML+Metal salt         | Cu(OTf) <sub>2</sub>              | 1:1                      | 80         | 25             | Stainless steel        | 55            |
| 24        | SML+Metal salt         | Cu(OTf) <sub>2</sub>              | 1:1                      | 90         | 25             | Stainless steel        | 58            |
| 25        | SML+Metal salt         | Cu(OTf) <sub>2</sub>              | 1:1                      | 120        | 25             | Stainless steel        | 62            |
| 26        | SML+Metal salt         | Cu(OTf) <sub>2</sub>              | 1:1                      | 120        | 25             | Teflon, ceramic        | 72            |
| 27        | SML+Metal salt         | CuCl <sub>2</sub>                 | 1:1                      | 120        | 25             | Teflon, ceramic        | 75            |
| 28        | All in one step        | CuCl <sub>2</sub>                 | 1:2:1                    | 120        | 25             | Teflon, ceramic        | 30            |

PXRD

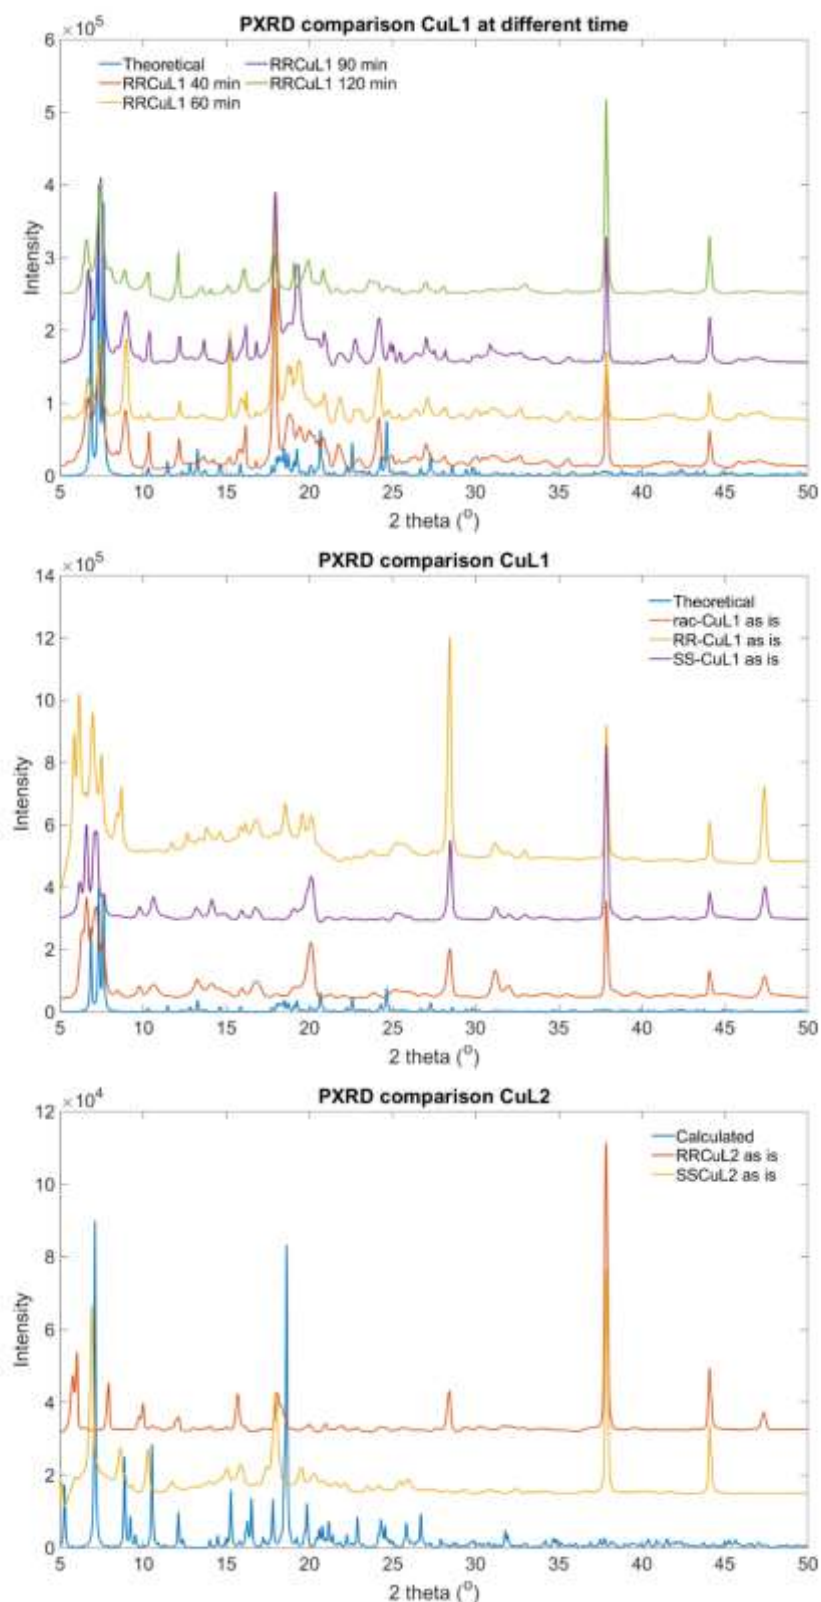

**Figure S8.** The Powder XRD data for CuL1/ CuL2 at different timings (upper) and after 3 hours (middle, lower). These data suggest either the presence of impurities (these are complexes with coordinated water molecules) or crystallisation of the expected compound in a different space group.

## Elemental analyses

Elemental analysis results for all complexes were recorded at London Metropolitan University. The samples, upon synthesis, were stored in Eppendorf vials. There is a deviation in the data; we assume this deviation is caused by losing their crystallinity and absorbing moisture from the atmosphere; therefore, we provide estimated formulae that match the experimental values. The TG, PXRD and EPR studies further validate our estimation, confirming all complexes' phase purity.

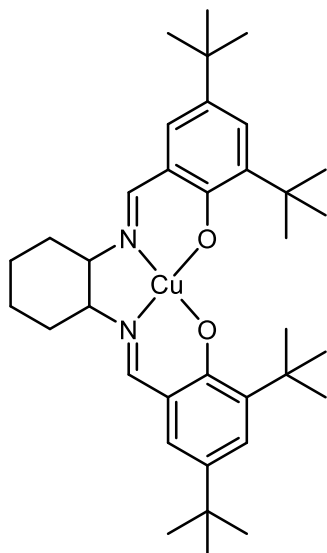

Chemical Formula:  $C_{36}H_{52}CuN_2O_2$

Exact Mass: 607.33

Molecular Weight: 608.37

Elemental Analysis:

C, 71.07; H, 8.62; Cu, 10.45; N, 4.60; O, 5.26

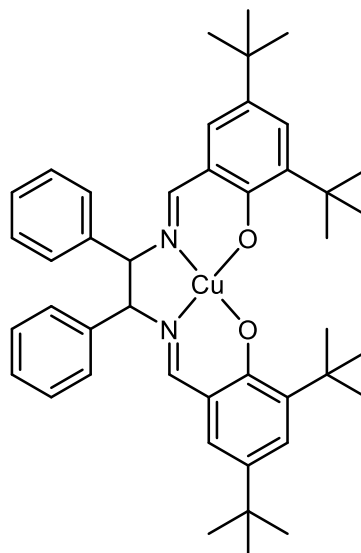

Chemical Formula:  $C_{44}H_{54}CuN_2O_2$

Exact Mass: 705.35

Molecular Weight: 706.47

Elemental Analysis:

C, 74.81; H, 7.70; Cu, 8.99; N, 3.97; O, 4.53

**Rac-CuL1**, Calculated for [**CuL**] C: 71.07; H: 8.62 ; N: 4.60; Found C: 67.09; H: 7.79 ; N:4.36; corresponding to [**CuL1**] 2(**H<sub>2</sub>O**) C: 67.15; H: 8.01; N:4.35

**RR-CuL1** Calculated for [**CuL**] C: 71.07; H: 8.62 ; N: 4.60; Found C: 68.99; H: 7.82 ; N:4.23, corresponding to [**RR-CuL1**] (**H<sub>2</sub>O**) C: 68.73; H: 7.83; N:4.31.

**SS-CuL1**, Calculated for [**CuL**] C: 71.07; H: 8.62 ; N: 4.60; Found C: 65.81; H: 7.70 ; N:4.62, corresponding to [**SS-CuL1**] 3(**H<sub>2</sub>O**) C: 65.91; H: 7.85; N:4.76.

**RR-CuL2**, Calculated for [**CuL**] C: 74.81; H: 7.70; N: 3.97; Found C: 63.39; H: 8.58; N: 3.51; corresponding to [**RR-CuL2**] 7(**H<sub>2</sub>O**) C: 63.48; H: 8.23; N: 3.36;

**SS-CuL2**, Calculated for [**CuL**] C: 74.81; H: 7.70; N: 3.97; Found C: 62.86; H: 8.26; N: 3.30; corresponding to [**SS-CuL2**] 7.5(**H<sub>2</sub>O**) C: 62.80; H: 8.26; N: 3.33;

### Circular Dichroism

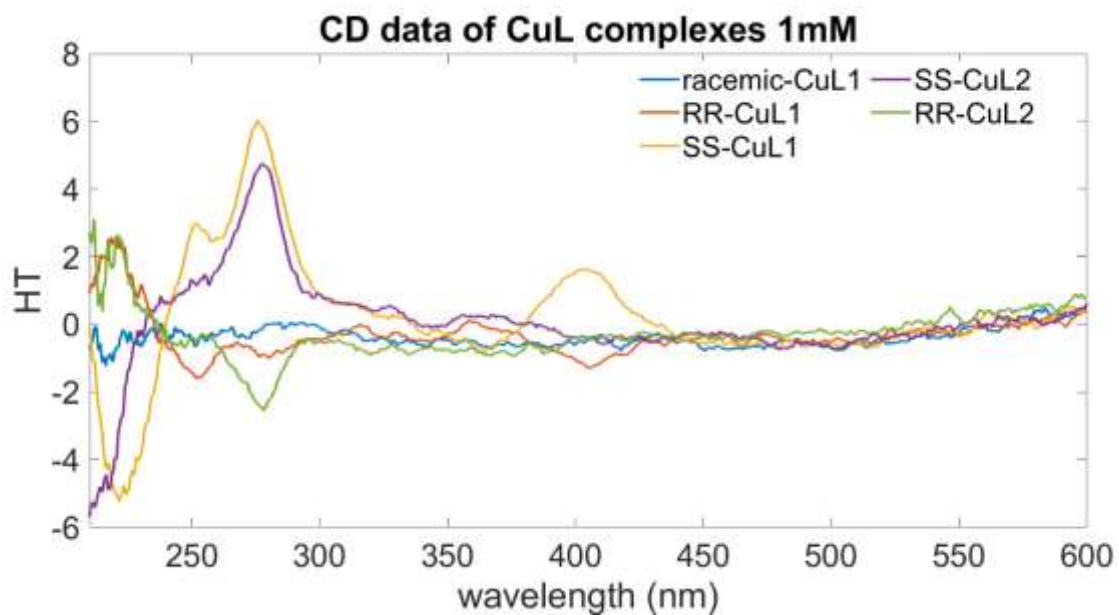

Figure S9. CD data for all complexes at 1 mM in MeOH

### UV-Vis

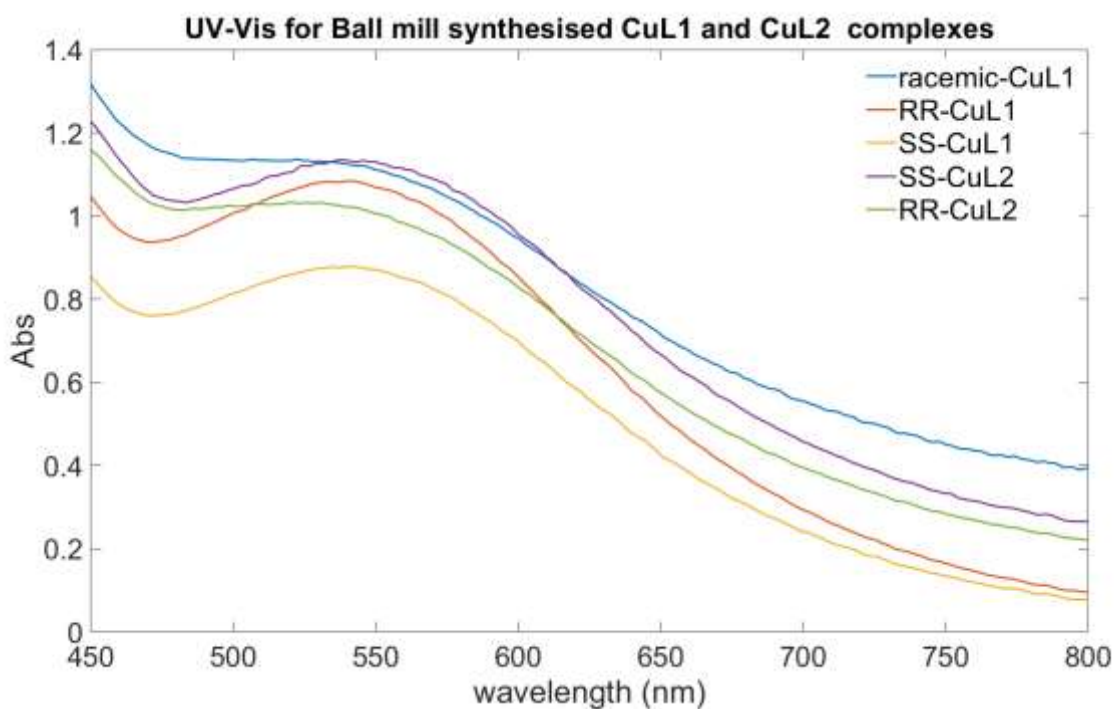

Figure S10. UV-Vis of all complexes at 1 mM in DCM

# ESI-MS H<sub>2</sub>L1

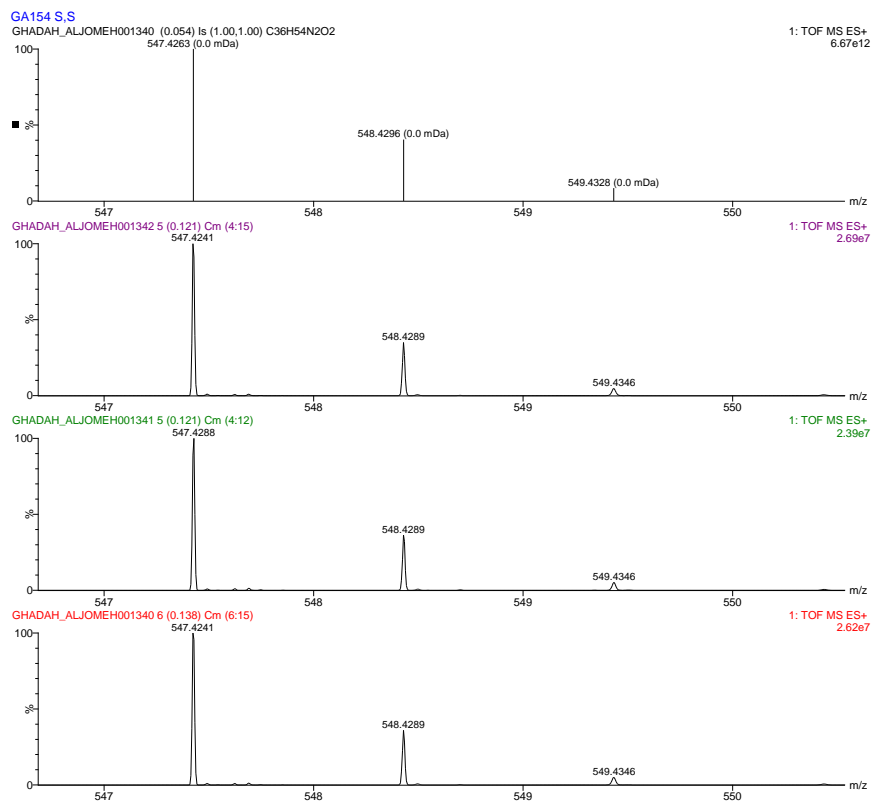

# H<sub>2</sub>L2

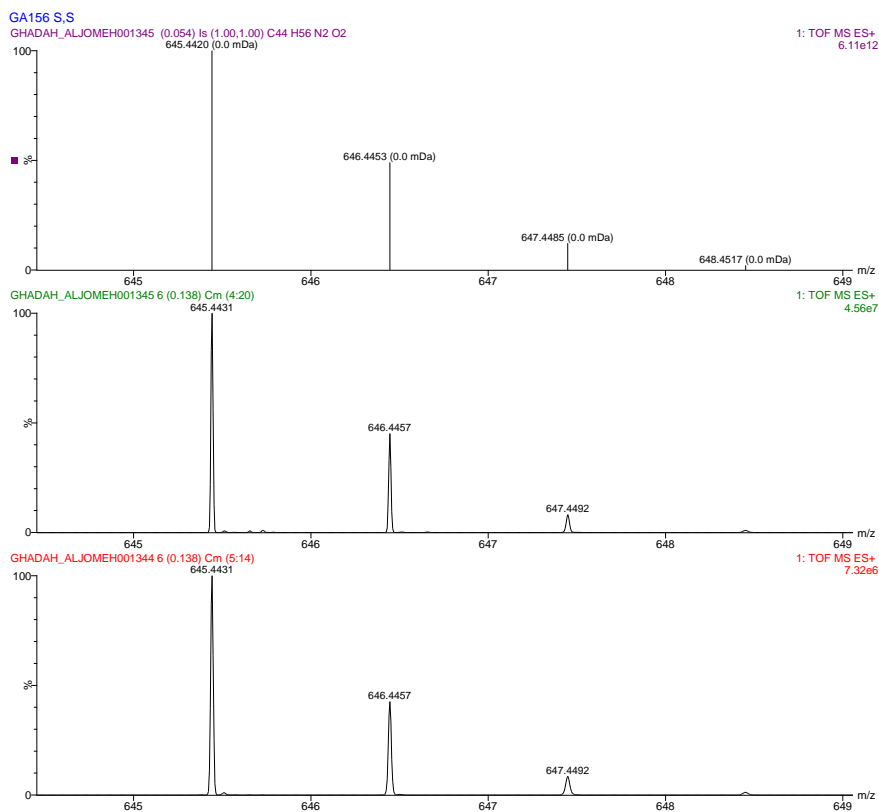

Figure S11. ESI – MS of ligands.

# Cu1

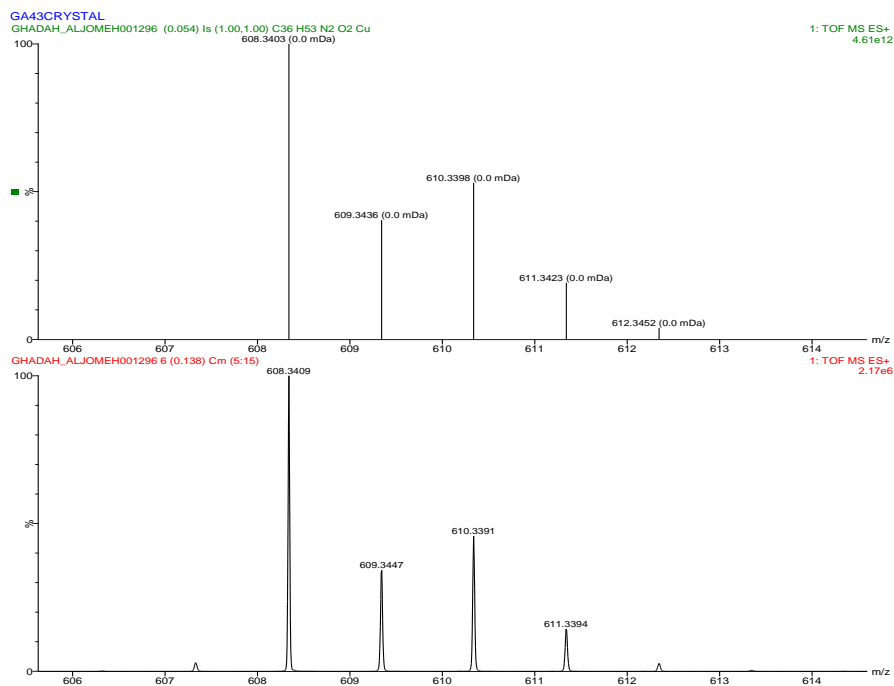

# Cu2

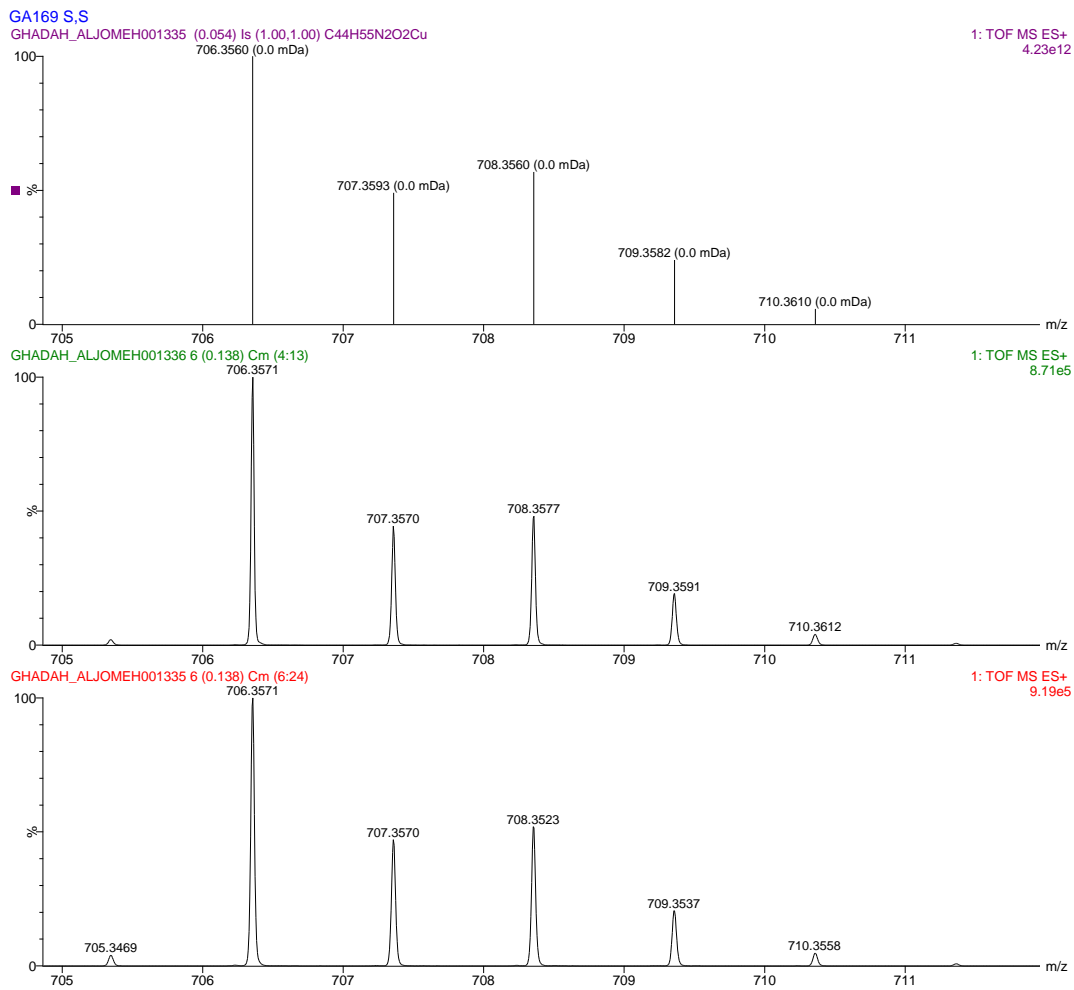

Figure S12. ESI – MS of complexes

**Table S4** Crystal data and structure refinement for complexes

| Identification code                         | <b>SS-CuL2</b>                                                  | <b>RR-CuL2</b>                                                  | <b>SS-CuL2_recovered</b>                                                        | <b>RR-CuL2_recovered</b>                                        |
|---------------------------------------------|-----------------------------------------------------------------|-----------------------------------------------------------------|---------------------------------------------------------------------------------|-----------------------------------------------------------------|
| Empirical formula                           | C <sub>44</sub> H <sub>54</sub> CuN <sub>2</sub> O <sub>2</sub> | C <sub>44</sub> H <sub>54</sub> CuN <sub>2</sub> O <sub>2</sub> | C <sub>176</sub> H <sub>216</sub> Cu <sub>4</sub> N <sub>8</sub> O <sub>8</sub> | C <sub>44</sub> H <sub>54</sub> CuN <sub>2</sub> O <sub>2</sub> |
| Formula weight                              | 706.477                                                         | 706.477                                                         | 2825.72                                                                         | 706.43                                                          |
| Temperature/K                               | 100(2)                                                          | 100(2)                                                          | 100.00(10)                                                                      | 100.02(11)                                                      |
| Crystal system                              | monoclinic                                                      | monoclinic                                                      | monoclinic                                                                      | monoclinic                                                      |
| Space group                                 | P2 <sub>1</sub>                                                 | P2 <sub>1</sub>                                                 | P2 <sub>1</sub>                                                                 | P2 <sub>1</sub>                                                 |
| a/Å                                         | 12.2627(2)                                                      | 12.2761(2)                                                      | 12.2563(2)                                                                      | 12.2439(2)                                                      |
| b/Å                                         | 18.5521(2)                                                      | 18.5554(2)                                                      | 18.5591(2)                                                                      | 18.5343(2)                                                      |
| c/Å                                         | 17.4656(2)                                                      | 17.4532(2)                                                      | 17.4919(3)                                                                      | 17.4600(2)                                                      |
| α/°                                         | 90                                                              | 90                                                              | 90                                                                              | 90                                                              |
| β/°                                         | 105.761(1)                                                      | 105.807(2)                                                      | 105.757(2)                                                                      | 105.7640(10)                                                    |
| γ/°                                         | 90                                                              | 90                                                              | 90                                                                              | 90                                                              |
| Volume/Å <sup>3</sup>                       | 3824.02(9)                                                      | 3825.29(10)                                                     | 3829.29(11)                                                                     | 3813.21(9)                                                      |
| Z                                           | 4                                                               | 4                                                               | 1                                                                               | 4                                                               |
| ρ <sub>calc</sub> /cm <sup>3</sup>          | 1.227                                                           | 1.227                                                           | 1.225                                                                           | 1.231                                                           |
| μ/mm <sup>-1</sup>                          | 1.089                                                           | 1.089                                                           | 1.088                                                                           | 1.093                                                           |
| F(000)                                      | 1504.2                                                          | 1504.2                                                          | 1508.0                                                                          | 1508.0                                                          |
| Crystal size/mm <sup>3</sup>                | 0.23 × 0.2 × 0.04                                               | 0.2 × 0.1 × 0.04                                                | 0.1 × 0.02 × 0.01                                                               | 0.05 × 0.04 × 0.03                                              |
| Radiation                                   | Cu Kα (λ = 1.54178)                                             | Cu Kα (λ = 1.54178)                                             | Cu Kα (λ = 1.54184)                                                             | Cu Kα (λ = 1.54184)                                             |
| 2θ range for data collection/°              | 5.26 to 153.7                                                   | 5.26 to 153.34                                                  | 5.25 to 134.294                                                                 | 5.26 to 134.37                                                  |
| Index ranges                                | -14 ≤ h ≤ 15, -19 ≤ k ≤ 23, -21 ≤ l ≤ 22                        | -14 ≤ h ≤ 14, -23 ≤ k ≤ 18, -21 ≤ l ≤ 22                        | -14 ≤ h ≤ 14, -22 ≤ k ≤ 22, -20 ≤ l ≤ 20                                        | -14 ≤ h ≤ 14, -20 ≤ k ≤ 21, -20 ≤ l ≤ 20                        |
| Reflections collected                       | 35313                                                           | 36390                                                           | 68220                                                                           | 143353                                                          |
| Independent reflections                     | 12825 [R <sub>int</sub> = 0.0512, R <sub>sigma</sub> = 0.0513]  | 12418 [R <sub>int</sub> = 0.0449, R <sub>sigma</sub> = 0.0417]  | 13484 [R <sub>int</sub> = 0.0835, R <sub>sigma</sub> = 0.0508]                  | 13388 [R <sub>int</sub> = 0.0795, R <sub>sigma</sub> = 0.0332]  |
| Data/restraints/parameters                  | 12825/1/907                                                     | 12418/1/907                                                     | 13484/1/907                                                                     | 13388/1/907                                                     |
| Goodness-of-fit on F <sup>2</sup>           | 1.039                                                           | 1.041                                                           | 1.036                                                                           | 1.054                                                           |
| Final R indexes [I>=2σ (I)]                 | R <sub>1</sub> = 0.0658, wR <sub>2</sub> = 0.1733               | R <sub>1</sub> = 0.0400, wR <sub>2</sub> = 0.1005               | R <sub>1</sub> = 0.0662, wR <sub>2</sub> = 0.1788                               | R <sub>1</sub> = 0.0419, wR <sub>2</sub> = 0.0985               |
| Final R indexes [all data]                  | R <sub>1</sub> = 0.0698, wR <sub>2</sub> = 0.1794               | R <sub>1</sub> = 0.0461, wR <sub>2</sub> = 0.1050               | R <sub>1</sub> = 0.0703, wR <sub>2</sub> = 0.1833                               | R <sub>1</sub> = 0.0453, wR <sub>2</sub> = 0.0999               |
| Largest diff. peak/hole / e Å <sup>-3</sup> | 0.74/-1.07                                                      | 0.34/-0.40                                                      | 1.44/-0.64                                                                      | 0.35/-0.43                                                      |
| Flack parameter                             | -0.016(16)                                                      | -0.003(16)                                                      | 0.03(3)                                                                         | 0.008(15)                                                       |



## EPR

CW X-band EPR spectra (T = 120 and 290 K) were recorded on a Bruker EMX spectrometer equipped with an ER4119HS resonator, employing 100 kHz field modulation, 0.3 mT modulation depth and 10.0 mw microwave power. Computer simulations were performed using the Matlab toolbox in Easyspin,<sup>4</sup> implementing the chili function for slow motion and pepper function for solid state spectra.

The room temperature spectra of all samples indicate anisotropic rotation in the solution phase, and are characterized by an axial diffusion tensor, described using a rotational correlation time (in seconds),  $t_{\text{corr}}$ . Notably, no evidence of organic radicals were detected in the room temperature measurements.

**Table S5** Spin Hamiltonian parameters for SS-CuL2 in the presence of A<sup>3</sup> substrates

| Complex                          | $g^{a,b}$                                                 |       |       |                     | A/ MHz    |           |           |
|----------------------------------|-----------------------------------------------------------|-------|-------|---------------------|-----------|-----------|-----------|
|                                  | $g_1$                                                     | $g_2$ | $g_3$ |                     | ${}^cA_1$ | ${}^dA_2$ | ${}^eA_3$ |
| SS-CuL2                          | 2.15                                                      | 2.01  | 2.01  | <sup>63,65</sup> Cu | 590       | 90        | 90        |
|                                  |                                                           |       |       | <sup>14</sup> N     | 50        | 37        | 38        |
|                                  |                                                           |       |       | <sup>1</sup> H      | 20        | 16        | 24        |
|                                  | $t_{\text{corr}} = [0.15, 0.02] \times 10^{-9} \text{ s}$ |       |       |                     |           |           |           |
| SS-CuL2:<br>phenylacetylene      | 2.27                                                      | 2.09  | 2.09  | <sup>63,65</sup> Cu | 500       | 100       | 100       |
|                                  |                                                           |       |       | <sup>14</sup> N     | 50        | 37        | 38        |
|                                  |                                                           |       |       | <sup>1</sup> H      | 20        | 16        | 24        |
|                                  | $t_{\text{corr}} = [0.2, 0.1] \times 10^{-9} \text{ s}$   |       |       |                     |           |           |           |
| SS-CuL2:<br>Pyrrolidine:aldehyde | 2.27                                                      | 2.078 | 2.078 | <sup>63,65</sup> Cu | 500       | 90        | 90        |
|                                  |                                                           |       |       | <sup>14</sup> N     | 40        | 37        | 38        |
|                                  |                                                           |       |       | <sup>1</sup> H      | 20        | 16        | 24        |
|                                  |                                                           |       |       |                     |           |           |           |
| SS-CuL2:<br>A <sup>3</sup>       | 2.27                                                      | 2.06  | 2.06  | <sup>63,65</sup> Cu | 500       | 60        | 60        |
|                                  |                                                           |       |       | <sup>14</sup> N     | 40        | 38        | 50        |
|                                  |                                                           |       |       | <sup>1</sup> H      | 20        | 24        | 20        |
|                                  |                                                           |       |       |                     |           |           |           |

<sup>a</sup>  $g$ - and A-frames are all taken as coincident with the molecular frame; <sup>b</sup>  $\pm 0.005$ ; <sup>c</sup>  $\pm 20$ ; <sup>d</sup>  $\pm 10$

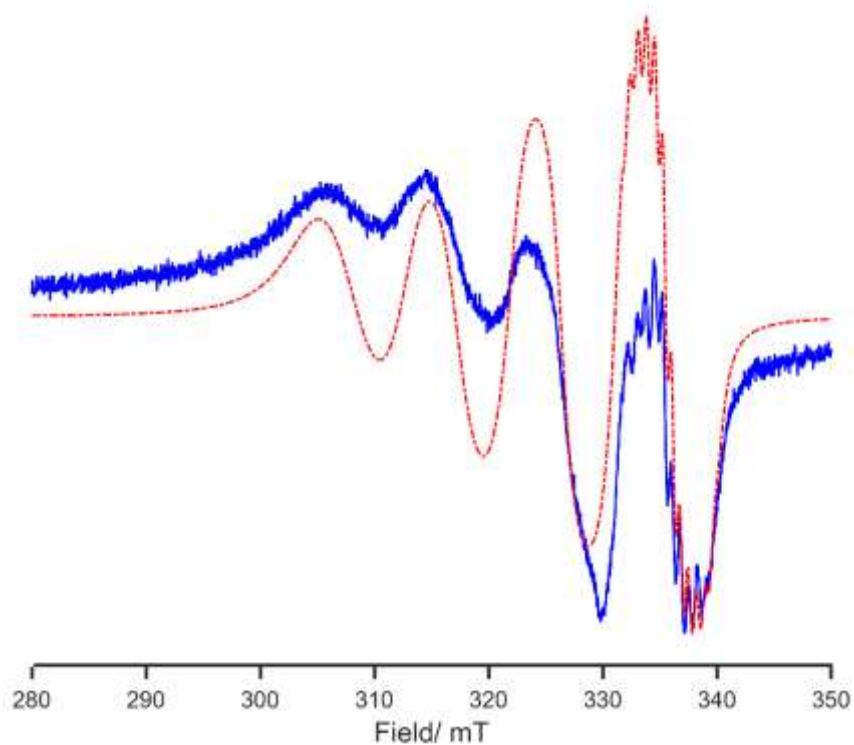

**Figure S13** CW X-band EPR spectrum ( $T = 290$  K) of SS-CuL2 in toluene:DCM solvent; (blue, solid) experimental, (red, dotted) simulation

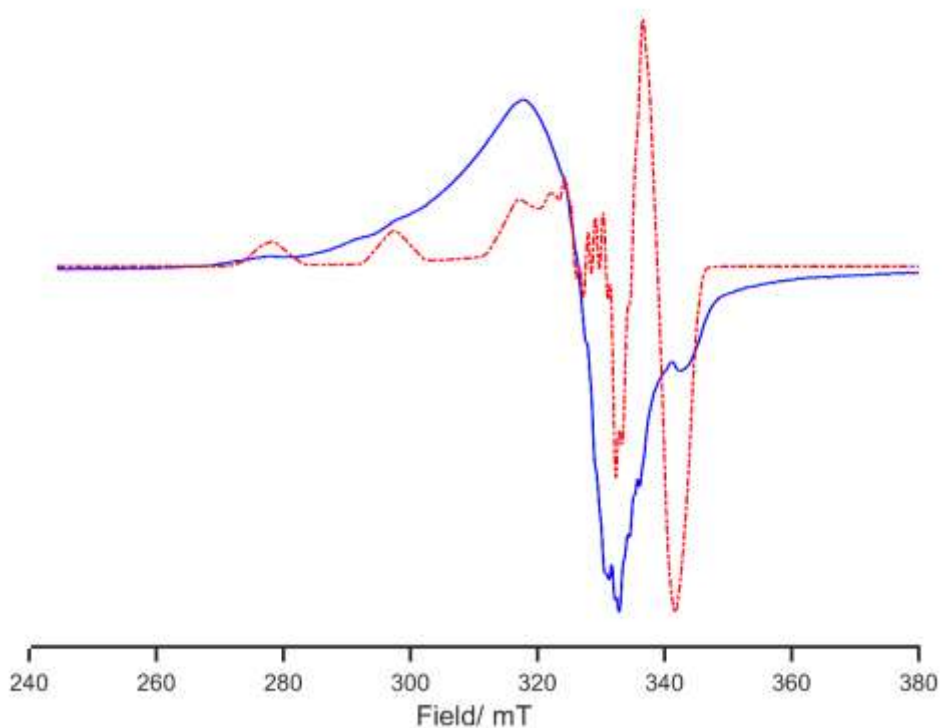

**Figure S14** CW X-band EPR spectrum ( $T = 120$  K) of SS-CuL2 in toluene:DCM solvent; (blue, solid) experimental, (red, dotted) simulation

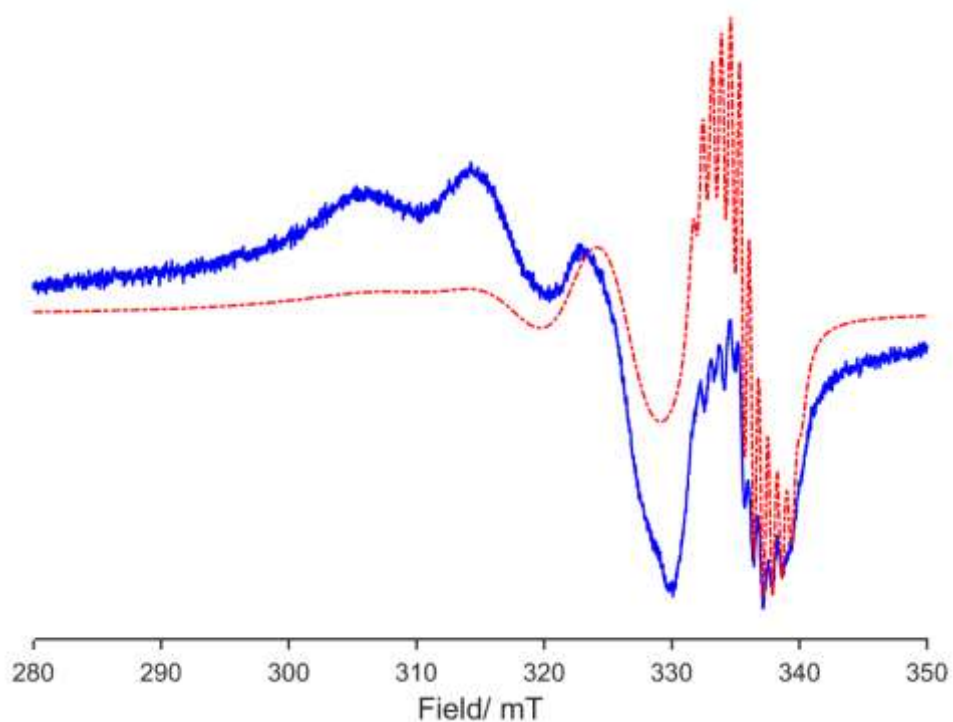

**Figure S15** CW X-band EPR spectrum ( $T = 290$  K) of *SS-CuL2* with phenylacetylene; (blue, solid) experimental, (red, dotted) simulation

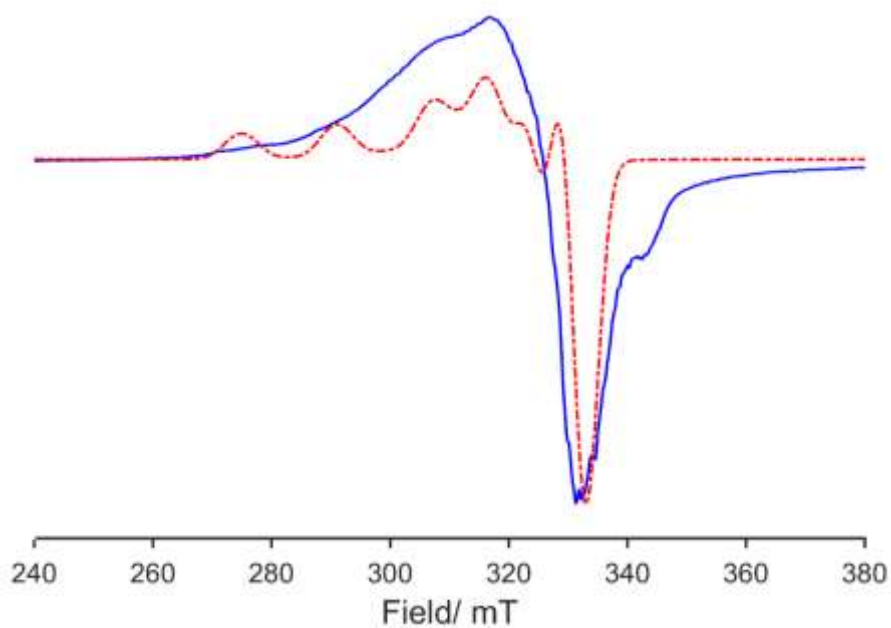

**Figure S16** CW X-band EPR spectrum ( $T = 120$  K) of *SS-CuL2* with phenylacetylene; (blue, solid) experimental, (red, dotted) simulation

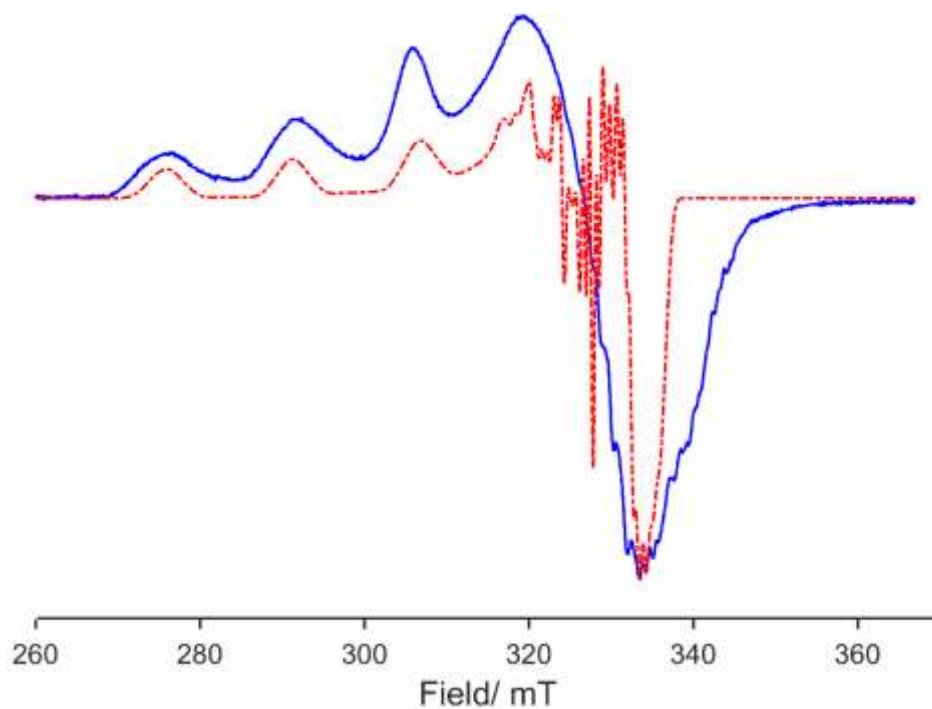

**Figure S17** CW X-band EPR spectrum (T = 120 K) of SS-CuL2 with pyrrolidine + cyclohexanecarboxaldehyde; (blue, solid) experimental, (red, dotted) simulation

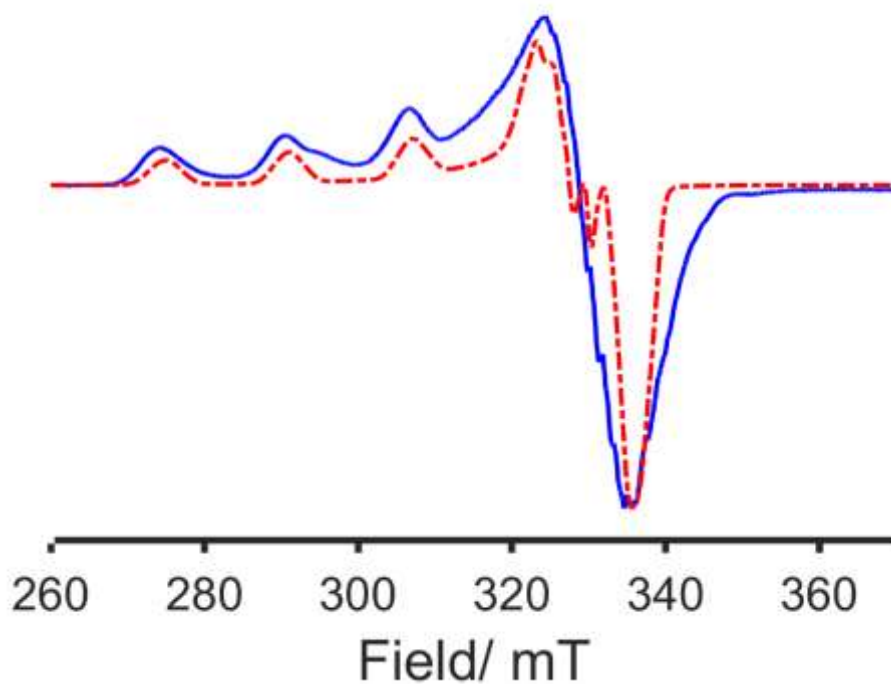

**Figure S18** CW X-band EPR spectrum (T = 120 K) of SS-CuL2 with complete A<sup>3</sup> coupling substrates; (blue, solid) experimental, (red, dotted) simulation

## Catalysis

### Standard procedure for synthesis of propargylamines

Aldehyde (1.5 mmol, 1.5 eq.), amine (1.5 mmol, 1.5 eq.), alkyne (1.0 mmol, 1.0 eq.) and Cu catalyst (2 mol%, based on aldehyde) were placed in a 25 ml ball mill Teflon jar with two Ceramic medium size balls and mixed for 180 minutes. Then, the mixture was extracted with CH<sub>2</sub>Cl<sub>2</sub> (2 mL) and filtered through a metal scavenger. The resultant solution was concentrated under reduced pressure, and the resulting oily residue was then loaded into flash column chromatography. The product was isolated through silica gel using a diethyl ether/petroleum ether (fraction 40-60) mixture as the gradient eluent (99:01-30:70 v/v) to afford pure propargylamines (**1** - **23**). Propargylamine **24** can be synthesised under microwave irradiation in a gram scale (Method A) and mechanochemically up to 500 mg scale (Method B).

### Method A

Inside a 25 ml microwave vial 4-(N-BOC-amino)piperidine (5314.9 mg, 1.0 eq), cyclohexanecarboxaldehyde (3213.7  $\mu$ L, 1.0 eq) and CuBr<sub>2</sub> (591.6 mg, 0.1 eq) were suspended in MeCN (15 ml). The mixture was sonicated for 15 minutes leading to the formation of a pale blue suspension which was then treated with 3-butyn-1-ol (2000  $\mu$ L, 1.0 eq) and irradiated in a Biotage Initiator microwave reactor at 60°C for 3 hours. Upon completion a brown solution had formed which was diluted with aq. NaHCO<sub>3</sub> (20 ml). This mixture was extracted into DCM (3 x 20 ml) and the combined organics were washed with aq. NaHCO<sub>3</sub> (3 x 30 ml) until the aqueous layer was clear and colourless. The organics were dried over MgSO<sub>4</sub> and concentrated to residue which was dissolved in minimal MeOH and passed through a Isolute Si-Thiol column. The filtrate was concentrated yielding a pale yellow, viscous oil. The oil was further purified by column chromatography (80g SiO<sub>2</sub>, hexanes: ethyl acetate. 100% hexanes to 100% ethyl acetate over 22 minutes).

### Method B

Aldehyde (1.0 mmol, 1.0 eq.), amine (1.0 mmol, 1.0 eq.), alkyne (1.0 mmol, 1.0 eq.) Cu catalyst (2 mol%, based on aldehyde) and 0.1 mL of CH<sub>3</sub>CN were placed in a 25 ml ball mill Teflon jar with two Ceramic medium size balls and mixed for 180 minutes. Then, the mixture was extracted with CH<sub>2</sub>Cl<sub>2</sub> (2 mL) and filtered through a metal scavenger.

**Table S6.** Optimisation table for propargylamine synthesis

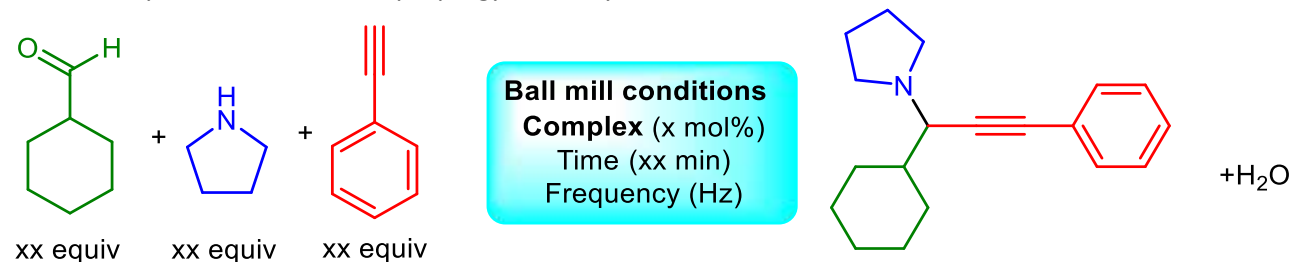

| Entry | Aldehyde (mmol) | Amine (mmol) | Alkyne (mmol) | Complex (% mol) | Time   | Frequency (Hz) | Yield (%) |
|-------|-----------------|--------------|---------------|-----------------|--------|----------------|-----------|
| 1     | 1.0             | 1.1          | 1.2           | 2               | 30 min | 25             | 34        |
| 2     | 1.0             | 1.1          | 1.2           | 5               | 60 min | 25             | 52        |
| 3     | 1.0             | 1.1          | 1.2           | 7               | 99 min | 25             | 59        |
| 4     | 1               | 1            | 1             | 5               | 2 hr   | 25             | 72        |
| 5     | 1.2             | 1.1          | 1.0           | 5               | 2 hr   | 25             | 81        |
| 6     | 1.5             | 1.5          | 1.0           | 2               | 2 hr   | 25             | 89        |
| 7     | 1.5             | 1.5          | 1.0           | 2               | 3 hr   | 25             | 95        |
| 8     | 0.75            | 0.75         | 1             | 2               | 3 hr   | 25             | 28        |

## NMR figures with impurities / control experiments

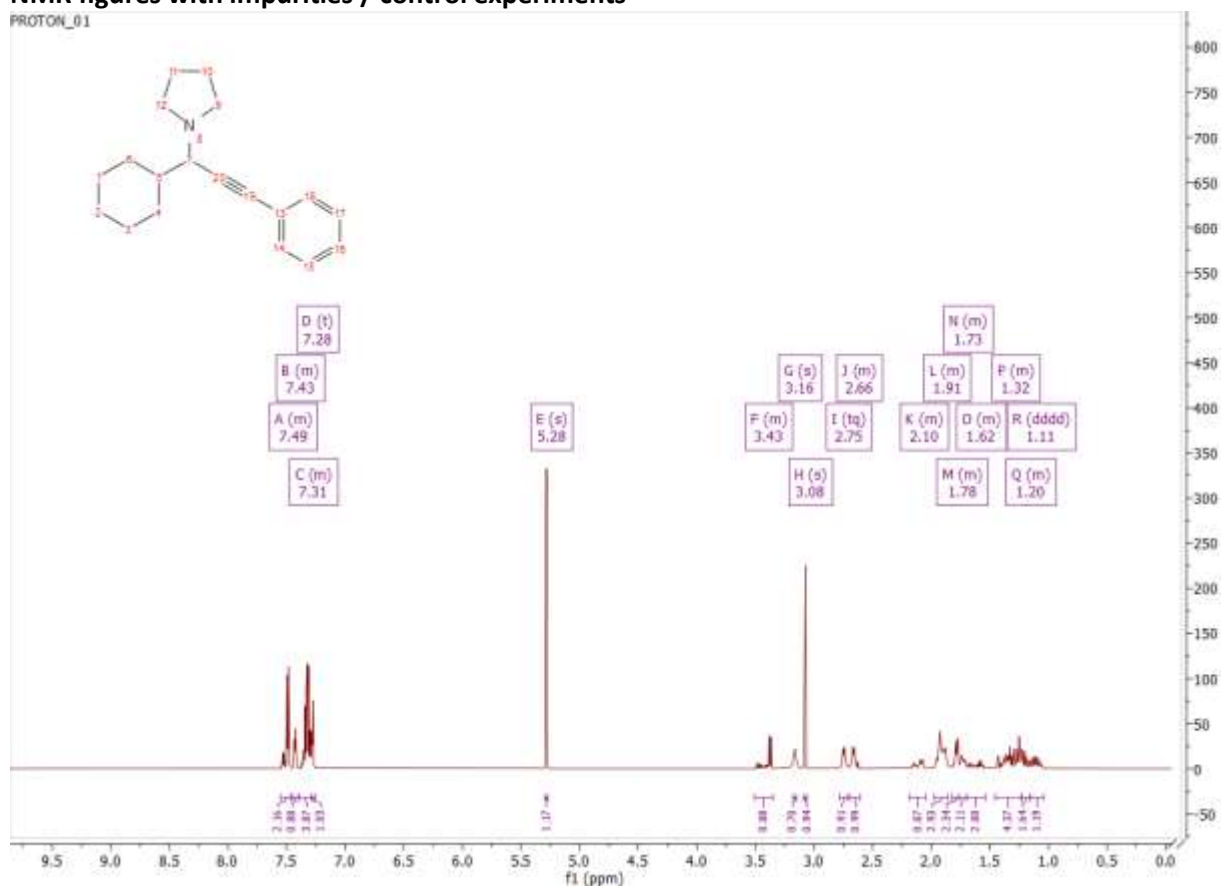

Figure S19. Crude  $^1\text{H}$  NMR of reaction entry 1, Table 2

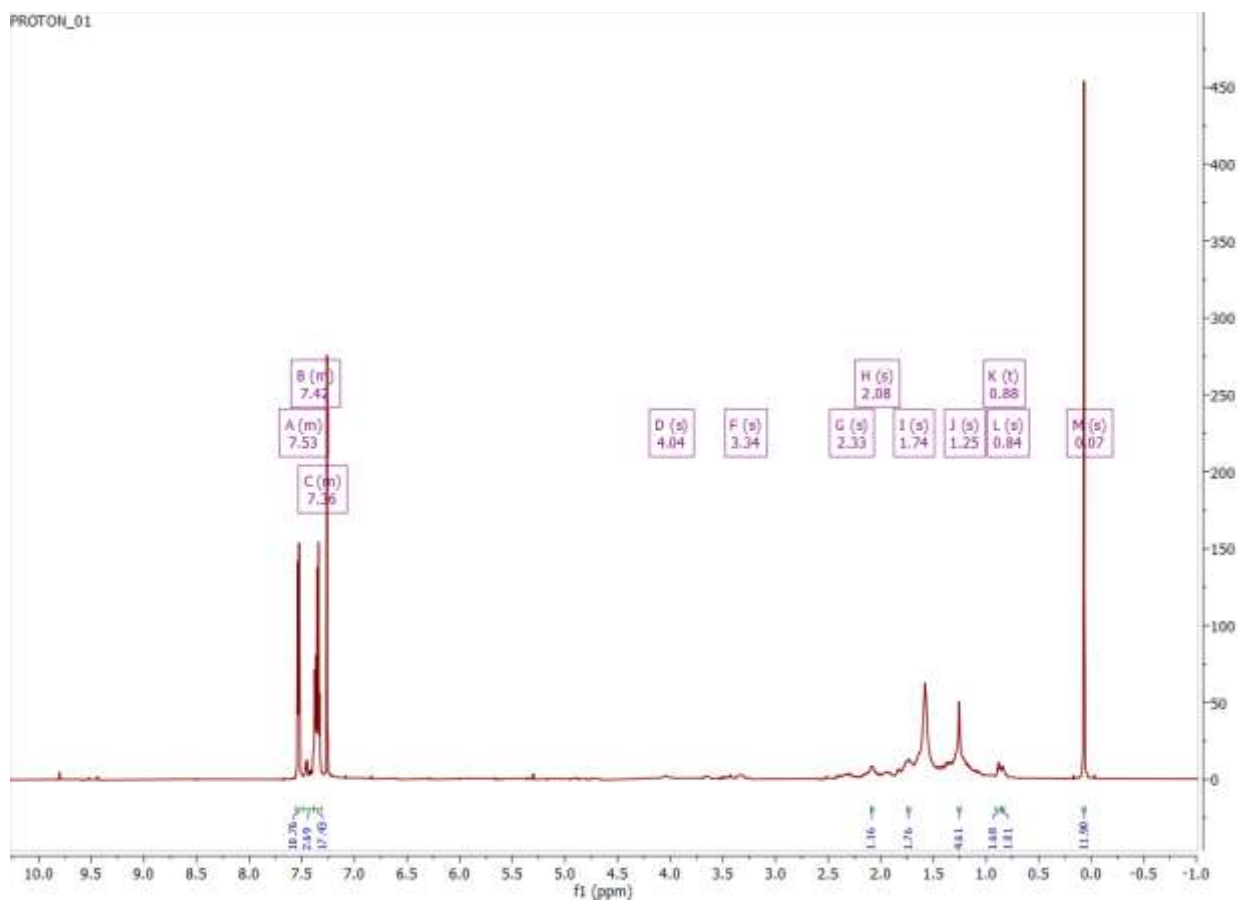

Figure S20. Crude  $^1\text{H}$  NMR of the reaction with  $\text{CuCl}_2$  (2% loading) entry 12, Table 2

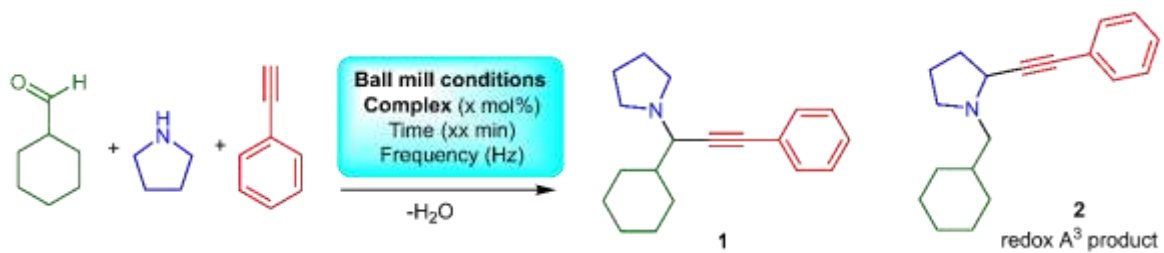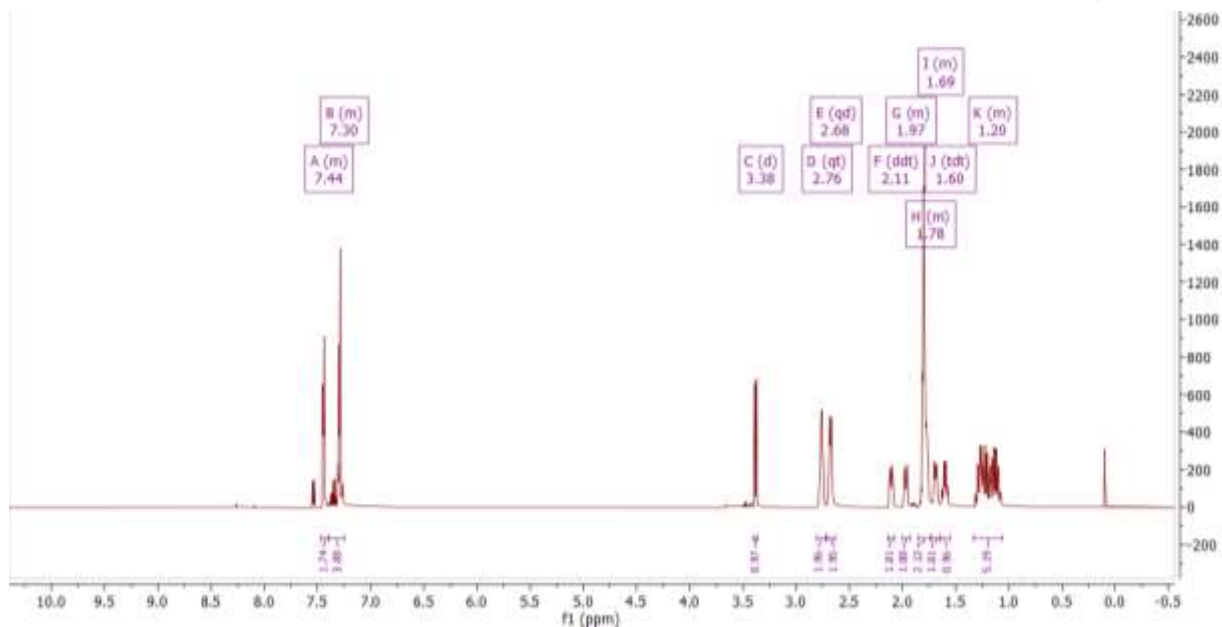

**Figure S21.** The crude <sup>1</sup>H NMR of the reaction with CuCl<sub>2</sub> (20% loading) entry 14, Table 2

## Enantiomeric determination

Sample ID : US18

Method Name : C:\CHEM32\1\METHODS\B\HEX\_IPA\_9802\_10.M

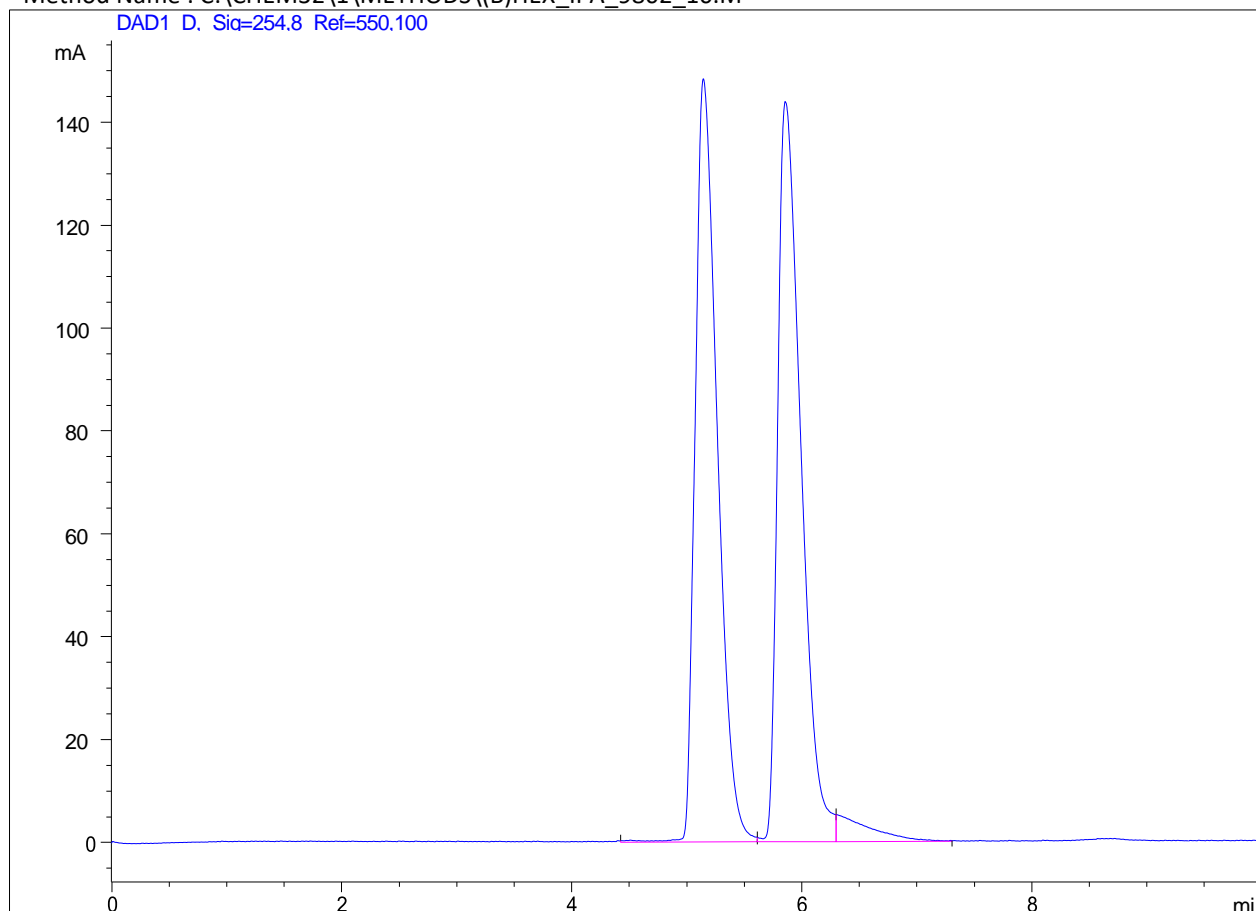

| # | Meas. R | Height | Width | Area | Area % | Symmetry |
|---|---------|--------|-------|------|--------|----------|
|---|---------|--------|-------|------|--------|----------|

|   |       |         |       |         |        |       |
|---|-------|---------|-------|---------|--------|-------|
| 1 | 5.157 | 1.488e3 | 0.220 | 1.990e4 | 48.161 | 0.715 |
| 2 | 5.853 | 1.440e3 | 0.235 | 2.032e4 | 49.186 | 0.461 |
| 3 | 6.300 | 53.220  | 0.343 | 1.096e3 | 2.654  | 0.000 |

Figure S22. HPLC profile for entry 11, Table 2



Sample ID : US20

Method Name : C:\CHEM32\1\METHODS\B\HEX\_IPA\_9802\_10.M

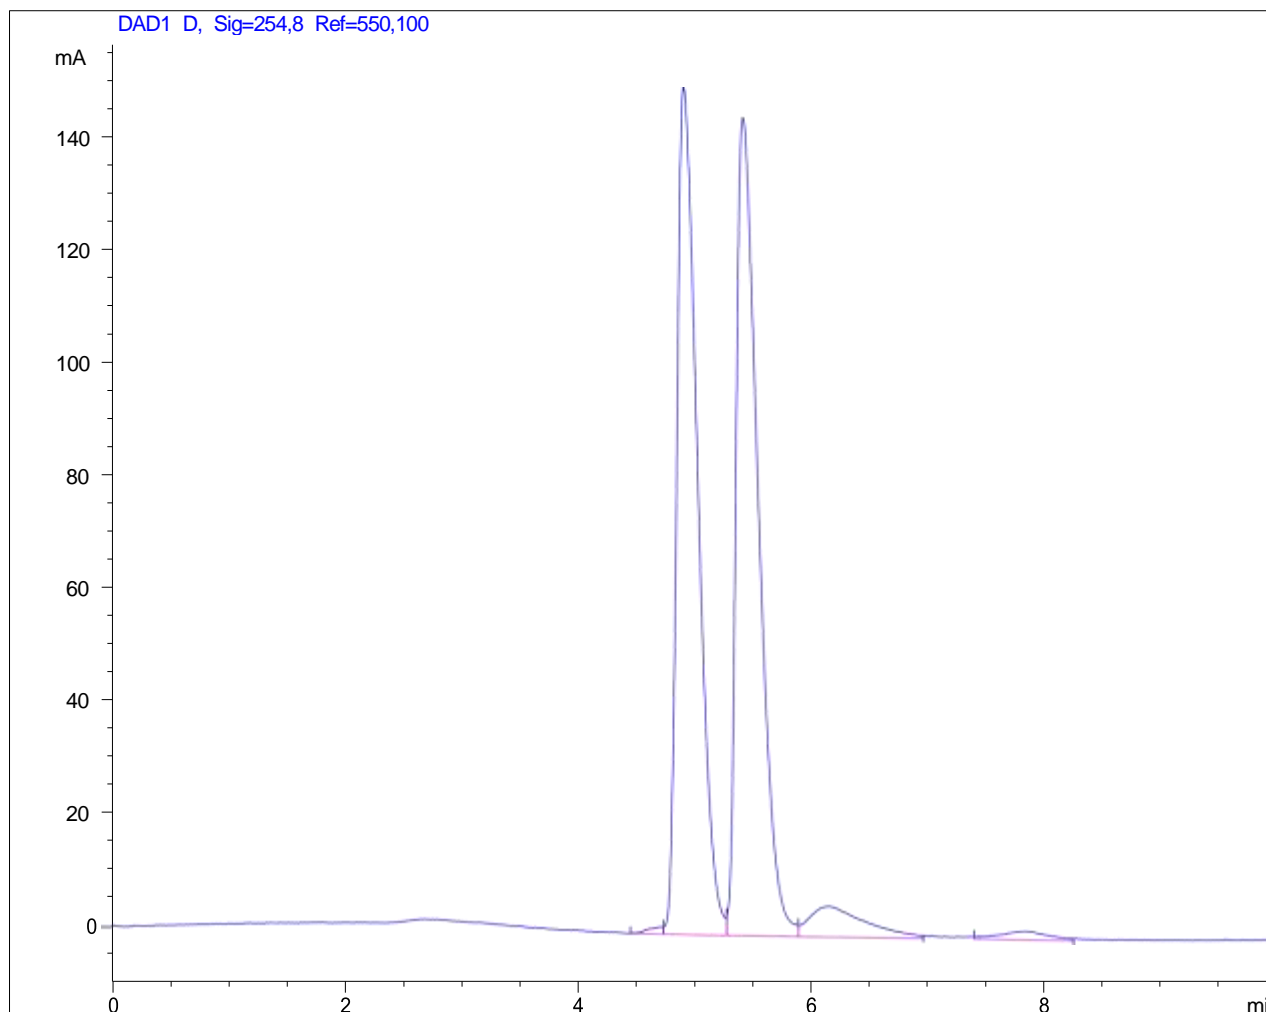

# Meas. R Height Width Area Area % Symmetry

---

|   |       |         |       |         |        |       |
|---|-------|---------|-------|---------|--------|-------|
| 1 | 4.736 | 14.179  | 0.155 | 132.211 | 0.327  | 0.000 |
| 2 | 4.904 | 1.503e3 | 0.208 | 1.874e4 | 46.402 | 0.439 |
| 3 | 5.416 | 1.450e3 | 0.221 | 1.921e4 | 47.559 | 0.424 |
| 4 | 6.154 | 54.531  | 0.557 | 1.822e3 | 4.510  | 0.505 |
| 5 | 7.840 | 16.118  | 0.502 | 485.355 | 1.202  | 1.043 |

---

Figure S23. HPLC profile for entry 21, Table 2

Sample ID : US23

Method Name : C:\CHEM32\1\METHODS\B\HEX\_IPA\_9802\_10.M

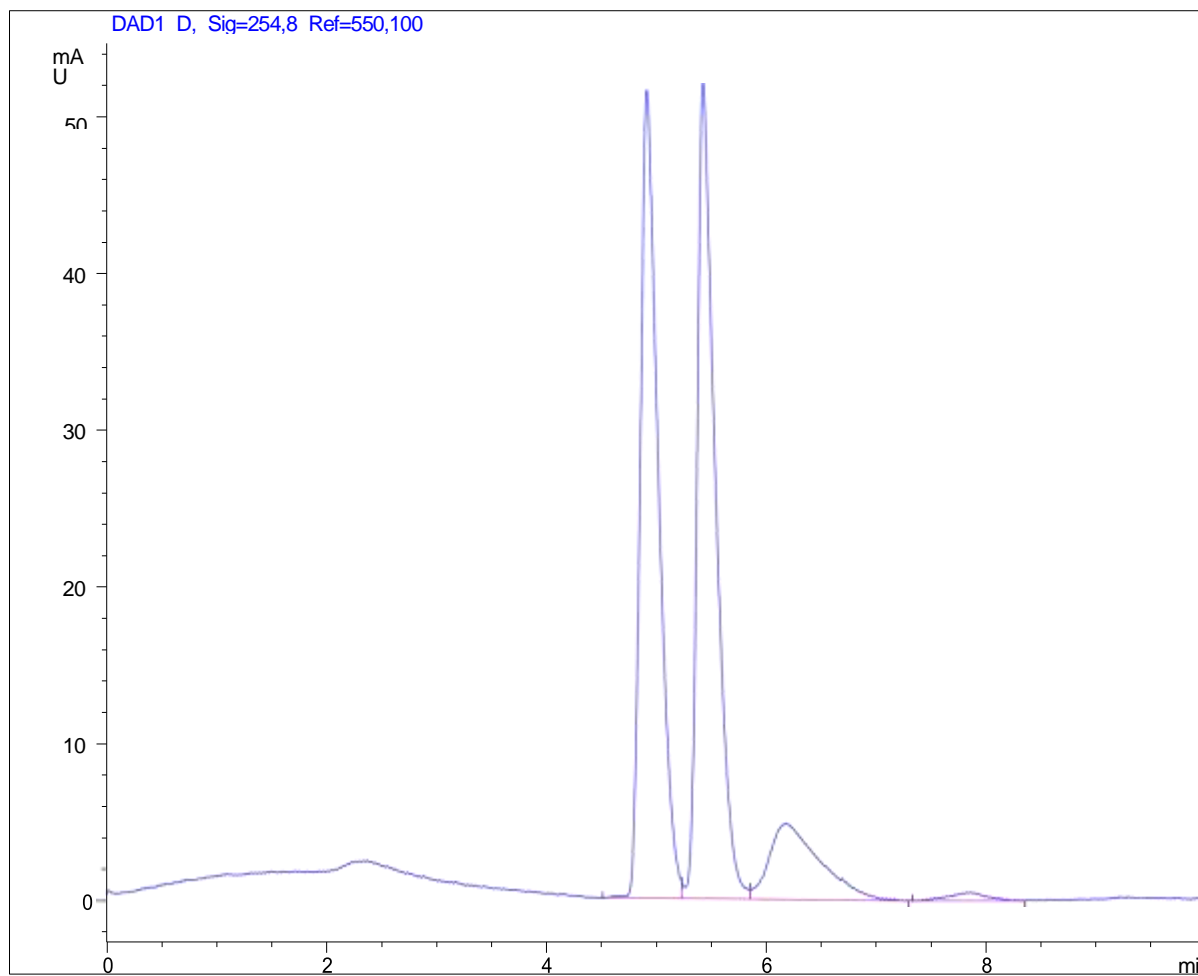

# Meas. R Height Width Area Area % Symmetr

---

|   |       |         |       |         |        |       |
|---|-------|---------|-------|---------|--------|-------|
| 1 | 4.927 | 490.633 | 0.188 | 5.883e3 | 43.407 | 0.724 |
| 2 | 5.442 | 503.405 | 0.186 | 5.974e3 | 44.080 | 0.642 |
| 3 | 6.184 | 48.343  | 0.465 | 1.561e3 | 11.516 | 0.485 |
| 4 | 7.844 | 5.128   | 0.380 | 135.170 | 0.997  | 1.159 |

---

Figure S24. HPLC profile for entry 22, Table 2

Sample ID : US21

Method Name : C:\CHEM32\1\METHODS\B\HEX\_IPA\_9802\_10.M

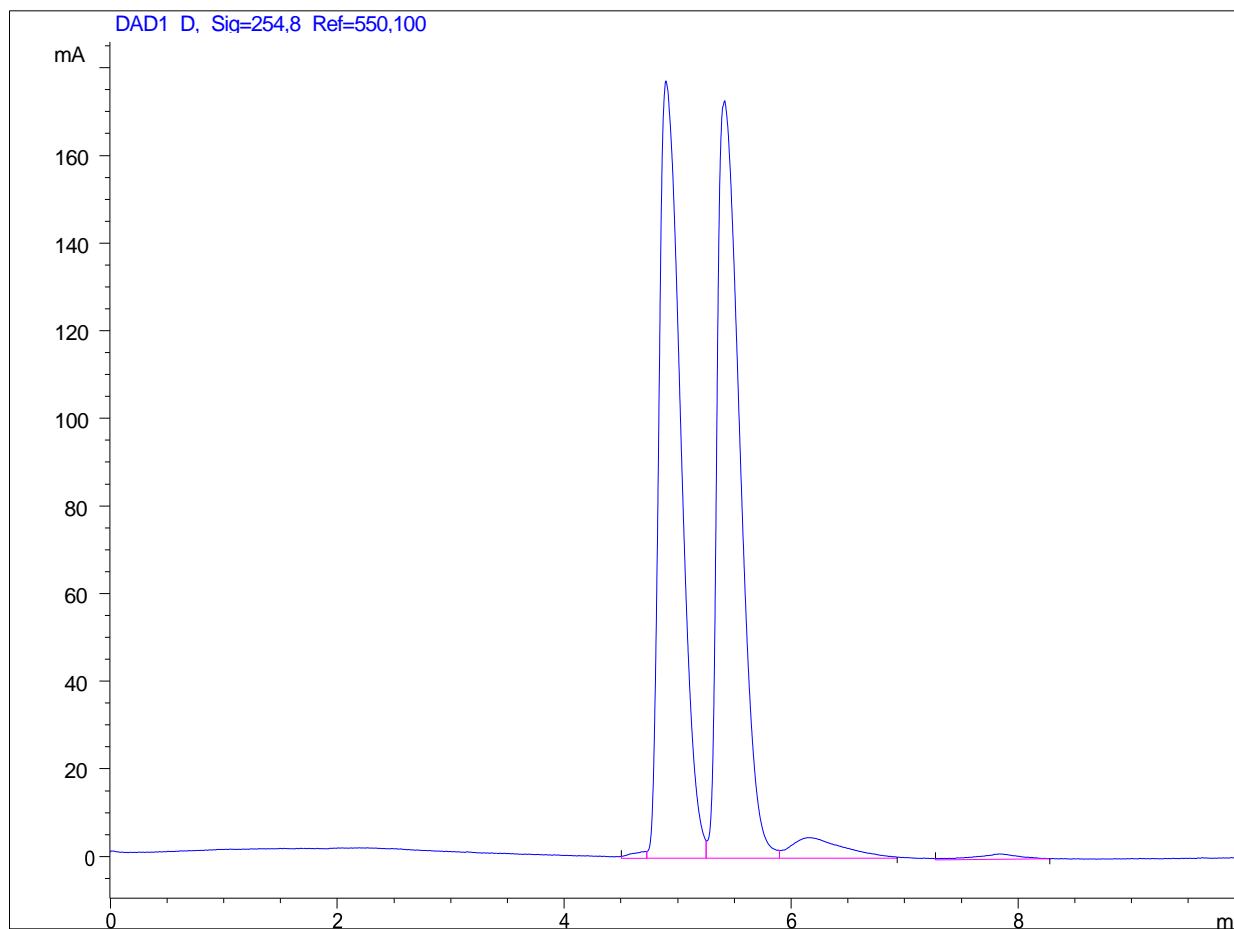

# Meas. R Height Width Area Area % Symmetr

| # | Meas. R | Height  | Width | Area    | Area % | Symmetr |
|---|---------|---------|-------|---------|--------|---------|
| 1 | 4.724   | 15.446  | 0.156 | 144.641 | 0.292  | 0.000   |
| 2 | 4.894   | 1.774e3 | 0.221 | 2.353e4 | 47.428 | 0.467   |
| 3 | 5.411   | 1.729e3 | 0.232 | 2.406e4 | 48.497 | 0.483   |
| 4 | 6.147   | 47.023  | 0.539 | 1.520e3 | 3.064  | 0.472   |
| 5 | 7.832   | 12.431  | 0.478 | 356.712 | 0.719  | 1.283   |

Figure S25. HPLC profile for entry 23, Table 2

Sample ID : US24

Method Name : C:\CHEM32\1\METHODS\B\HEX\_IPA\_9802\_10.M

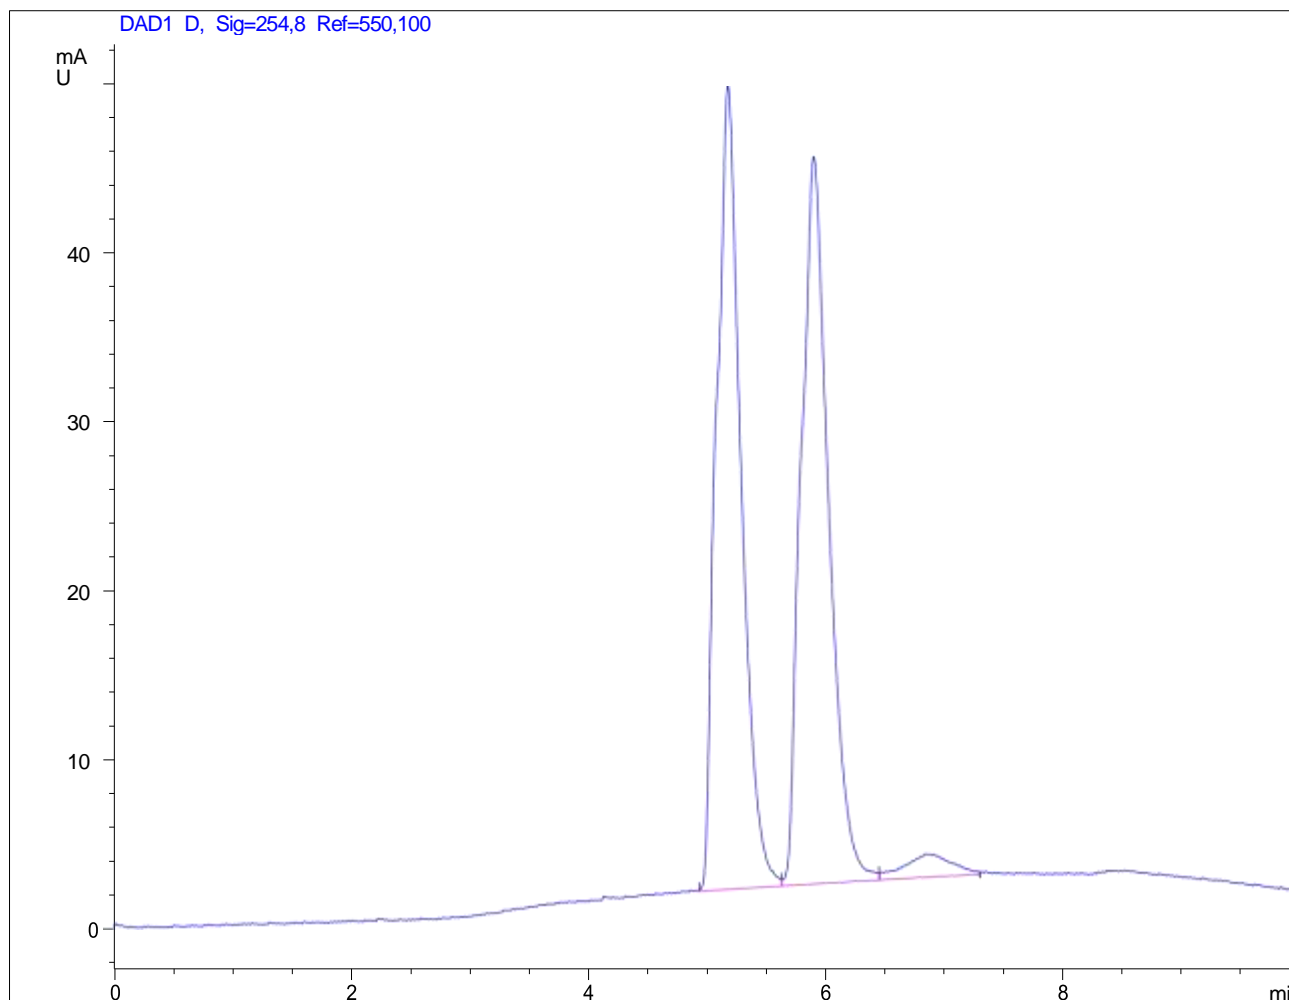

# Meas. R Height Width Area Area % Symmetr

---

|   |       |         |       |         |        |       |
|---|-------|---------|-------|---------|--------|-------|
| 1 | 5.172 | 474.798 | 0.242 | 6.898e3 | 48.321 | 0.822 |
| 2 | 5.896 | 430.134 | 0.270 | 6.980e3 | 48.896 | 0.795 |
| 3 | 6.839 | 13.974  | 0.474 | 397.295 | 2.783  | 0.871 |

---

Figure S26. HPLC profile for entry 24, Table 2

### Characterisation for the A<sup>3</sup> Coupling products.

#### 1-(1-cyclohexyl-3-phenylprop-2-yn-1-yl) pyrrolidine

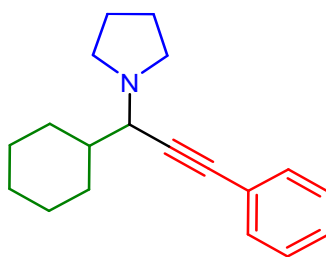

1-(1-cyclohexyl-3-phenylprop-2-yn-1-yl) pyrrolidine, (**1**), was synthesised using the standard procedure. Yellow oil (264 mg average of 262-265 mg, 0.99 mmol 99%); <sup>1</sup>H NMR (600 MHz, CDCl<sub>3</sub>) δ 7.43 (dd, *J* = 7.1, 2.5 Hz, 2H), 7.29 (h, *J* = 3.7 Hz, 3H), 3.35 (d, *J* = 8.4 Hz, 1H), 2.73 (dd, *J* = 8.6, 5.2 Hz, 2H), 2.64 (dd, *J* = 10.0, 4.9 Hz, 2H), 2.09 (dt, *J* = 13.0, 3.3 Hz, 1H), 1.98 – 1.92 (m, 1H), 1.84 – 1.73 (m, 6H), 1.70 – 1.65 (m, 1H), 1.59 (ditty, *J* = 11.5, 8.2, 3.8 Hz, 1H), 1.32 – 1.04 (m, 5H). <sup>13</sup>C NMR (151 MHz, CDCl<sub>3</sub>) δ 131.7, 128.2, 127.7, 123.6, 87.9, 85.7, 61.3, 41.3, 30.7, 30.3, 26.7, 26.2 (d, *J* = 3.2 Hz), 23.5; (HRMS + pTOF-ES) calcd C<sub>19</sub>H<sub>26</sub>N = [M + H]<sup>+</sup>: 268.2065, observed: 268.2065.

#### 1-(1-cyclohexyl-3-phenylprop-2-yn-1-yl)piperidine

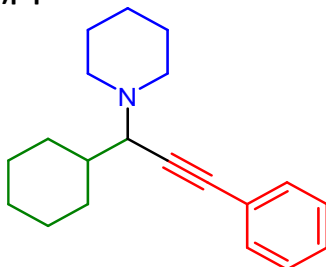

1-(1-cyclohexyl-3-phenylprop-2-yn-1-yl)piperidine, (**2**) was synthesised using the standard procedure. Dark Yellow oil (273 mg, average of 270-276 mg, 0.97 mmol 97%); <sup>1</sup>H NMR (600 MHz, CDCl<sub>3</sub>) δ 7.46 – 7.41 (m, 2H), 7.32 – 7.24 (m, 3H), 3.12 (d, *J* = 9.8 Hz, 1H), 2.64 (td, *J* = 9.0, 7.0, 3.7 Hz, 2H), 2.42 (d, *J* = 9.8 Hz, 2H), 2.11 (ddt, *J* = 12.5, 3.7, 1.8 Hz, 1H), 2.07 – 2.01 (m, 1H), 1.80 – 1.70 (m, 2H), 1.72 – 1.63 (m, 1H), 1.63 – 1.59 (m, 2H), 1.59 – 1.53 (m, 1H), 1.44 (dq, *J* = 9.4, 4.9, 4.0 Hz, 2H), 1.37 – 1.10 (m, 3H), 1.03 (qd, *J* = 12.6, 3.6 Hz, 1H), 0.99 – 0.89 (m, 1H). <sup>13</sup>C NMR (151 MHz, CDCl<sub>3</sub>) δ 131.7, 128.2, 127.6, 123.8, 87.8, 86.1, 64.4, 39.5, 31.3, 30.4, 26.8, 26.3 (d, *J* = 2.7 Hz), 26.1, 24.7; (HRMS + pTOF-ES) calcd C<sub>20</sub>H<sub>28</sub>N = [M + H]<sup>+</sup>: 282.2222, observed: 282.2235.

#### 4-(1-cyclohexyl-3-phenylprop-2-yn-1-yl)morpholine

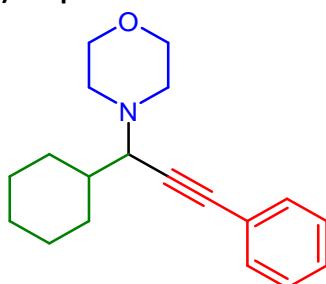

4-(1-cyclohexyl-3-phenylprop-2-yn-1-yl)morpholine, (**3**), was synthesised using the standard procedure. Yellow oil (194 mg, average of 175-212 mg, 0.68 mmol 68%); <sup>1</sup>H NMR (600 MHz, CDCl<sub>3</sub>) δ 7.46 – 7.41 (m, 2H), 7.33 – 7.26 (m, 3H), 3.80 – 3.69 (m, 4H), 3.13 (d, *J* = 9.9 Hz, 1H), 2.70 (ddd, *J* = 10.4, 6.1, 3.0 Hz, 2H), 2.51 (ddd, *J* = 11.4, 6.1, 3.2 Hz, 2H), 2.14 – 2.07 (m, 1H), 2.07 – 2.01 (m, 1H), 1.77 (ddd, *J* = 17.4, 8.3, 3.5 Hz, 2H), 1.71 – 1.65 (m, 1H), 1.60 (dtd, *J* = 14.6, 11.1, 3.5 Hz, 1H), 1.34 – 1.22 (m, 1H), 1.25 – 1.18 (m, 1H), 1.18 (dt, *J* = 9.6, 3.3 Hz, 1H), 1.05 (qd, *J* = 12.5, 3.5 Hz, 1H), 0.97 (qd, *J* = 12.4, 3.7 Hz, 1H); <sup>13</sup>C NMR (151 MHz, CDCl<sub>3</sub>) δ 131.7, 128.2, 127.8, 123.4, 86.7, 86.6, 67.2, 63.9, 39.0, 31.0, 30.3, 26.7, 26.2; (HRMS + pTOF-ES) calcd C<sub>19</sub>H<sub>26</sub>NO = [M + H]<sup>+</sup>: 284.2014, observed: 284.1014

#### 1-(1-cyclohexyl-3-phenylprop-2-yn-1-yl)azepane

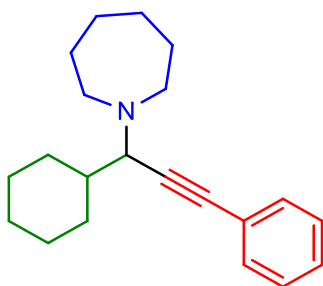

1-(1-cyclohexyl-3-phenylprop-2-yn-1-yl)azepane (**4**) was synthesised using the standard procedure. Yellow oil (244 mg, average of 238-250 mg, 0.83 mmol 83%);  $^1\text{H}$  NMR (600 MHz,  $\text{CDCl}_3$ )  $\delta$  7.43 – 7.39 (m, 3H), 7.31 – 7.24 (m, 5H), 3.65 (dd,  $J = 8.8, 6.0$  Hz, 2H), 3.46 (s, 1H), 3.54 – 3.40 (m, 1H), 2.79 – 2.67 (m, 4H), 2.70 – 2.60 (m, 4H), 2.47 – 2.34 (m, 1H), 2.25 (dd,  $J = 9.4, 6.9$  Hz, 1H), 1.92 (dtd,  $J = 11.9, 9.4, 9.0, 6.4$  Hz, 1H), 1.86 – 1.64 (m, 11H), 1.63 – 1.56 (m, 1H), 1.55 (dq,  $J = 8.6, 6.0, 4.2$  Hz, 1H), 1.52 – 1.46 (m, 1H), 1.48 – 1.38 (m, 1H), 1.33 (tdd,  $J = 8.4, 6.7, 3.9$  Hz, 8H), 1.31 – 1.20 (m, 1H), 0.95 – 0.80 (m, 11H), 0.82 (s, 1H).  $^{13}\text{C}$  NMR (151 MHz,  $\text{CDCl}_3$ )  $\delta$  131.8, 128.3, 127.6, 124.1, 89.1, 85.0, 77.4, 76.9, 65.4, 52.8, 41.0, 31.3, 30.8, 29.4, 27.3, 27.0, 26.4, 26.2. (HRMS + pTOF-ES) calcd  $\text{C}_{21}\text{H}_{30}\text{N} = [\text{M} + \text{H}]^+$ : 296.2065, observed: 296.2057.

#### 1-(1-phenyloct-1-yn-3-yl) pyrrolidine

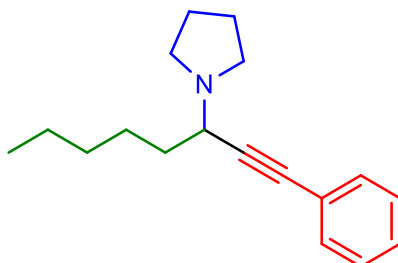

1-(1-phenyloct-1-yn-3-yl) pyrrolidine (**5**) was synthesised using the standard procedure. Yellow oil (238 mg, average of 231-244 mg, 0.93 mmol 93%);  $^1\text{H}$  NMR (600 MHz,  $\text{CDCl}_3$ )  $\delta$  7.43 – 7.39 (m, 3H), 7.31 – 7.24 (m, 5H), 3.65 (dd,  $J = 8.8, 6.0$  Hz, 2H), 3.46 (s, 1H), 3.54 – 3.40 (m, 1H), 2.79 – 2.67 (m, 4H), 2.70 – 2.60 (m, 4H), 2.47 – 2.34 (m, 1H), 2.25 (dd,  $J = 9.4, 6.9$  Hz, 1H), 1.92 (dtd,  $J = 11.9, 9.4, 9.0, 6.4$  Hz, 1H), 1.86 – 1.64 (m, 11H), 1.63 – 1.56 (m, 1H), 1.55 (dq,  $J = 8.6, 6.0, 4.2$  Hz, 1H), 1.52 – 1.46 (m, 1H), 1.48 – 1.38 (m, 1H), 1.33 (tdd,  $J = 8.4, 6.7, 3.9$  Hz, 8H), 1.31 – 1.20 (m, 1H), 0.95 – 0.80 (m, 11H), 0.82 (s, 1H).  $^{13}\text{C}$  NMR (151 MHz,  $\text{CDCl}_3$ )  $\delta$  131.9, 128.3, 127.9, 123.7, 88.5, 85.4, 55.3, 54.7, 49.9, 46.7, 45.7, 35.2, 31.8, 26.6, 23.7, 22.7, 14.2. (HRMS + pTOF-ES) calcd  $\text{C}_{18}\text{H}_{26}\text{N} = [\text{M} + \text{H}]^+$ : 256.2065, observed: 256.2057.

#### 1-(1-phenyloct-1-yn-3-yl)azepane

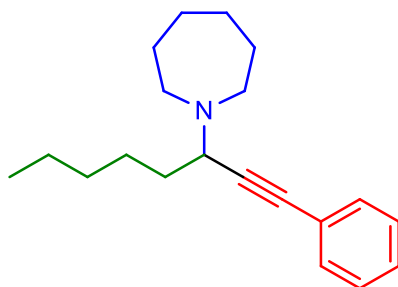

1-(1-phenyloct-1-yn-3-yl)azepane (**6**) was synthesised using the standard procedure. Yellow oil (274 mg, average of 268-280 mg, 0.97 mmol 97%);  $^1\text{H}$  NMR (600 MHz,  $\text{CDCl}_3$ )  $\delta$  7.43 – 7.38 (m, 2H), 7.31 – 7.23 (m, 3H), 3.51 (dd,  $J = 8.5, 6.5$  Hz, 1H), 3.47 (s, 1H), 2.81 (ddd,  $J = 12.7, 7.1, 3.6$  Hz, 2H), 2.62 (ddd,  $J = 12.5, 7.8, 3.9$  Hz, 2H), 1.68 (ddd,  $J = 13.5, 6.6, 3.2$  Hz, 2H), 1.67 – 1.58 (m, 2H), 1.58 (dd,  $J = 6.1, 3.1$  Hz, 3H), 1.56 – 1.38 (m, 2H), 1.32 (tt,  $J = 6.1, 2.7$  Hz, 4H), 0.89 (t,  $J = 6.9$  Hz, 3H).  $^{13}\text{C}$  NMR (151 MHz,  $\text{CDCl}_3$ )  $\delta$  131.9, 128.3, 127.9, 123.7, 88.5, 85.4, 55.3, 54.7, 49.9, 46.7, 45.7, 35.2, 31.8, 26.6, 23.7, 22.7, 14.2. (HRMS + pTOF-ES) calcd  $\text{C}_{20}\text{H}_{30}\text{N} = [\text{M} + \text{H}]^+$ : 284.2378, observed: 284.2378.

#### 4-(1-phenyloct-1-yn-3-yl)morpholine

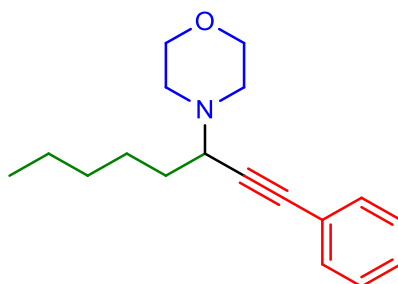

4-(1-phenyloct-1-yn-3-yl) morpholine (**7**) was synthesised using the standard procedure. Yellow oil (185 mg, average of 176-195 mg, 0.68mmol 68%);  $^1\text{H}$  NMR (600 MHz,  $\text{CDCl}_3$ )  $\delta$  7.42 (dd,  $J$  = 6.6, 3.0 Hz, 2H), 7.32 – 7.24 (m, 3H), 3.81 – 3.61 (m, 5H), 3.50 – 3.45 (m, 1H), 2.92 – 2.87 (m, 1H), 2.73 (ddd,  $J$  = 11.4, 6.3, 3.2 Hz, 2H), 2.56 (ddd,  $J$  = 11.4, 6.3, 3.2 Hz, 2H), 1.76 – 1.65 (m, 2H), 1.60 – 1.38 (m, 2H), 1.33 (tq,  $J$  = 8.5, 4.3 Hz, 4H), 0.94 – 0.85 (m, 3H).  $^{13}\text{C}$  NMR (151 MHz,  $\text{CDCl}_3$ )  $\delta$  131.9, 130.1, 128.4, 85.6, 85.2, 83.0, 41.0, 34.0, 31.6, 28.6, 26.4, 24.0, 22.7, 20.9, 17.6, 17.4, 14.8, 14.2, 8.1 (HRMS + pTOF-ES) calcd  $\text{C}_{18}\text{H}_{26}\text{NO}$  =  $[\text{M} + \text{H}]^+$ : 272.2014, observed: 272.2016.

#### N,N-diallyl-1-phenyloct-1-yn-3-amine

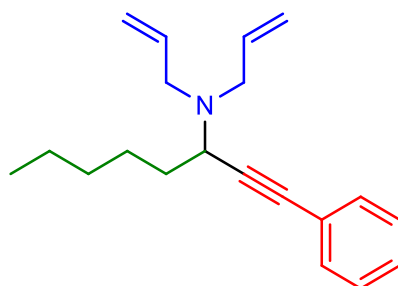

N,N-diallyl-1-phenyloct-1-yn-3-amine (**8**) was synthesised using the standard procedure. Yellow oil (245 mg, average of 248-260 mg, 0.90 mmol 90%);  $^1\text{H}$  NMR (600 MHz,  $\text{CDCl}_3$ )  $\delta$  7.48 – 7.43 (m, 2H), 7.35 – 7.27 (m, 3H), 5.89 (dddd,  $J$  = 17.7, 10.1, 7.9, 4.7 Hz, 2H), 5.29 (q,  $J$  = 1.7 Hz, 1H), 5.26 (q,  $J$  = 1.7 Hz, 1H), 5.15 (dd,  $J$  = 10.2, 2.1 Hz, 2H), 3.75 (t,  $J$  = 7.6 Hz, 1H), 3.37 (ddt,  $J$  = 14.2, 4.3, 1.9 Hz, 2H), 3.03 (dd,  $J$  = 14.2, 7.9 Hz, 2H), 1.77 – 1.69 (m, 2H), 1.58 – 1.44 (m, 2H), 1.35 (dddd,  $J$  = 12.6, 9.3, 6.7, 3.7 Hz, 4H), 0.93 (t,  $J$  = 6.9 Hz, 3H).  $^{13}\text{C}$  NMR (151 MHz,  $\text{CDCl}_3$ )  $\delta$  136.8, 131.8, 128.3, 127.9, 123.7, 117.1, 88.5, 85.1, 76.9, 54.1, 53.2, 34.0, 31.7, 26.4, 22.7, 14.2. (HRMS + pTOF-ES) calcd  $\text{C}_{20}\text{H}_{28}\text{N}$  =  $[\text{M} + \text{H}]^+$ : 282.2014, observed: 282.2223.

#### 4-(1-cyclohexyl-3-(4-methoxyphenyl)prop-2-yn-1-yl)morpholine

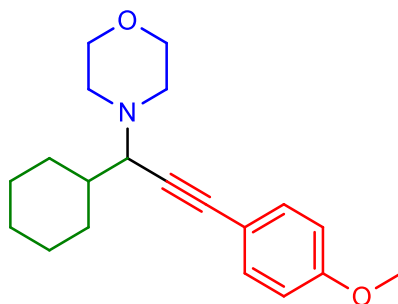

4-(1-cyclohexyl-3-(4-methoxyphenyl)prop-2-yn-1-yl)morpholine (**9**) was synthesised using the standard procedure. Yellow oil (228 mg, average of 215-240 mg, 0.73mmol 73%);  $^1\text{H}$  NMR (600 MHz,  $\text{CDCl}_3$ )  $\delta$  7.39 – 7.33 (m, 2H), 6.84 – 6.79 (m, 2H), 3.79 (s, 3H), 3.78 – 3.68 (m, 4H), 3.10 (d,  $J$  = 9.8 Hz, 1H), 2.68 (t,  $J$  = 9.4 Hz, 2H), 2.49 (ddd,  $J$  = 11.2, 6.2, 3.0 Hz, 2H), 2.09 (ddt,  $J$  = 13.0, 3.6, 1.7 Hz, 1H), 2.06 – 1.99 (m, 1H), 1.79 – 1.71 (m, 1H), 1.70 – 1.63 (m, 1H), 1.63 – 1.55 (m, 1H), 1.26 (qt,  $J$  = 12.8, 3.5 Hz, 1H), 1.23 – 1.14 (m, 2H), 1.03 (qd,  $J$  = 12.2, 3.4 Hz, 1H), 0.95 (q,  $J$  = 11.0, 9.5 Hz, 1H).  $^{13}\text{C}$  NMR (151 MHz,  $\text{CDCl}_3$ )  $\delta$  159.4, 133.2, 115.7, 114.0, 110.2, 86.7, 85.1, 67.4, 64.2, 55.4, 50.1, 39.3, 31.1, 30.6, 26.9, 26.3, 26.2. (HRMS + pTOF-ES) calcd  $\text{C}_{20}\text{H}_{28}\text{NO}$  =  $[\text{M} + \text{H}]^+$ : 314.2119, observed: 314.2119.

#### 1-(1-(4-methoxyphenyl)oct-1-yn-3-yl)pyrrolidine

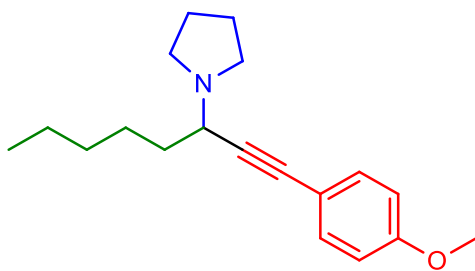

1-(1-(4-methoxyphenyl)oct-1-yn-3-yl)pyrrolidine (**10**) was synthesised using the standard procedure. Yellow oil (262 mg, average of 252-272 mg, 0.92mmol 92%);  $^1\text{H}$  NMR (600 MHz,  $\text{CDCl}_3$ )  $\delta$  7.39 – 7.33 (m, 2H), 6.86 – 6.79 (m, 2H), 3.81 (s, 3H), 3.01 (s, 4H), 1.92 (s, 5H), 1.76 – 1.66 (m, 1H), 1.47 (s, 1H), 1.36 – 1.29 (m, 4H), 0.94 – 0.85 (m, 4H).  $^{13}\text{C}$  NMR (151 MHz,  $\text{CDCl}_3$ )  $\delta$  159.9, 133.4, 114.1, 56.0, 55.5, 50.3, 49.9, 39.6, 34.2, 31.5, 26.4, 23.9, 22.6, 14.1. (HRMS + pTOF-ES) calcd  $\text{C}_{19}\text{H}_{28}\text{NO}$  =  $[\text{M} + \text{H}]^+$ : 286.2170, observed: 286.2171.

#### 4-(1-(4-methoxyphenyl)oct-1-yn-3-yl)morpholine

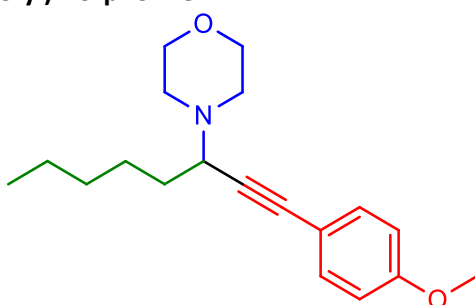

4-(1-(4-methoxyphenyl)oct-1-yn-3-yl)morpholine (**11**) was synthesised using the standard procedure. Yellow oil (220 mg, average of 203-237 mg, 0.73mmol 73%)  $^1\text{H}$  NMR (600 MHz,  $\text{CDCl}_3$ )  $\delta$  7.38 – 7.33 (m, 2H), 6.85 – 6.79 (m, 2H), 3.80 (s, 2H), 3.48 (s, 1H), 3.45 (s, 1H), 2.74 (s, 2H), 2.57 (s, 2H), 1.70 (s, 2H), 1.58 – 1.56 (m, 2H), 1.53 (t,  $J$  = 7.4 Hz, 1H), 1.45 (dt,  $J$  = 13.6, 7.2 Hz, 1H), 1.33 (dp,  $J$  = 8.0, 4.3, 3.6 Hz, 4H), 0.92 – 0.87 (m, 3H).  $^{13}\text{C}$  NMR (151 MHz,  $\text{CDCl}_3$ )  $\delta$  133.3, 114.0, 67.2, 58.5, 55.5, 49.9, 33.0, 31.7, 26.4, 22.7, 14.2. (HRMS + pTOF-ES) calcd  $\text{C}_{19}\text{H}_{28}\text{NO}_2$  =  $[\text{M} + \text{H}]^+$ : 302.2119, observed: 302.2119.

#### 1-(1-cyclohexyl-3-phenylprop-2-yn-1-yl)indoline

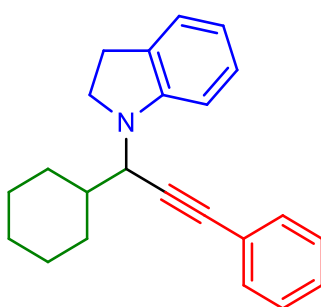

1-(1-cyclohexyl-3-phenylprop-2-yn-1-yl)indoline(**12**) was synthesized using the standard procedure. Yellow oil (259 mg, average of 242-275 mg, 0.82mmol 82%).  $^1\text{H}$  NMR (600 MHz,  $\text{CDCl}_3$ )  $\delta$  7.32 (dd,  $J$  = 6.8, 2.9 Hz, 2H), 7.24 (tt,  $J$  = 5.9, 3.1 Hz, 3H), 7.08 (t,  $J$  = 7.2 Hz, 2H), 6.67 (t,  $J$  = 7.3 Hz, 1H), 6.56 (d,  $J$  = 8.1 Hz, 1H), 4.14 (d,  $J$  = 10.0 Hz, 1H), 3.54 – 3.41 (m, 2H), 3.05 – 3.00 (m, 1H), 3.00 – 2.93 (m, 1H), 2.24 – 2.17 (m, 1H), 2.10 (ddt,  $J$  = 13.5, 3.9, 2.0 Hz, 1H), 1.86 – 1.81 (m, 1H), 1.81 – 1.67 (m, 3H), 1.39 – 1.11 (m, 5H), 1.07 – 0.97 (m, 1H).  $^{13}\text{C}$  NMR (151 MHz,  $\text{CDCl}_3$ )  $\delta$  151.8, 131.9, 130.2, 128.2, 128.0, 127.3, 124.5, 123.4, 118.0, 107.8, 87.1, 85.3, 55.4, 48.4, 41.2, 31.6, 31.1, 30.3, 29.6, 28.5, 26.7, 26.2, 26.1. (HRMS + pTOF-ES) calcd  $\text{C}_{23}\text{H}_{26}\text{N}$  =  $[\text{M} + \text{H}]^+$ : 316.2065, observed: 316.1057.

#### 1-[1-cyclohexyl-3-(4-methoxyphenyl)prop-2-yn-1-yl]pyrrolidine



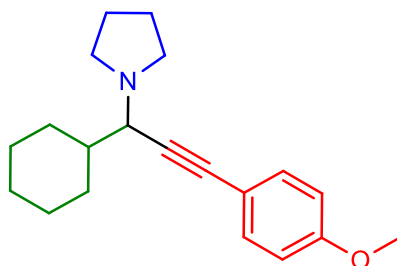

1-[1-cyclohexyl-3-(4-methoxyphenyl)prop-2-yn-1-yl]pyrrolidine (**13**) was synthesised using the standard procedure. Yellow oil (274 mg, average of 266-282 mg, 0.92mmol 92%).  $^1\text{H}$  NMR (600 MHz,  $\text{CDCl}_3$ )  $\delta$  7.40 – 7.33 (m, 2H), 6.86 – 6.79 (m, 2H), 3.80 (s, 2H), 3.33 (d,  $J$  = 8.3 Hz, 1H), 2.72 (t,  $J$  = 7.0 Hz, 2H), 2.64 (p,  $J$  = 5.8 Hz, 2H), 2.11 – 2.04 (m, 1H), 1.98 – 1.91 (m, 1H), 1.78 (q,  $J$  = 4.1, 2.6 Hz, 4H), 1.71 – 1.64 (m, 1H), 1.57 (tdt,  $J$  = 11.6, 8.2, 3.4 Hz, 1H), 1.32 – 1.04 (m, 4H).  $^{13}\text{C}$  NMR (151 MHz,  $\text{CDCl}_3$ )  $\delta$  159.3, 133.2, 116.0, 114.0, 86.4, 85.7, 61.5, 55.4, 50.2, 41.5, 30.9, 30.4, 26.9, 26.4, 26.4, 23. (HRMS + pTOF-ES) calcd  $\text{C}_{20}\text{H}_{28}\text{NO}$  =  $[\text{M} + \text{H}]^+$ : 298.205, observed: 298.1057.

#### 1-[3-(4-chlorophenyl)-1-cyclohexylprop-2-yn-1-yl]pyrrolidine

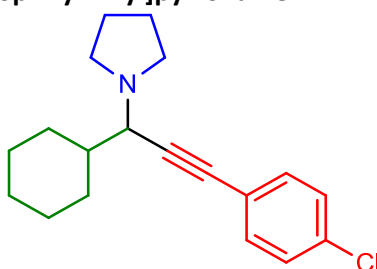

1-[3-(4-chlorophenyl)-1-cyclohexylprop-2-yn-1-yl]pyrrolidine (**14**) was synthesised using the standard procedure. Yellow oil (269 mg, average of 258-280 mg, 0.89mmol 89%).  $^1\text{H}$  NMR (600 MHz,  $\text{CDCl}_3$ )  $\delta$  7.38 – 7.32 (m, 2H), 7.28 – 7.23 (m, 2H), 3.34 (d,  $J$  = 8.4 Hz, 1H), 2.75 – 2.69 (m, 2H), 2.66 – 2.60 (m, 2H), 2.09 – 2.03 (m, 1H), 1.97 – 1.91 (m, 1H), 1.82 – 1.73 (m, 5H), 1.71 – 1.65 (m, 1H), 1.62 – 1.53 (m, 1H), 1.31 – 1.03 (m, 5H).  $^{13}\text{C}$  NMR (151 MHz,  $\text{CDCl}_3$ )  $\delta$  133.64, 132.93, 128.48, 122.08, 84.71, 61.25, 50.08, 41.23, 30.94, 30.66, 30.23, 26.65, 26.17 (d,  $J$  = 3.4 Hz), 23.50. (HRMS + pTOF-ES) calcd  $\text{C}_{19}\text{H}_{25}\text{N Cl}$  =  $[\text{M} + \text{H}]^+$ : 302.1691, observed: 302.1676.

#### 4-[3-(4-chlorophenyl)-1-cyclohexylprop-2-yn-1-yl]morpholine

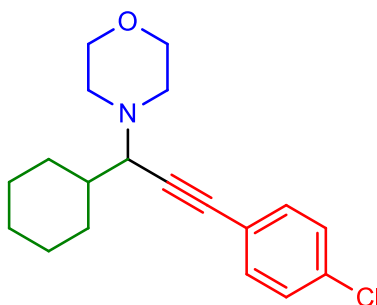

4-[3-(4-chlorophenyl)-1-cyclohexylprop-2-yn-1-yl]morpholine (**15**) was synthesised using the standard procedure. Yellow oil (214 mg, average of 199-229 mg, 0.67 mmol 67%).  $^1\text{H}$  NMR (600 MHz,  $\text{CDCl}_3$ )  $\delta$  7.39 – 7.33 (m, 2H), 7.28 (s, 1H), 3.79 – 3.69 (m, 3H), 3.12 (d,  $J$  = 9.9 Hz, 1H), 2.68 (ddd,  $J$  = 10.2, 5.8, 3.1 Hz, 2H), 2.49 (ddd,  $J$  = 11.3, 6.1, 3.2 Hz, 2H), 2.10 – 2.01 (m, 2H), 1.80 – 1.71 (m, 2H), 1.71 – 1.66 (m, 1H), 1.64 – 1.55 (m, 1H), 1.27 (tdd,  $J$  = 13.1, 6.8, 3.6 Hz, 1H), 1.20 (tq,  $J$  = 8.4, 5.7, 4.5 Hz, 2H), 0.99 (dq,  $J$  = 48.4, 12.2, 3.5 Hz, 2H).  $^{13}\text{C}$  NMR (151 MHz,  $\text{CDCl}_3$ )  $\delta$  133.78, 132.93, 128.52, 121.86, 87.74, 85.69, 67.19, 63.93, 38.99, 30.99, 30.32, 26.68, 26.13, 25.97. (HRMS + pTOF-ES) calcd  $\text{C}_{19}\text{H}_{25}\text{N O Cl}$  =  $[\text{M} + \text{H}]^+$ : 318.1628, observed: 318.1625.

#### 1-[3-(4-chlorophenyl)-1-cyclohexylprop-2-yn-1-yl] azepane

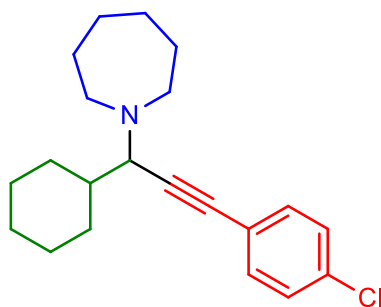

1-[3-(4-chlorophenyl)-1-cyclohexylprop-2-yn-1-yl] azepane (**16**) was synthesised using the standard procedure. Yellow oil (267 mg, average of 257-277 mg, 0.81 mmol 81%).  $^1\text{H}$  NMR (600 MHz,  $\text{CDCl}_3$ )  $\delta$  7.36 – 7.31 (m, 1H), 7.28 – 7.23 (m, 2H), 3.14 (d,  $J$  = 10.2 Hz, 0H), 2.77 (ddd,  $J$  = 12.4, 7.0, 3.6 Hz, 1H), 2.54 (ddd,  $J$  = 12.6, 7.5, 4.4 Hz, 1H), 2.15 (d,  $J$  = 13.6 Hz, 0H), 2.08 – 2.02 (m, 1H), 1.75 (td,  $J$  = 10.3, 9.8, 3.2 Hz, 1H), 1.69 – 1.67 (m, 1H), 1.67 – 1.61 (m, 2H), 1.61 (s, 0H), 1.58 (s, 3H), 1.54 – 1.41 (m, 1H), 1.33 – 1.27 (m, 1H), 1.25 (s, 2H), 1.21 (dt,  $J$  = 12.0, 3.0 Hz, 1H), 1.18 – 1.12 (m, 1H), 1.02 – 0.86 (m, 2H), 0.84 (s, 1H).  $^{13}\text{C}$  NMR (151 MHz,  $\text{CDCl}_3$ )  $\delta$  133.64, 132.93, 128.48, 122.08, 84.71, 61.25, 50.08, 41.23, 30.94, 30.66, 30.23, 26.65, 26.17 (d,  $J$  = 3.4 Hz), 23.50. (HRMS + pTOF-ES) calcd  $\text{C}_{21}\text{H}_{29}\text{NCl}$  =  $[\text{M} + \text{H}]^+$ : 330.1975, observed: 330.1989.

#### 1-[1-cyclohexyl-3-(4-ethylphenyl)prop-2-yn-1-yl]pyrrolidine

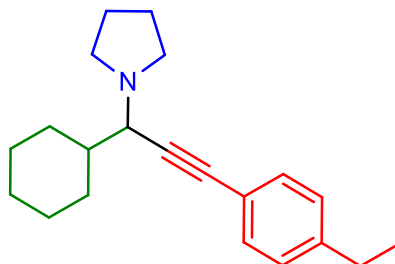

1-[1-cyclohexyl-3-(4-ethylphenyl)prop-2-yn-1-yl]pyrrolidine (**17**) was synthesised using the standard procedure. Yellow oil (252 mg, average of 232-272 mg, 0.85 mmol 85%).  $^1\text{H}$  NMR (600 MHz,  $\text{CDCl}_3$ )  $\delta$  7.38 – 7.34 (m, 2H), 7.13 (d,  $J$  = 7.9 Hz, 2H), 3.34 (d,  $J$  = 8.4 Hz, 1H), 2.74 (s, 2H), 2.64 (q,  $J$  = 7.6 Hz, 4H), 2.09 (d,  $J$  = 12.9 Hz, 1H), 1.95 (dd,  $J$  = 13.5, 3.5 Hz, 1H), 1.80 (s, 2H), 1.79 – 1.74 (m, 5H), 1.68 (d,  $J$  = 11.7 Hz, 2H), 1.28 (q,  $J$  = 4.4, 3.3 Hz, 1H), 1.27 – 1.20 (m, 6H), 1.20 – 1.15 (m, 1H), 1.10 (dtd,  $J$  = 19.1, 12.5, 11.9, 3.4 Hz, 2H).  $^{13}\text{C}$  NMR (151 MHz,  $\text{CDCl}_3$ )  $\delta$  159.15, 133.02, 115.83, 113.78, 86.17, 85.48, 61.29, 55.26, 50.05, 41.37, 30.70, 30.23, 26.68, 26.22, 26.19, 23.52. (HRMS + pTOF-ES) calcd  $\text{C}_{21}\text{H}_{30}\text{N}$  =  $[\text{M} + \text{H}]^+$ : 296.2395, observed: 296.2378.

#### 4-[1-[1-cyclohexyl-3-(4-phenylprop-2-yn-1-yl)piperidin-4-yl]morpholine

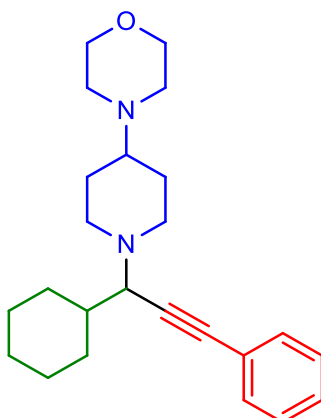

1-[1-cyclohexyl-3-(4-phenylprop-2-yn-1-yl)](piperidin-4-yl)morpholine (**18**) was synthesised using the standard procedure. Red oil (287 mg, average of 278 -296 mg, 0.78 mmol 78%).  $^1\text{H}$  NMR (600 MHz,  $\text{CDCl}_3$ )  $\delta$  7.45 – 7.40 (m, 2H), 7.32 – 7.24 (m, 3H), 3.72 (t,  $J = 4.7$  Hz, 4H), 3.14 (d,  $J = 10.0$  Hz, 1H), 2.87 – 2.80 (m, 1H), 2.73 (dp,  $J = 11.3, 2.9$  Hz, 1H), 2.58 – 2.51 (m, 5H), 2.24 – 2.14 (m, 2H), 2.13 – 2.07 (m, 1H), 2.04 – 1.97 (m, 1H), 1.84 (dq,  $J = 13.2, 3.4$  Hz, 2H), 1.79 – 1.70 (m, 2H), 1.70 – 1.64 (m, 1H), 1.57 (qdd,  $J = 11.8, 7.0, 3.8$  Hz, 2H), 1.47 (qd,  $J = 12.0, 4.0$  Hz, 1H), 1.32 – 1.21 (m, 1H), 1.24 – 1.11 (m, 2H), 1.01 (qd,  $J = 12.6, 3.5$  Hz, 1H), 0.90 (qd,  $J = 12.2, 3.5$  Hz, 1H).  $^{13}\text{C}$  NMR (151 MHz,  $\text{CDCl}_3$ )  $\delta$  131.69, 128.20, 127.71, 123.60, 87.26, 86.27, 67.34, 63.54, 62.36, 52.82, 49.83, 45.51, 39.79, 31.28, 30.33, 28.67, 28.23, 26.76, 26.21, 26.05. (HRMS + pTOF-ES) calcd  $\text{C}_{24}\text{H}_{35}\text{N}_2\text{O}$  =  $[\text{M} + \text{H}]^+$ : 367.2753, observed: 367.2749.

#### 1-[1-cyclohexyl-3-(4-ethylphenyl)prop-2-yn-1-yl] morpholine

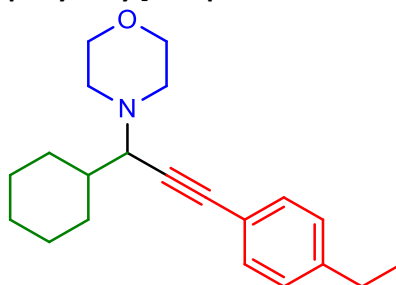

1-[1-cyclohexyl-3-(4-ethylphenyl)prop-2-yn-1-yl] morpholine (**19**) was synthesised using the standard procedure. Dark red oil (211 mg, average of 192 -230 mg, 0.68 mmol 68%).  $^1\text{H}$  NMR (600 MHz,  $\text{CDCl}_3$ )  $\delta$  7.38 – 7.34 (m, 2H), 7.13 (d,  $J = 7.9$  Hz, 2H), 3.75 (tdd,  $J = 18.0, 8.9, 5.6$  Hz, 4H), 3.12 (d,  $J = 9.8$  Hz, 1H), 2.70 (ddd,  $J = 11.7, 6.1, 2.9$  Hz, 2H), 2.64 (q,  $J = 7.6$  Hz, 2H), 2.51 (ddd,  $J = 11.4, 6.1, 3.1$  Hz, 2H), 2.14 – 2.08 (m, 1H), 2.07 – 2.01 (m, 1H), 1.77 (tdd,  $J = 11.5, 5.6, 3.1$  Hz, 2H), 1.71 – 1.66 (m, 1H), 1.60 (dtd,  $J = 14.3, 11.0, 3.4$  Hz, 1H), 1.33 – 1.15 (m, 5H), 1.01 (dq,  $J = 48.5, 12.3, 3.5$  Hz, 2H).  $^{13}\text{C}$  NMR (151 MHz,  $\text{CDCl}_3$ )  $\delta$  144.19, 131.67, 127.77, 120.57, 86.83, 85.81, 67.22, 63.96, 39.11, 31.52, 30.97, 30.37, 28.78, 26.73, 26.18, 26.03, 25.95, 25.01, 15.46. (HRMS + pTOF-ES) calcd  $\text{C}_{21}\text{H}_{30}\text{NO}$  =  $[\text{M} + \text{H}]^+$ : 312.2328, observed: 312.2327.

### 1-[1-cyclohexyl-3-(4-ethylphenyl)prop-2-yn-1-yl] azepane

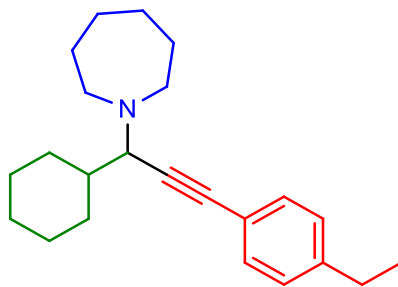

1-[1-cyclohexyl-3-(4-ethylphenyl)prop-2-yn-1-yl] azepane. morpholine (**20**) was synthesised using the standard procedure. Dark red oil (234 mg, average of 223 -245 mg, 0.72 mmol 72%).  $^1\text{H}$  NMR (600 MHz,  $\text{CDCl}_3$ )  $\delta$  7.34 (d,  $J = 7.8$  Hz, 2H), 7.12 (d,  $J = 7.8$  Hz, 2H), 3.15 (d,  $J = 10.1$  Hz, 1H), 2.78 (td,  $J = 8.3, 7.3, 4.4$  Hz, 2H), 2.66 – 2.52 (m, 5H), 2.15 (d,  $J = 13.4$  Hz, 1H), 1.75 (ddd,  $J = 12.5, 8.3, 4.1$  Hz, 3H), 1.69 – 1.57 (m, 7H), 1.54 – 1.44 (m, 2H), 1.32 – 1.11 (m, 8H), 1.02 – 0.83 (m, 3H).  $^{13}\text{C}$  NMR (151 MHz,  $\text{CDCl}_3$ )  $\delta$  143.89, 131.64, 127.72, 121.04, 88.01, 84.94, 65.20, 52.62, 50.87, 45.45, 40.80, 31.13, 30.94, 30.66, 29.19, 28.77, 27.13, 26.82, 26.26, 26.08, 15.50. (HRMS + pTOF-ES) calcd  $\text{C}_{23}\text{H}_{34}\text{N} = [\text{M} + \text{H}]^+$ : 324.2699, observed: 324.2691.

### 1-[1-cyclohexyl-3-(4-methoxyphenyl)prop-2-yn-1-yl] azepane

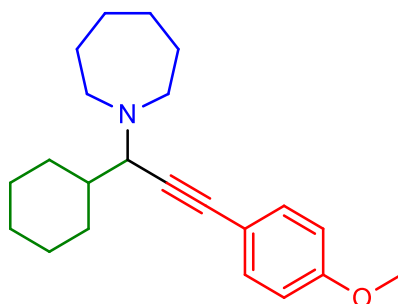

1-[1-cyclohexyl-3-(4-methoxyphenyl)prop-2-yn-1-yl] azepane (**21**) was synthesised using the standard procedure. Yellow oil (271 mg, average of 255 -288 mg, 0.83 mmol 83%).  $^1\text{H}$  NMR (600 MHz,  $\text{CDCl}_3$ )  $\delta$  7.35 (d,  $J = 8.7$  Hz, 2H), 6.81 (d,  $J = 8.7$  Hz, 3H), 3.80 (s, 4H), 3.13 (d,  $J = 10.2$  Hz, 2H), 2.77 (s, 2H), 2.57 – 2.52 (m, 3H), 2.18 (s, 1H), 1.74 (s, 2H), 1.66 (s, 2H), 1.58 (s, 6H), 1.25 (s, 2H), 1.18 (d,  $J = 10.9$  Hz, 3H).  $^{13}\text{C}$  NMR (151 MHz,  $\text{CDCl}_3$ )  $\delta$  159.01, 133.00, 116.11, 113.76, 87.24, 84.53, 65.22, 55.27, 53.42, 52.63, 40.83, 31.59, 31.17, 30.66, 29.29, 27.13, 26.84, 26.28, 26.09, 22.66, 14.12. (HRMS + pTOF-ES) calcd  $\text{C}_{22}\text{H}_{32}\text{NO} = [\text{M} + \text{H}]^+$ : 326.2489, observed: 326.2484.

**tert-butyl N-[1-(1-cyclohexyl-3-phenylprop-2-yn-1-yl) piperidin-4-yl]carbamate**

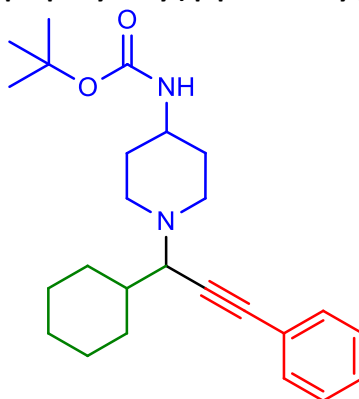

tert-butyl N-[1-(1-cyclohexyl-3-phenylprop-2-yn-1-yl) piperidin-4-yl]carbamate (**22**) was synthesised using the standard procedure.  $^1\text{H}$  NMR (600 MHz,  $\text{CDCl}_3$ )  $\delta$  7.44 – 7.39 (m, 2H), 7.33 – 7.26 (m, 3H), 4.44 (s, 1H), 3.48 (s, 1H), 3.13 (d,  $J$  = 10.0 Hz, 1H), 2.76 (dd,  $J$  = 9.8, 5.8 Hz, 1H), 2.63 (d,  $J$  = 6.6 Hz, 2H), 2.31 (t,  $J$  = 11.4 Hz, 1H), 2.10 (d,  $J$  = 13.2 Hz, 1H), 1.99 (d,  $J$  = 13.5 Hz, 1H), 1.94 (s, 1H), 1.75 (t,  $J$  = 14.0 Hz, 2H), 1.68 (s, 1H), 1.56 (d,  $J$  = 4.4 Hz, 3H), 1.45 (s, 8H), 1.40 – 1.33 (m, 1H), 1.31 – 1.14 (m, 5H), 1.06 – 0.97 (m, 1H), 0.91 (q,  $J$  = 12.3, 11.9 Hz, 1H).  $^{13}\text{C}$  NMR (151 MHz,  $\text{CDCl}_3$ )  $\delta$  131.67, 128.21, 127.75, 123.47, 87.00, 86.43, 79.16, 63.69, 51.42, 48.05, 45.58, 39.69, 33.02, 32.70, 31.23, 30.37, 29.70, 28.42, 26.72, 26.18, 26.03. (HRMS + pTOF-ES) calcd  $\text{C}_{25}\text{H}_{37}\text{N}_2\text{O}_2$  =  $[\text{M} + \text{H}]^+$ : 397.2868, observed: 397.2855

**1-(1-cyclohexyl-3-phenylprop-2-yn-1-yl)-N,N-dimethylpiperidin-4-amine**

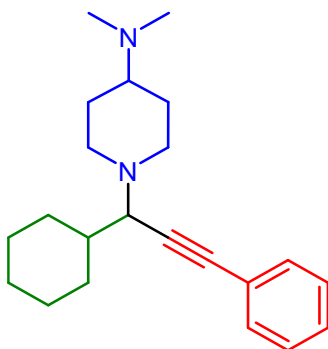

1-(1-cyclohexyl-3-phenylprop-2-yn-1-yl)-N,N-dimethylpiperidin-4-amine (**23**) was synthesised using the standard procedure  $^1\text{H}$  NMR (600 MHz,  $\text{CDCl}_3$ )  $\delta$  7.46 – 7.39 (m, 1H), 7.32 – 7.24 (m, 2H), 3.14 (d,  $J$  = 9.9 Hz, 1H), 2.86 – 2.79 (m, 1H), 2.75 – 2.69 (m, 1H), 2.54 (td,  $J$  = 11.7, 2.4 Hz, 1H), 2.27 (s, 4H), 2.20 (td,  $J$  = 11.8, 2.3 Hz, 1H), 2.12 (tq,  $J$  = 12.3, 4.1 Hz, 2H), 2.05 – 1.98 (m, 1H), 1.85 – 1.78 (m, 2H), 1.81 – 1.73 (m, 1H), 1.76 – 1.70 (m, 1H), 1.70 – 1.64 (m, 1H), 1.63 – 1.55 (m, 1H), 1.57 – 1.50 (m, 1H), 1.45 (qd,  $J$  = 12.2, 4.0 Hz, 1H), 1.27 (tdd,  $J$  = 16.4, 9.8, 3.5 Hz, 1H), 1.24 – 1.12 (m, 1H), 1.06 – 0.96 (m, 1H), 0.96 – 0.87 (m, 1H).  $^{13}\text{C}$  NMR (151 MHz,  $\text{CDCl}_3$ )  $\delta$  131.69, 128.18, 127.68, 123.64, 87.34, 86.25, 63.59, 62.52, 52.97, 45.57, 41.69, 39.80, 31.28, 30.38, 28.75, 28.41, 26.77, 26.23, 26.07. (HRMS + pTOF-ES) calcd  $\text{C}_{22}\text{H}_{33}\text{N}_2$  =  $[\text{M} + \text{H}]^+$ : 325.2644, observed: 325.2644

tert-butyl N-[1-(6-chloro-1-cyclohexylhex-2-yn-1-yl) piperidin-4-yl]carbamate

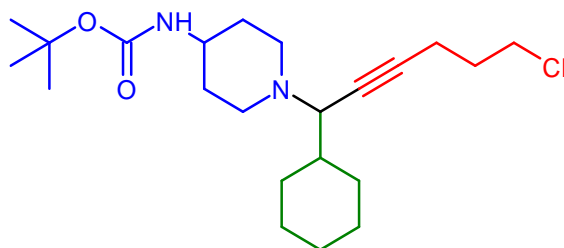

tert-butyl N-[1-(6-chloro-1-cyclohexylhex-2-yn-1-yl) piperidin-4-yl]carbamate (**24**) was synthesised under microwave irradiation in a gram scale (Method A); Scheme 3 however, using our protocol, **24** can be synthesized up to 500 mg scale (Method B).

$^1\text{H}$  NMR (600 MHz, Chloroform-*d*)  $\delta$  4.43 (d,  $J$  = 8.0 Hz, 1H), 3.66 (t,  $J$  = 6.4 Hz, 2H), 3.44 (s, 1H), 2.87 (dt,  $J$  = 10.0, 2.2 Hz, 1H), 2.69 – 2.63 (m, 1H), 2.53 (dd,  $J$  = 12.1, 4.2 Hz, 1H), 2.47 (dt,  $J$  = 12.7, 6.4 Hz, 1H), 2.41 (td,  $J$  = 6.8, 2.1 Hz, 2H), 2.15 (t,  $J$  = 11.4 Hz, 1H), 2.00 – 1.88 (m, 6H), 1.76 – 1.67 (m, 2H), 1.67 – 1.62 (m, 1H), 1.44 (s, 9H), 1.43 – 1.29 (m, 2H), 1.23 (qt,  $J$  = 12.1, 3.4 Hz, 1H), 1.19 – 1.08 (m, 2H), 0.88 (dq,  $J$  = 45.9, 12.3, 3.5 Hz, 2H).  $^{13}\text{C}$  NMR (151 MHz, Chloroform-*d*)  $\delta$  155.2, 84.0, 79.2, 78.0, 63.2, 45.5, 43.8, 39.7, 33.0, 32.7, 31.8, 31.1, 30.3, 28.4, 26.7, 26.2, 26.0, 16.1. (HRMS + pTOF-ES) calcd  $\text{C}_{22}\text{H}_{37}\text{ClN}_2\text{O}_2$  [M+H] = 397.2622. Calculated mass [M+H] = 397.2627 (ppm = 5.8).

## References

- 1 S. J. Coles and P. A. Gale, *Chem. Sci.*, 2012, **3**, 683–689.
- 2 G. M. Sheldrick, *Acta Crystallogr. Sect. C Struct. Chem.*, 2015, **71**, 3–8.
- 3 L. J. Bourhis, O. V. Dolomanov, R. J. Gildea, J. A. K. Howard and H. Puschmann, *Acta Crystallogr. Sect. A Found. Crystallogr.*, 2015, **71**, 59–75.
- 4 S. Stoll and A. Schweiger, *J. Magn. Reson.*, 2006, **178**, 42–55.

**NMR Data**

**<sup>1</sup>H NMR for 1-(1-cyclohexyl-3-phenylprop-2-yn-1-yl) pyrrolidine (1)**

PROTON\_01

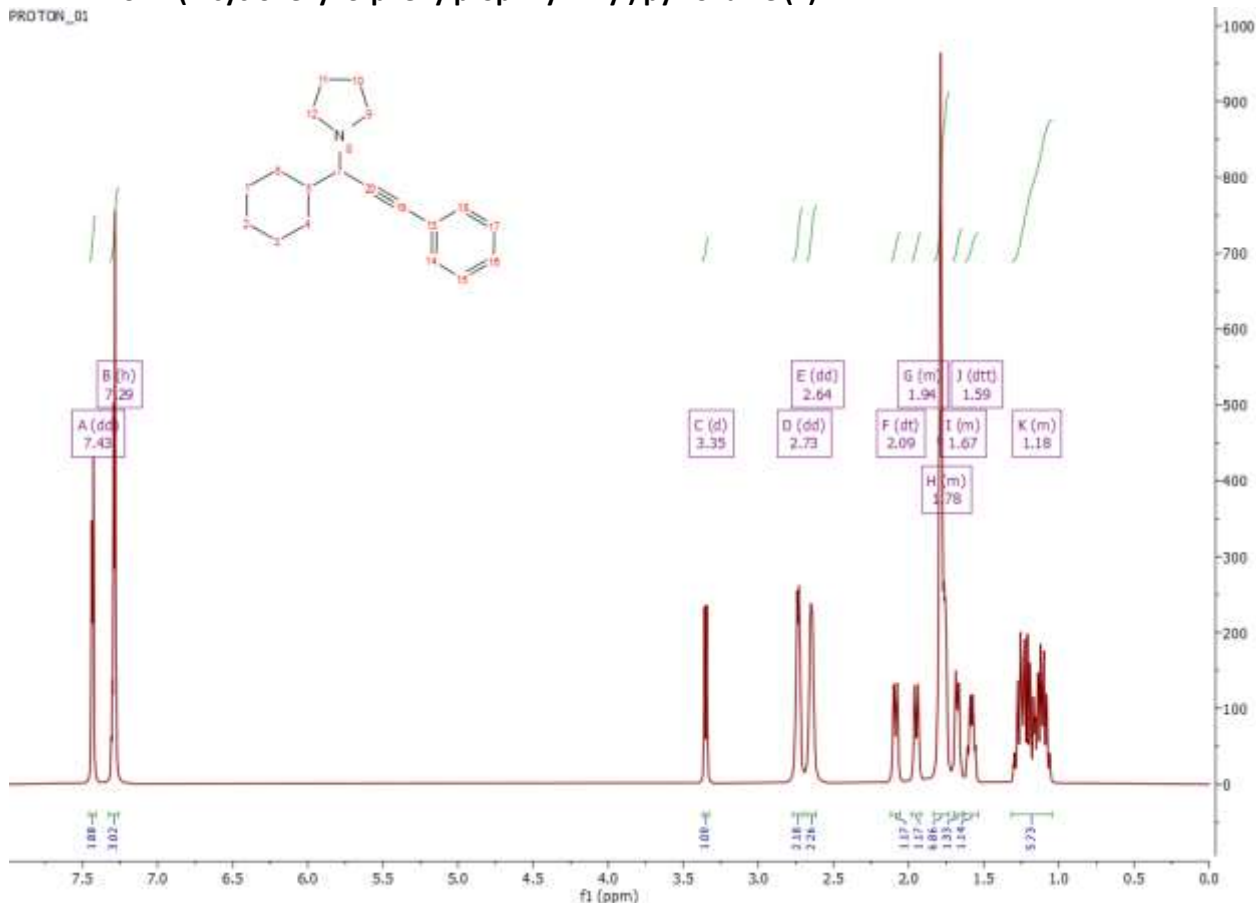

**<sup>1</sup>H NMR for 1-(1-cyclohexyl-3-phenylprop-2-yn-1-yl)piperidine (2)**

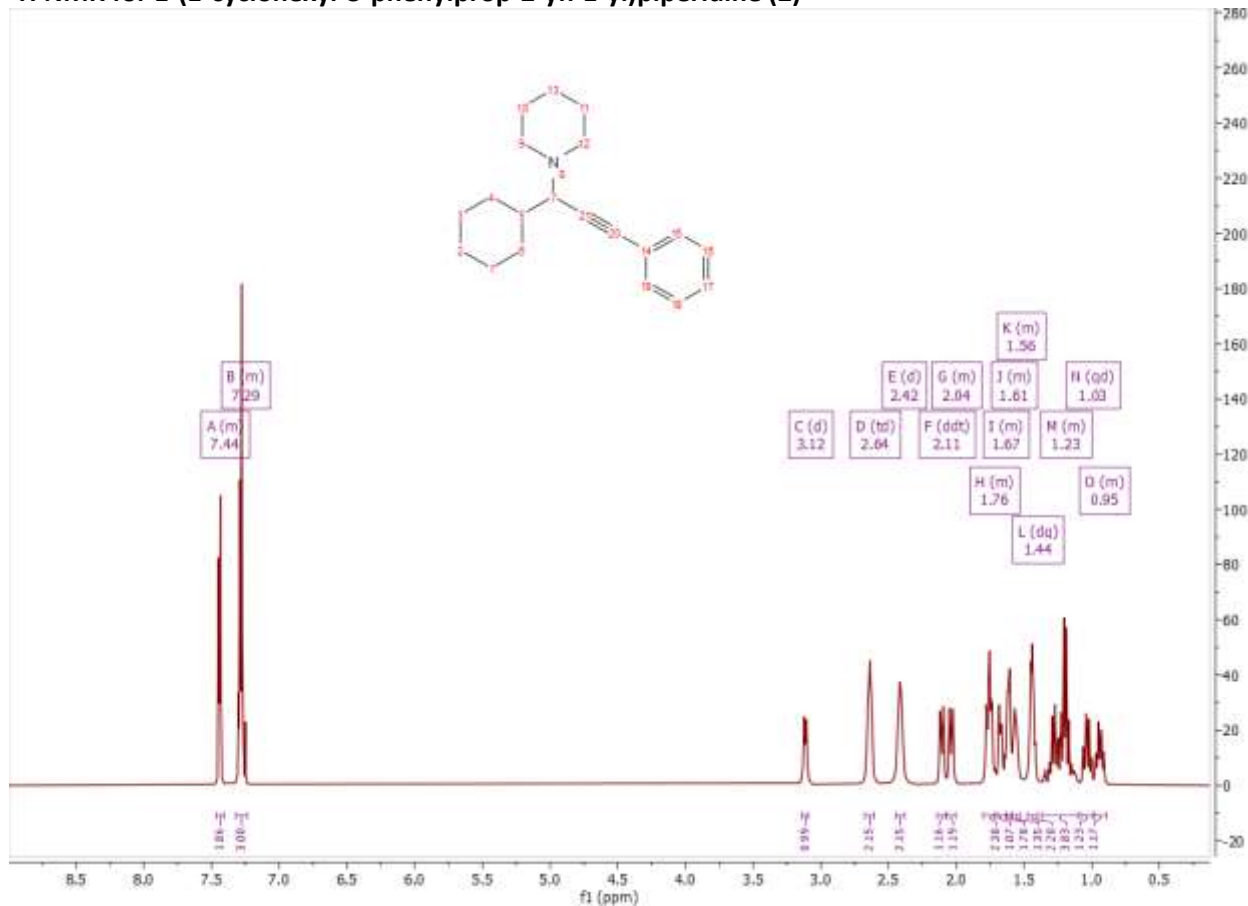



### <sup>1</sup>H NMR for 4-(1-cyclohexyl-3-phenylprop-2-yn-1-yl)morpholine (3)

PROTON\_01

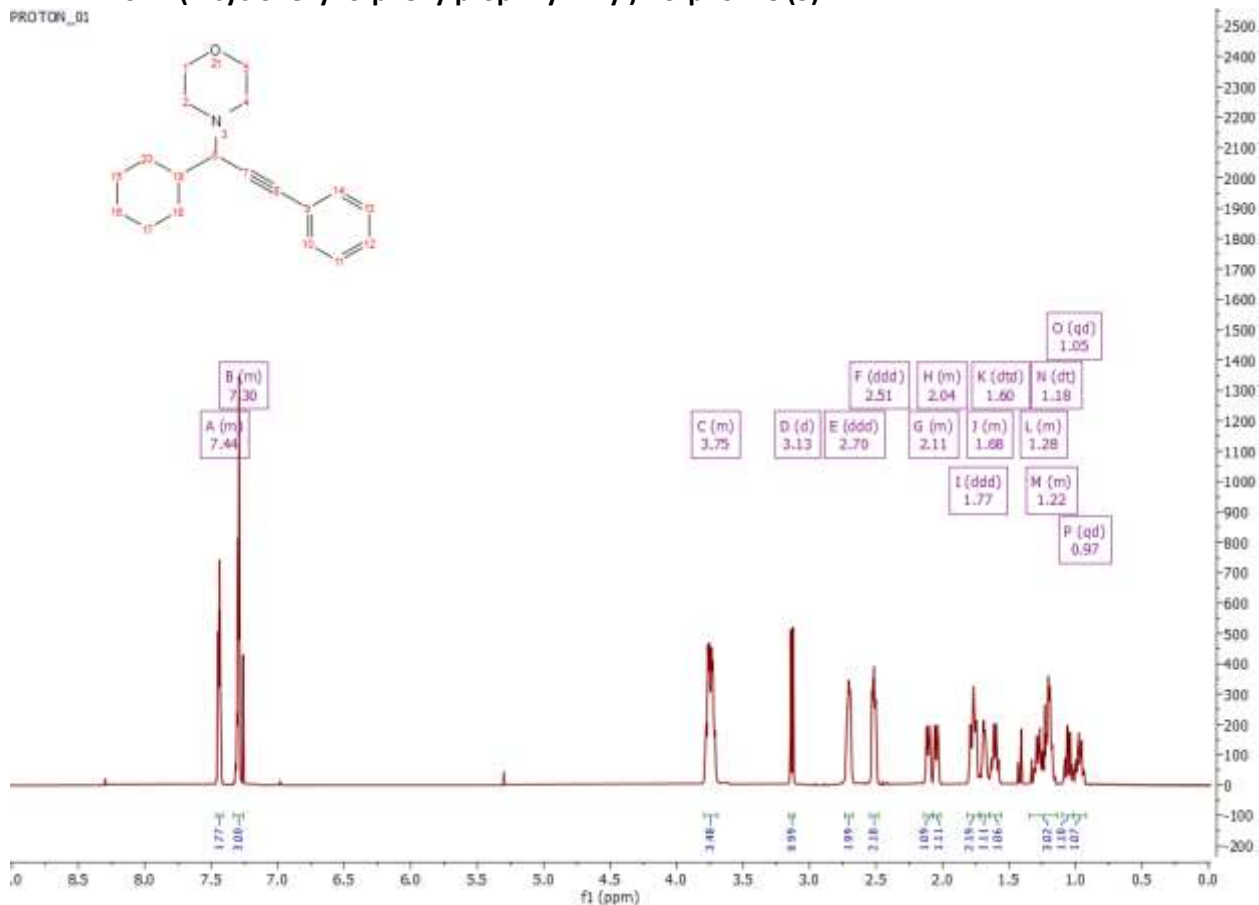

### <sup>1</sup>H NMR for 1-(1-cyclohexyl-3-phenylprop-2-yn-1-yl)azepane (4)

PROTON\_01

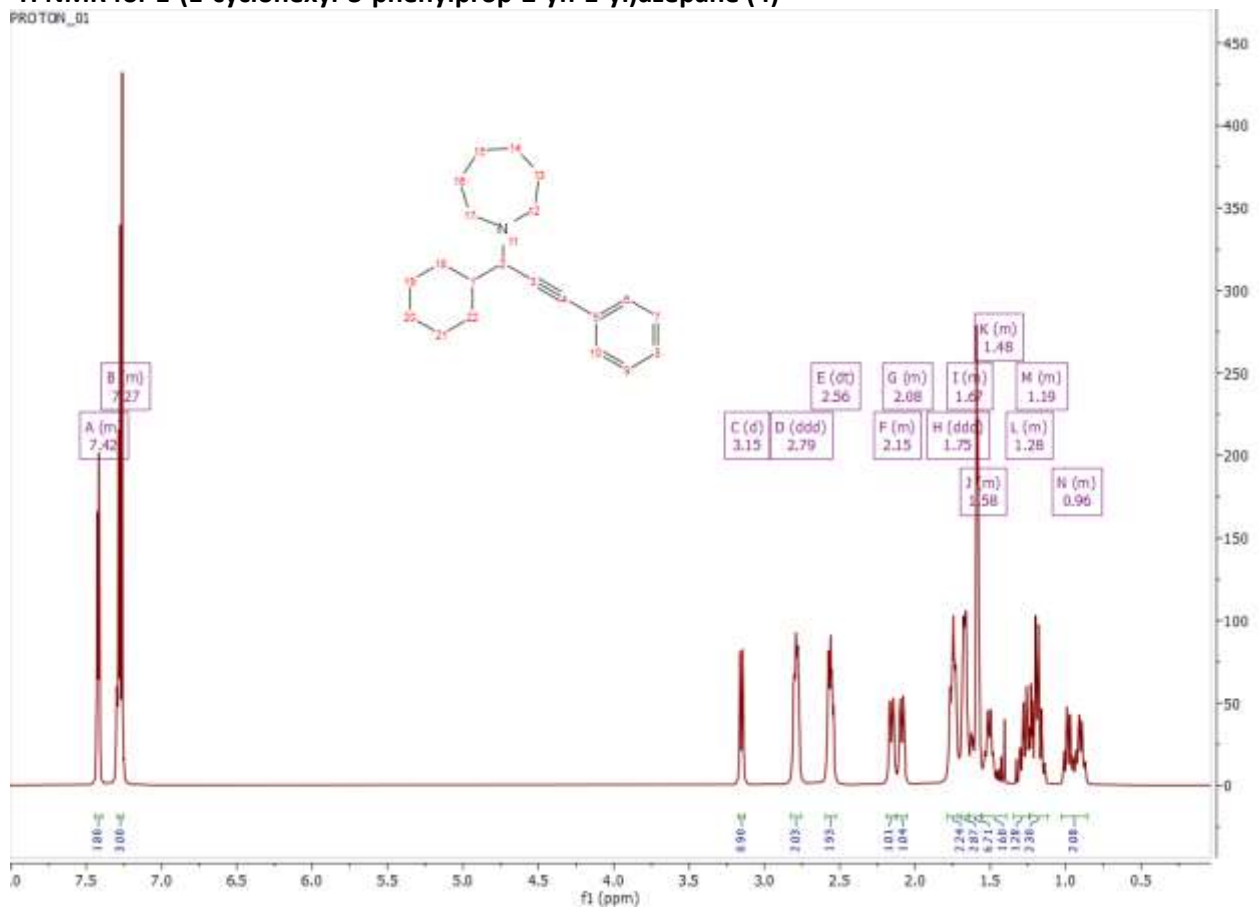

**<sup>1</sup>H NMR for 1-(1-phenyloct-1-yn-3-yl) pyrrolidine (5)**

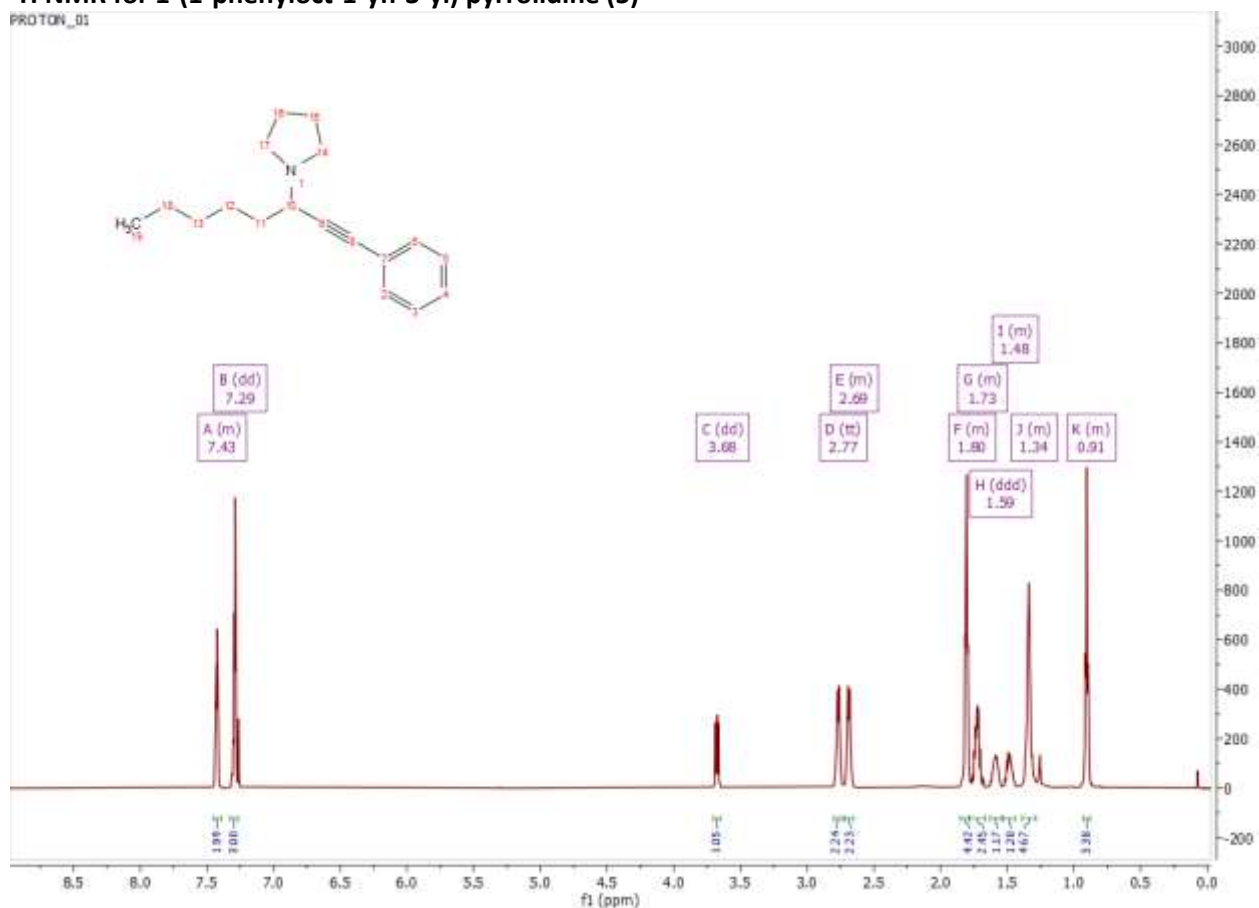

**<sup>1</sup>H NMR for 1-(1-phenyloct-1-yn-3-yl)azepane (6)**

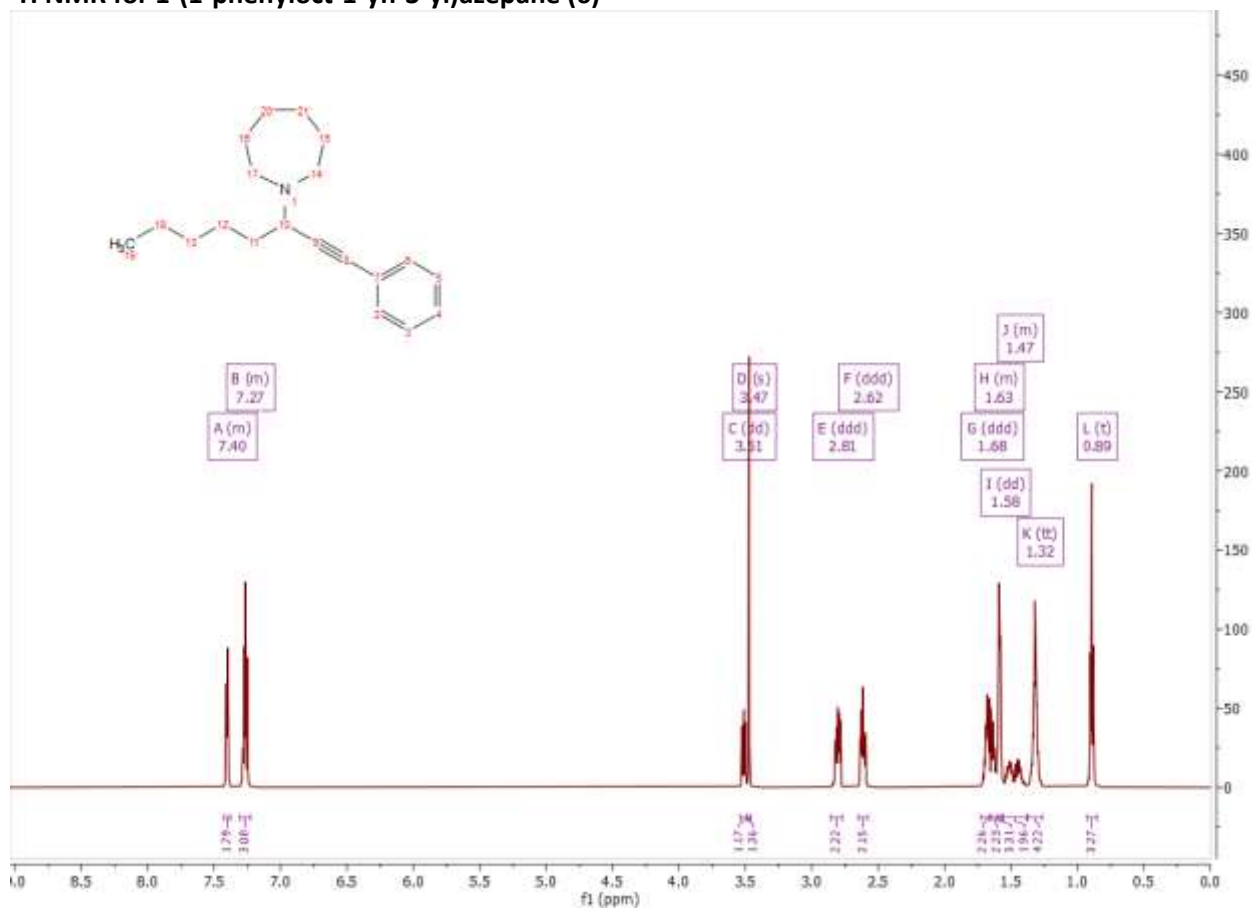

### <sup>1</sup>H NMR for 4-(1-phenyloct-1-yn-3-yl)morpholine (7)

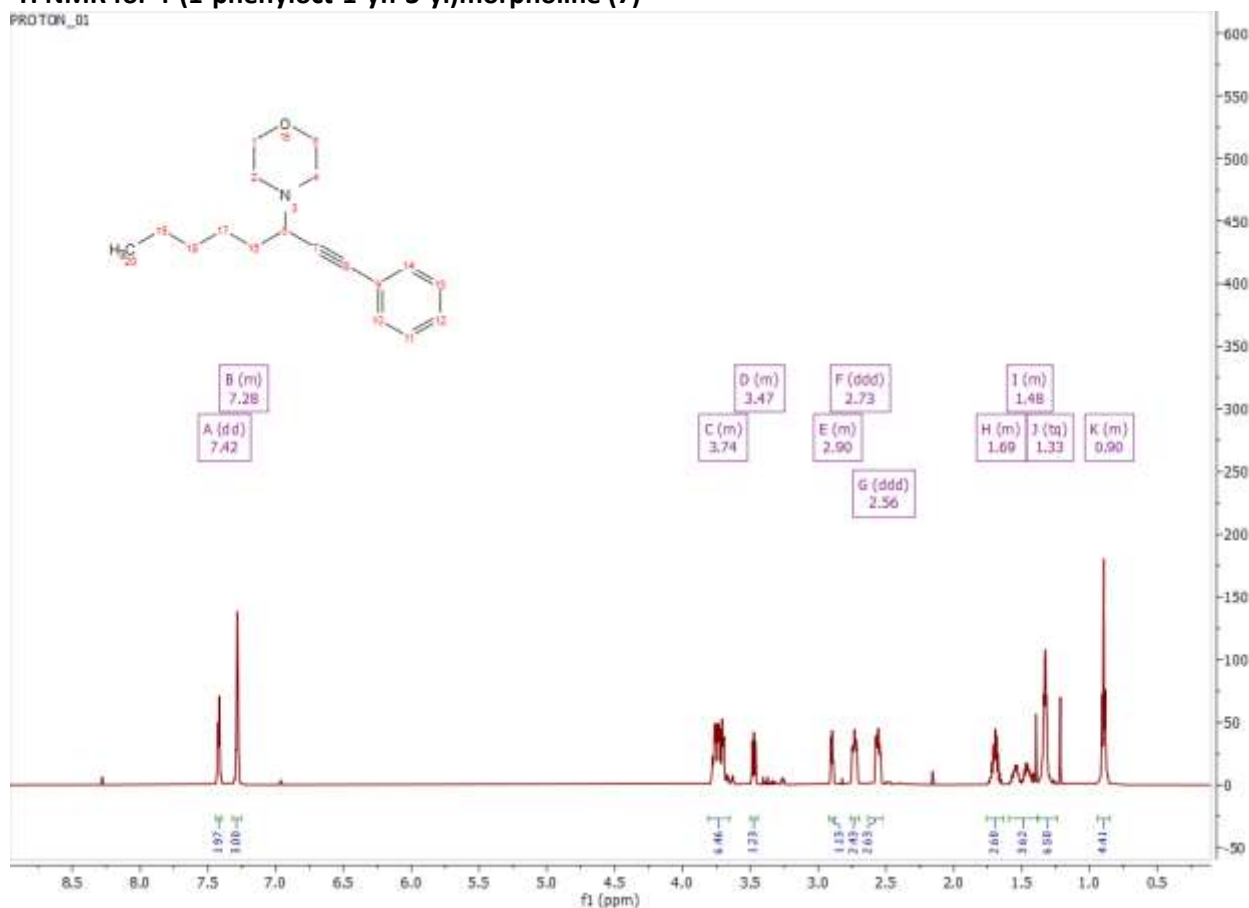

### <sup>1</sup>H NMR for N,N-diallyl-1-phenyloct-1-yn-3-amine (8)

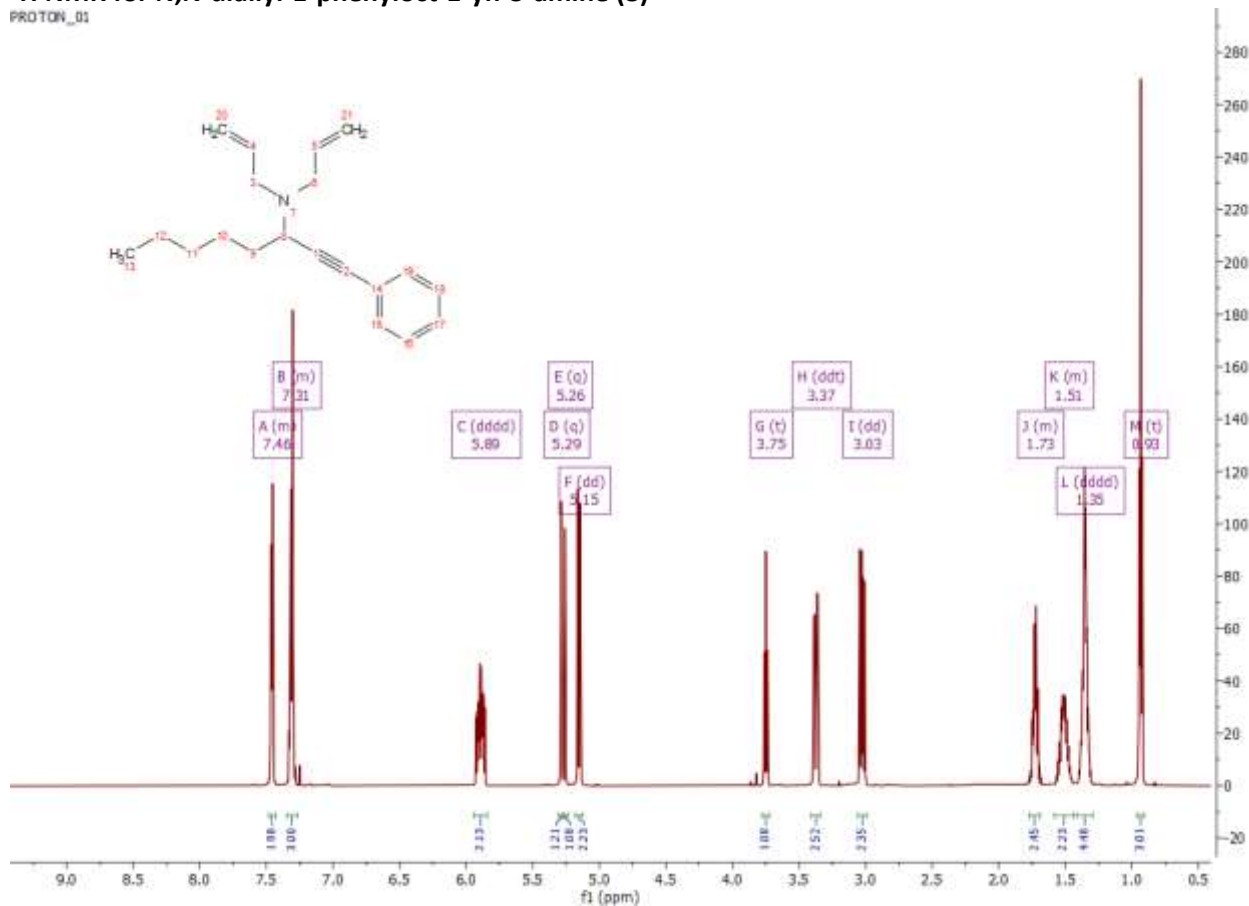

# <sup>1</sup>H NMR for 4-(1-cyclohexyl-3-(4-methoxyphenyl)prop-2-yn-1-yl)morpholine (9)

PROTON\_01

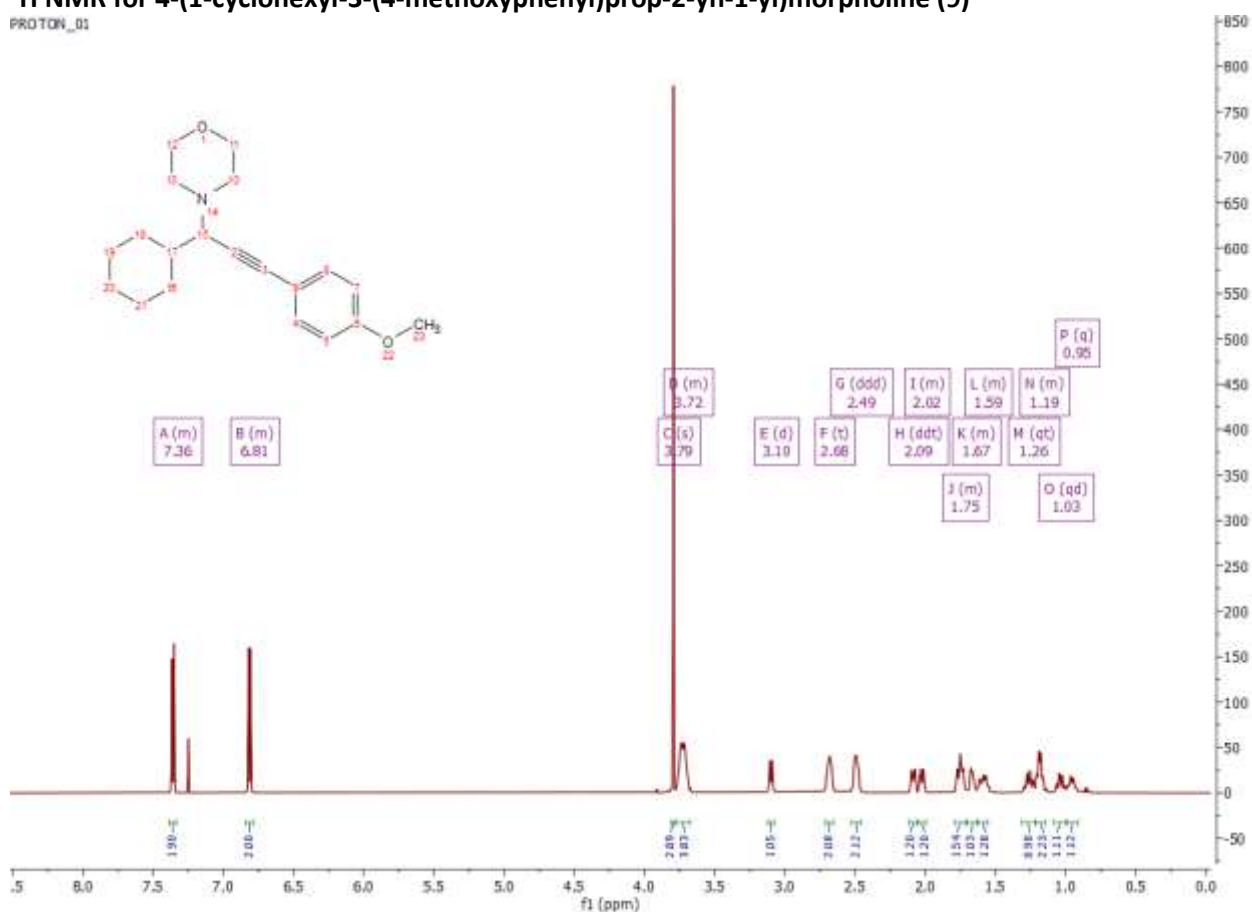

# <sup>1</sup>H NMR for 1-(1-(4-methoxyphenyl)oct-1-yn-3-yl)pyrrolidine (10)

PROTON\_01

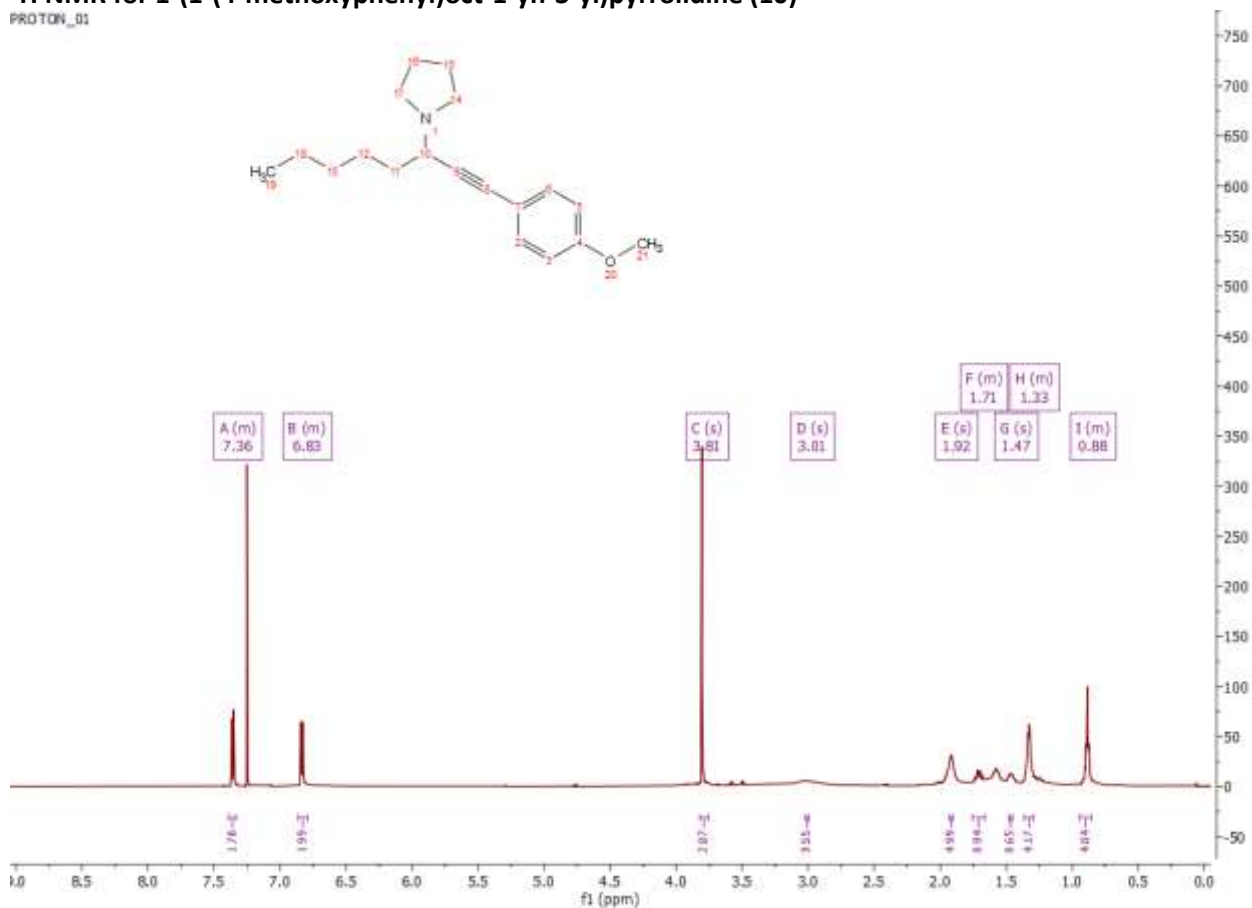

### <sup>1</sup>H NMR for 4-(1-(4-methoxyphenyl)oct-1-yn-3-yl)morpholine (11)

PROTON\_01

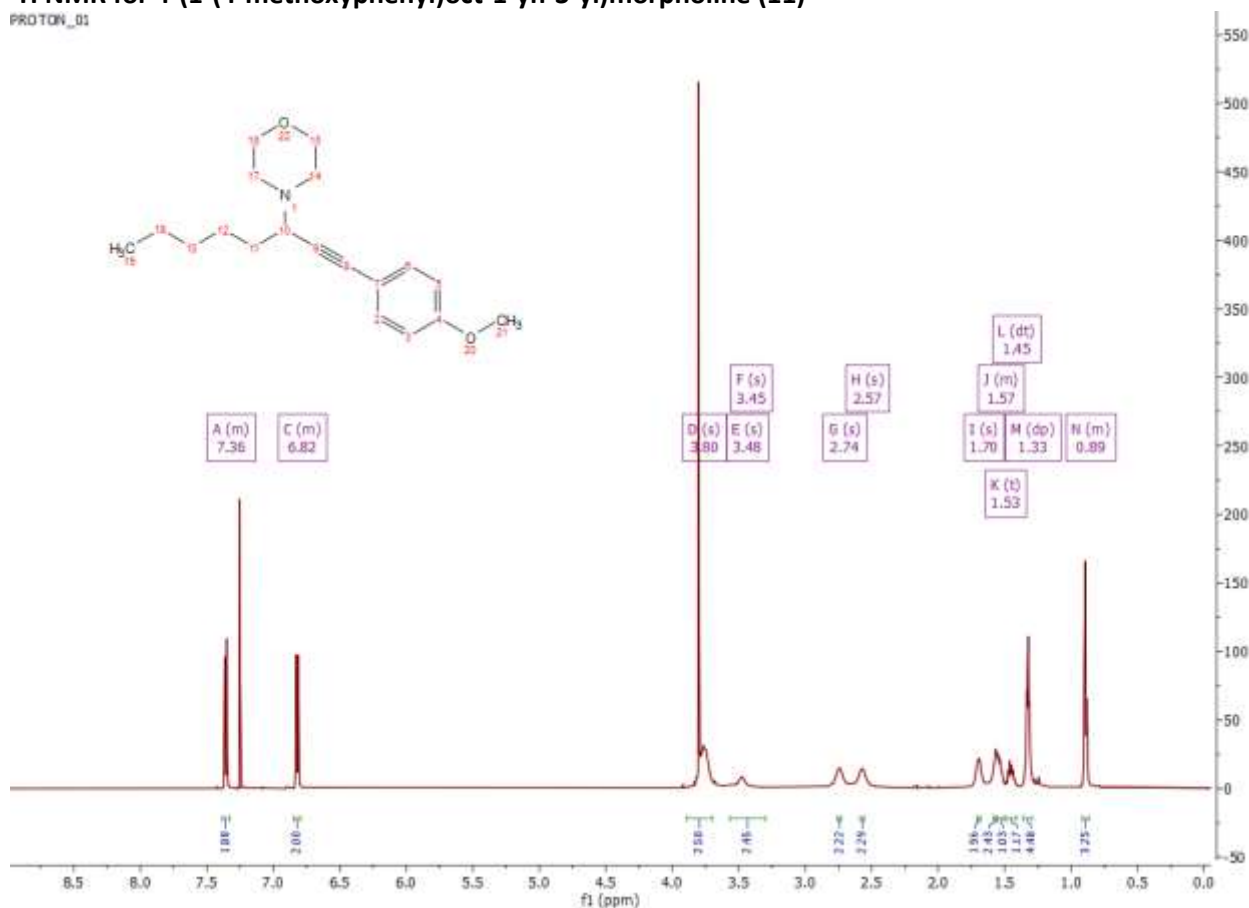

### <sup>1</sup>H NMR for 1-(1-cyclohexyl-3-phenylprop-2-yn-1-yl)indoline (12)

PROTON\_01

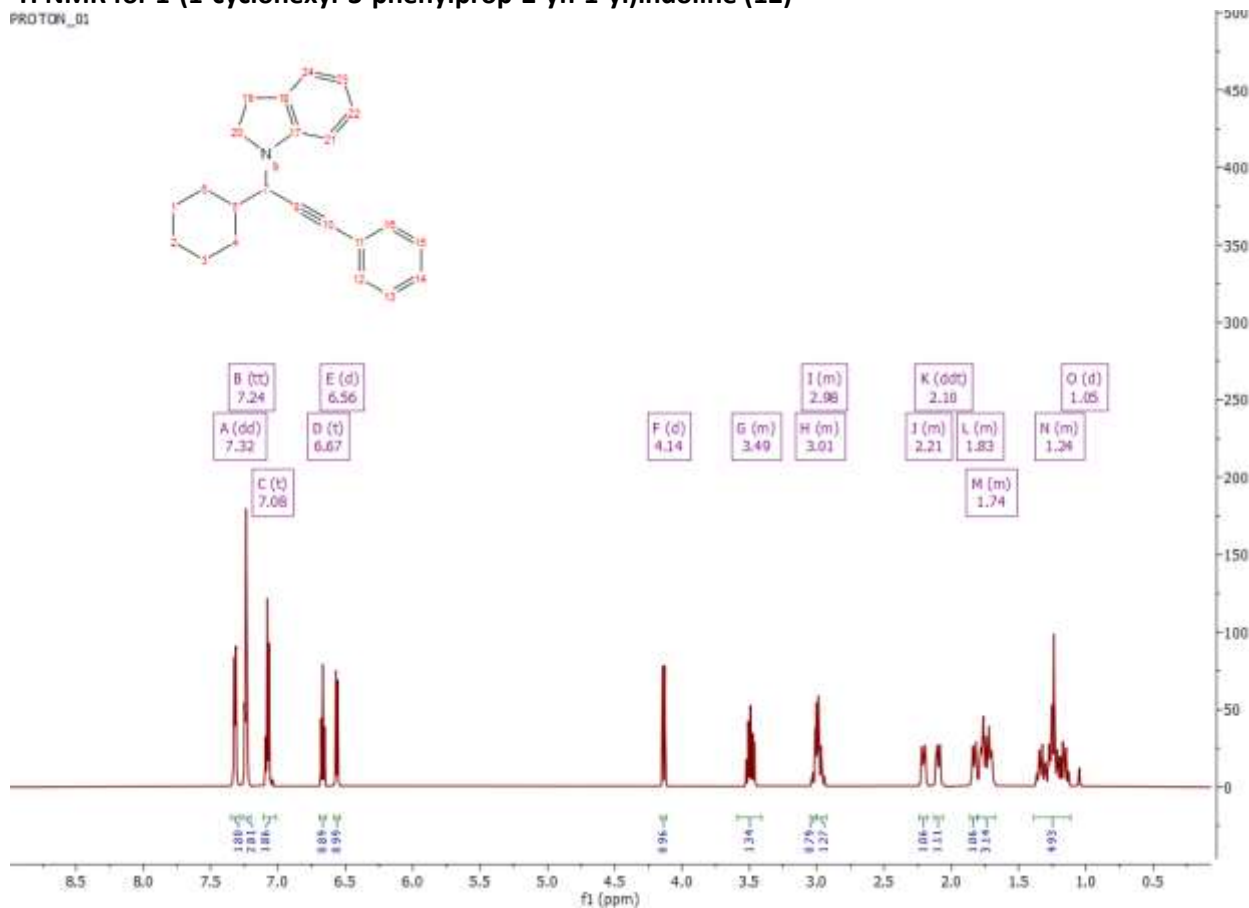

<sup>1</sup>H NMR for 1-[1-cyclohexyl-3-(4-methoxyphenyl)prop-2-yn-1-yl]pyrrolidine (13)

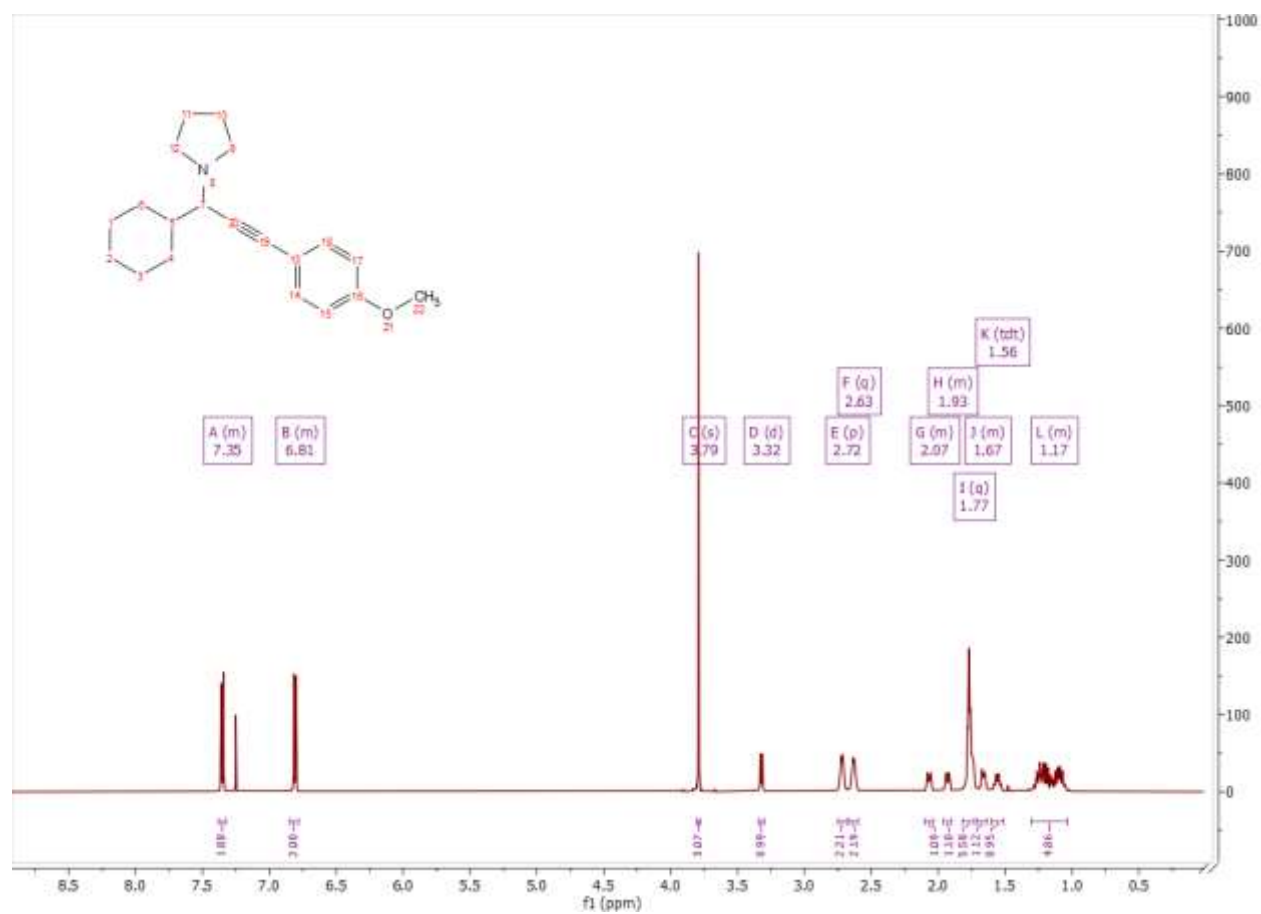



# <sup>1</sup>H NMR and <sup>13</sup>C NMR for 4-[3-(4-chlorophenyl)-1-cyclohexylprop-2-yn-1-yl]morpholine (15)

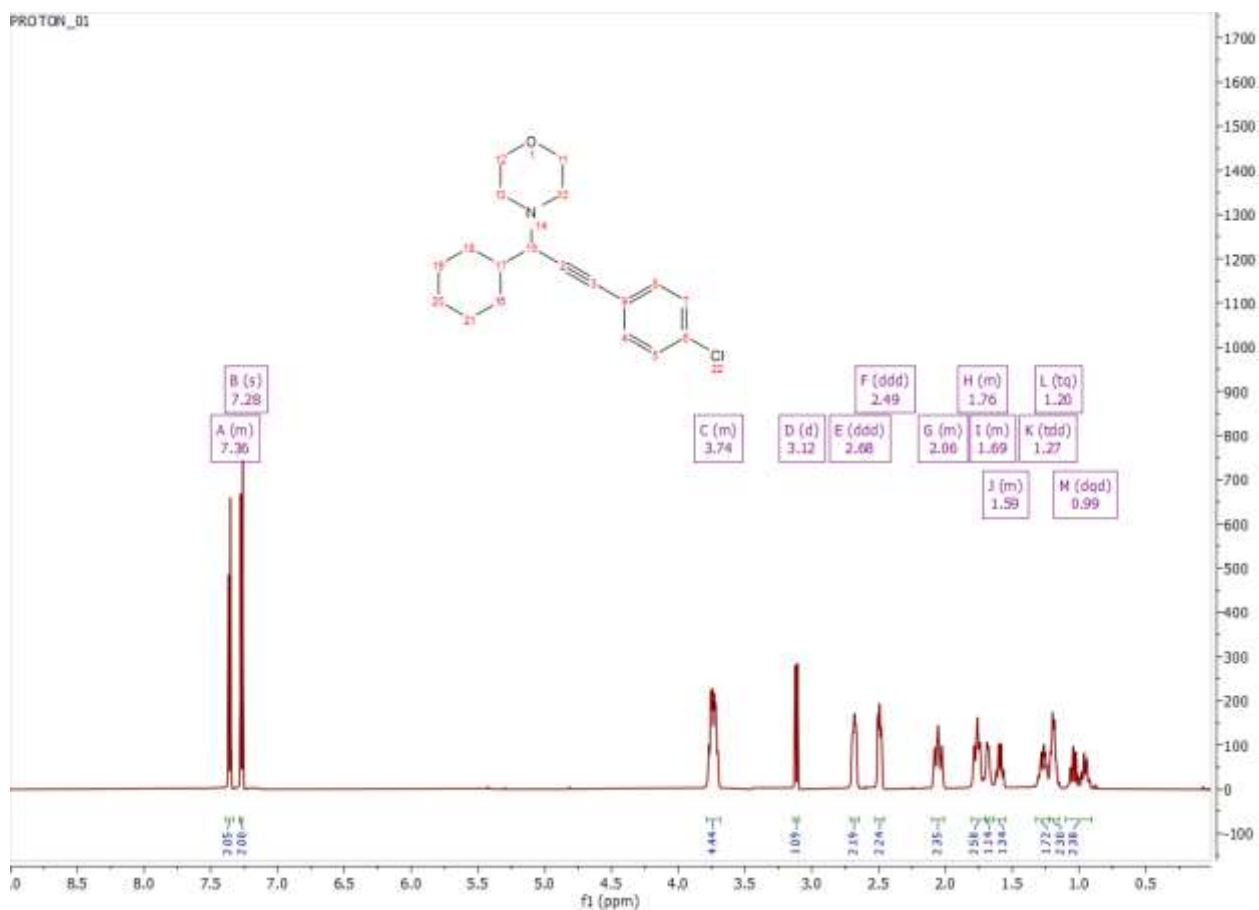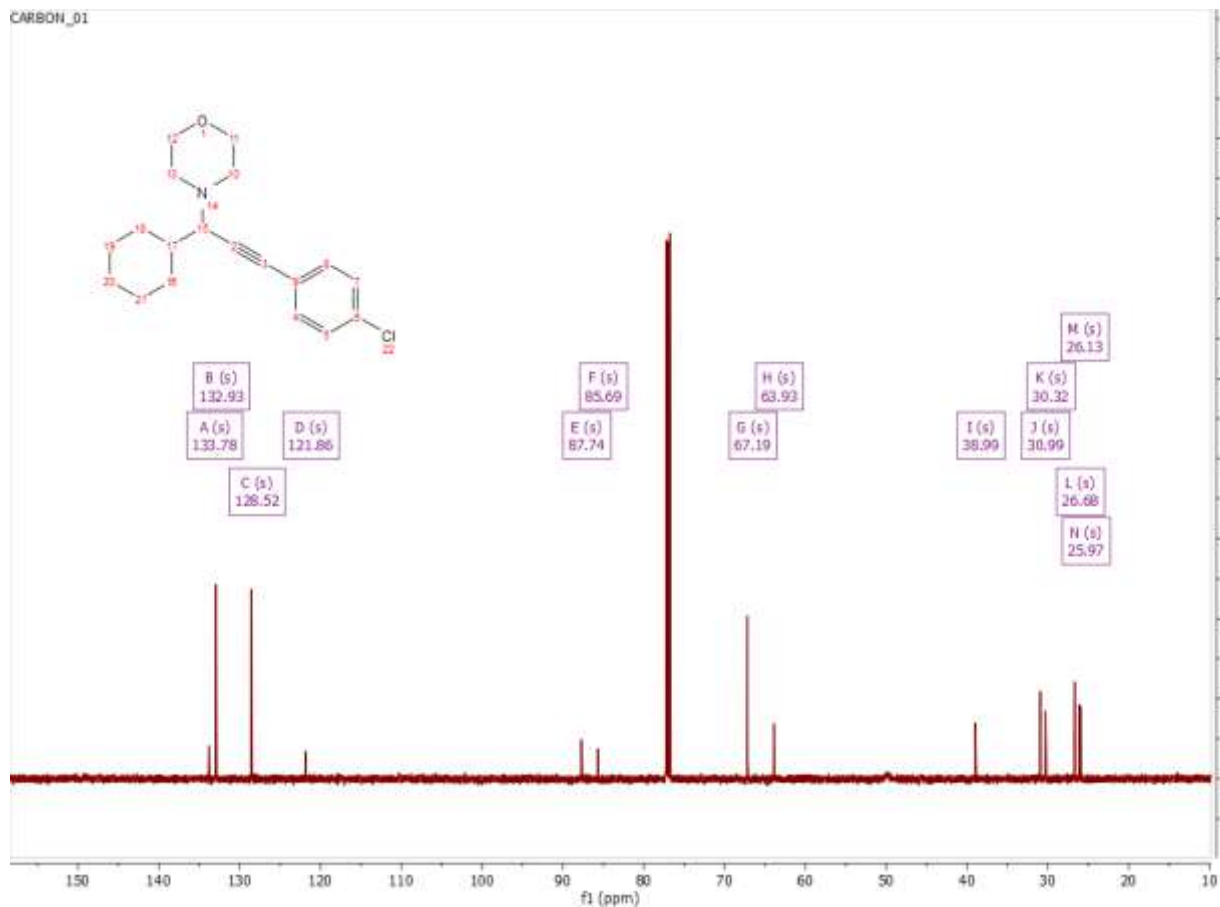



<sup>1</sup>H NMR and <sup>13</sup>C NMR for 1-[3-(4-chlorophenyl)-1-cyclohexylprop-2-yn-1-yl] azepane (16)

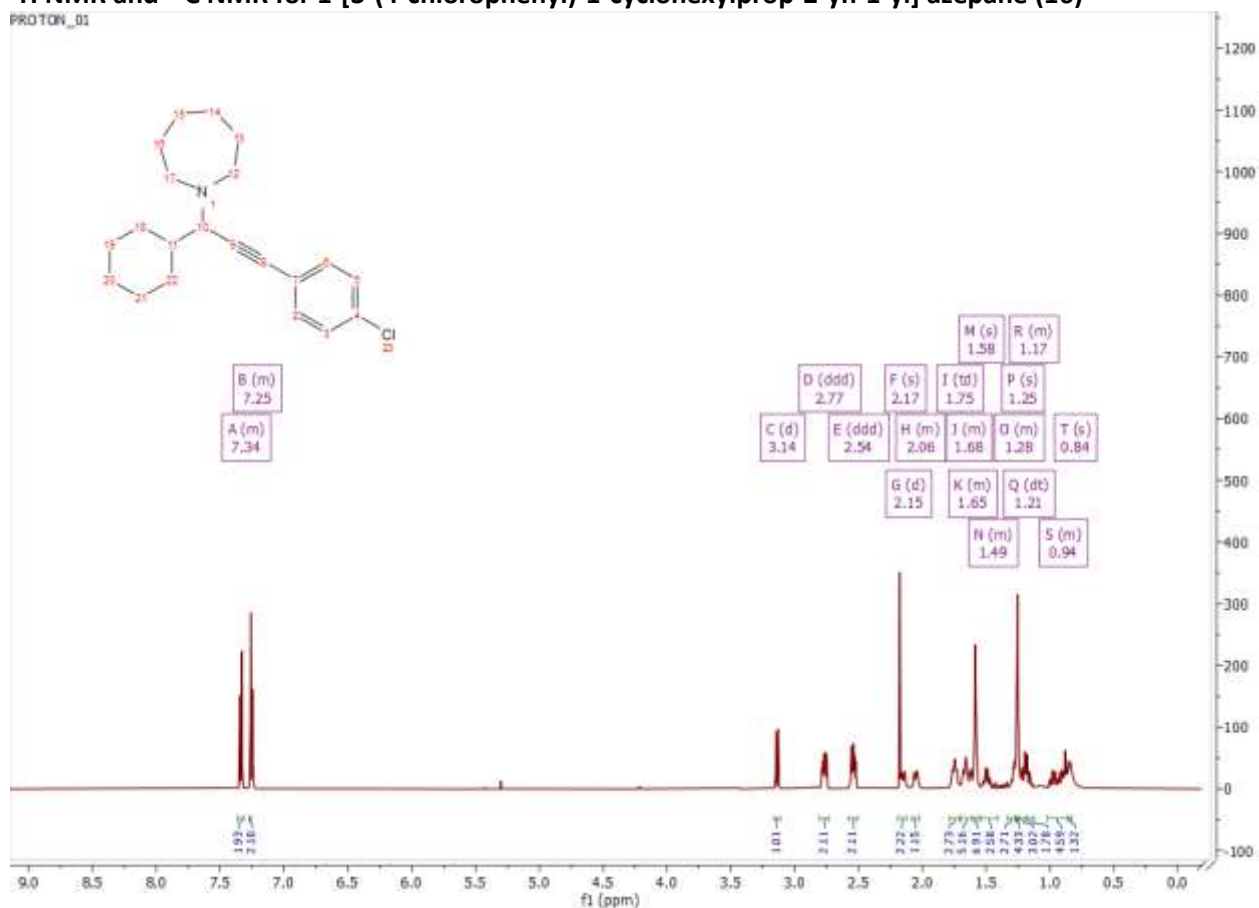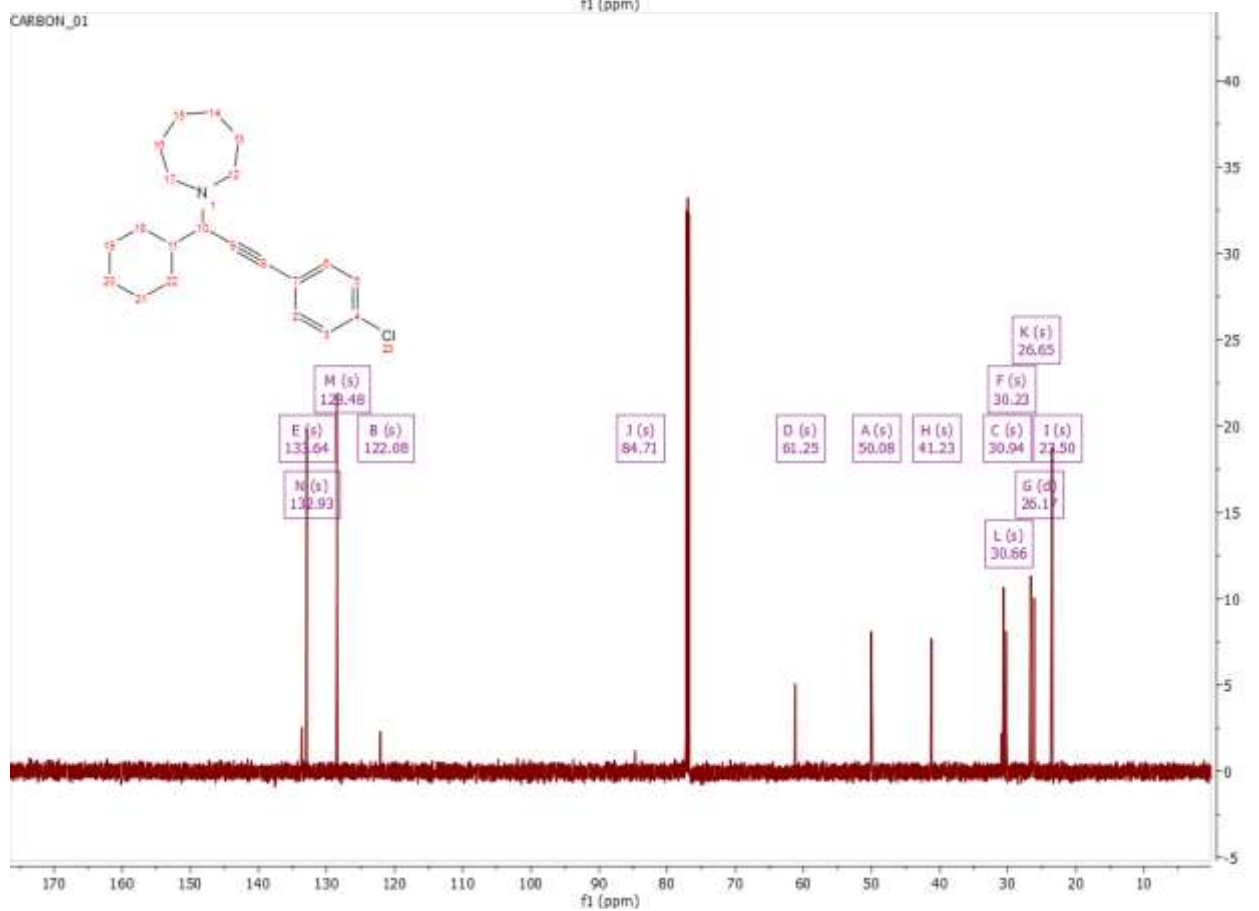

<sup>1</sup>H NMR and <sup>13</sup>C NMR for 1-[1-cyclohexyl-3-(4-ethylphenyl)prop-2-yn-1-yl]pyrrolidine (17)

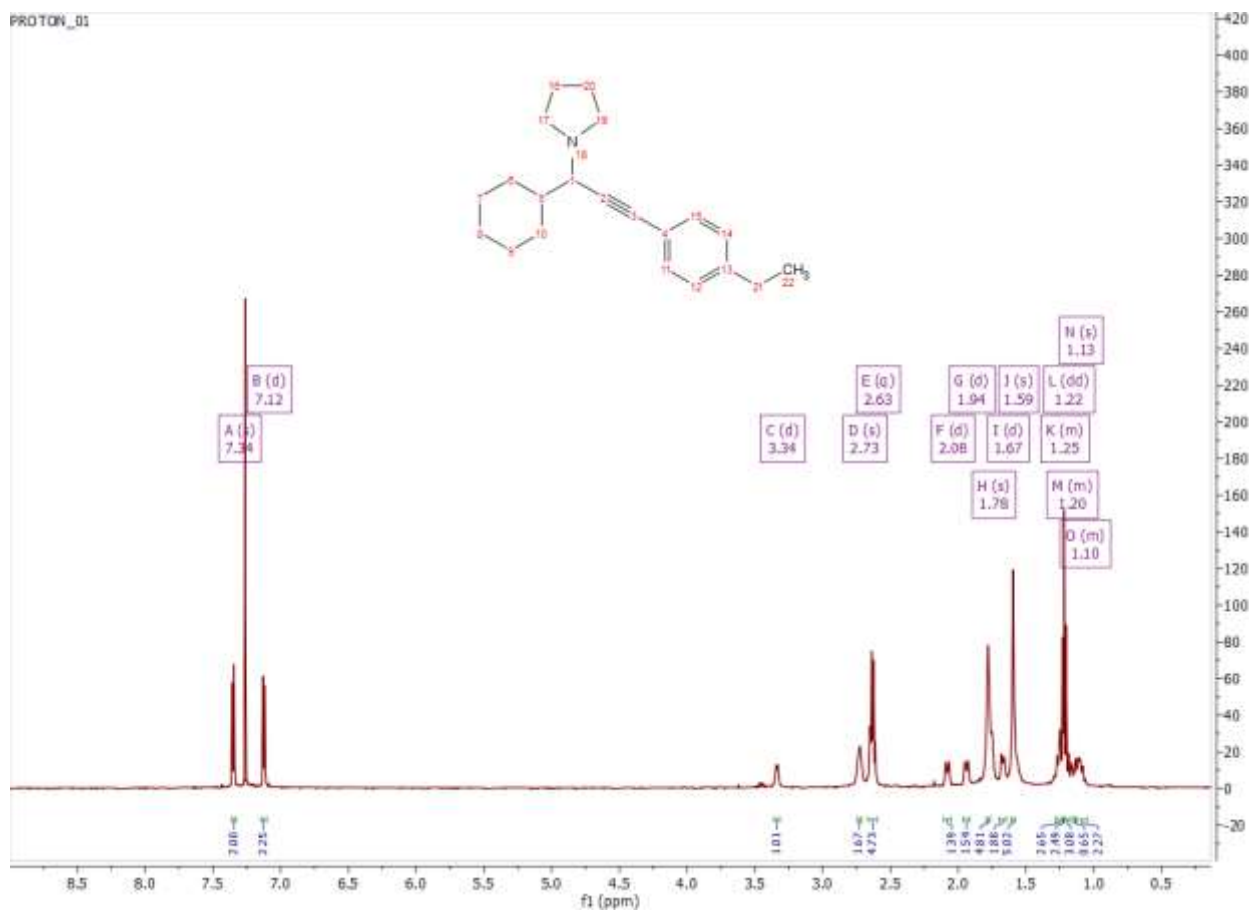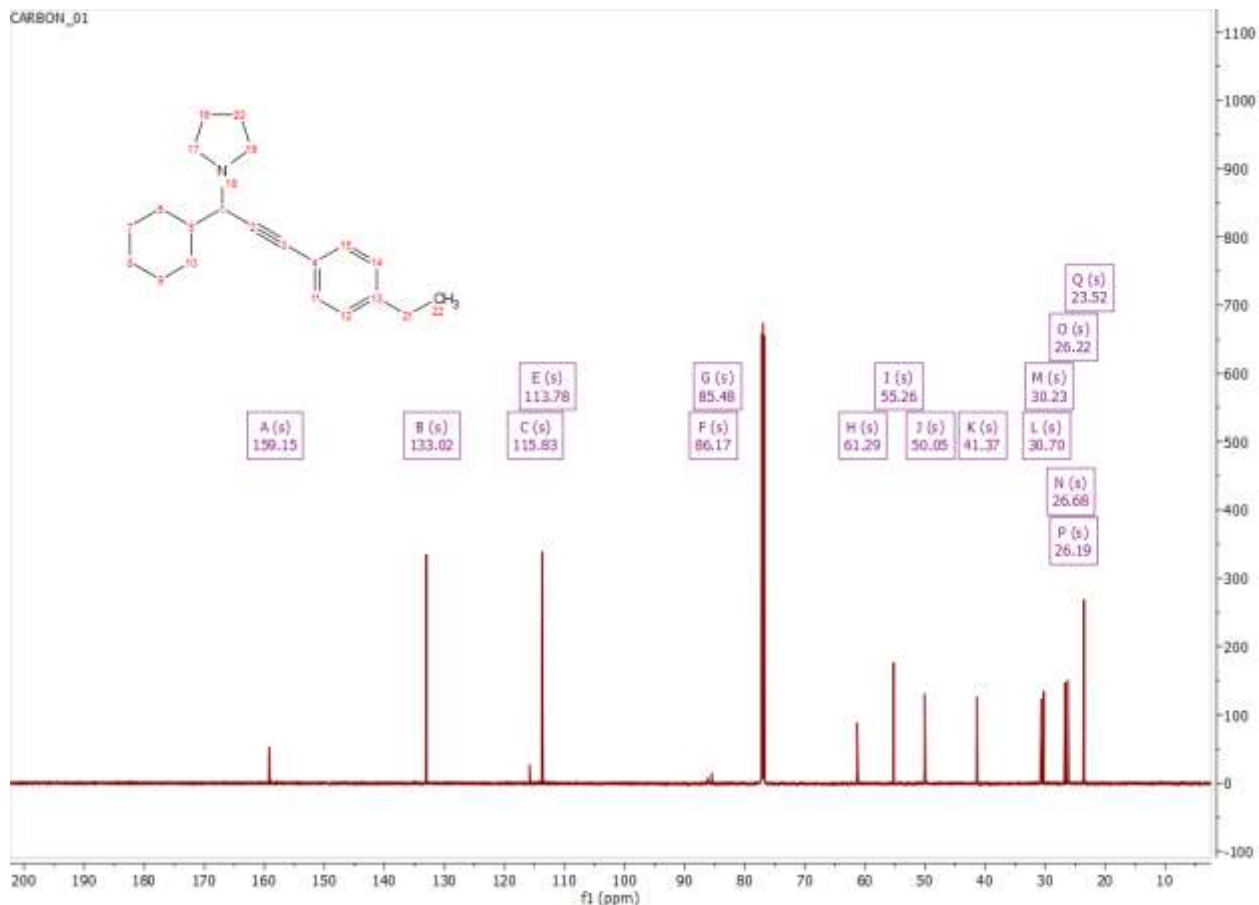

<sup>1</sup>H NMR and <sup>13</sup>C NMR for 4-{1-[1-cyclohexyl-3-(4-phenylprop-2-yn-1-yl)piperidin-4-yl]morpholine (18)

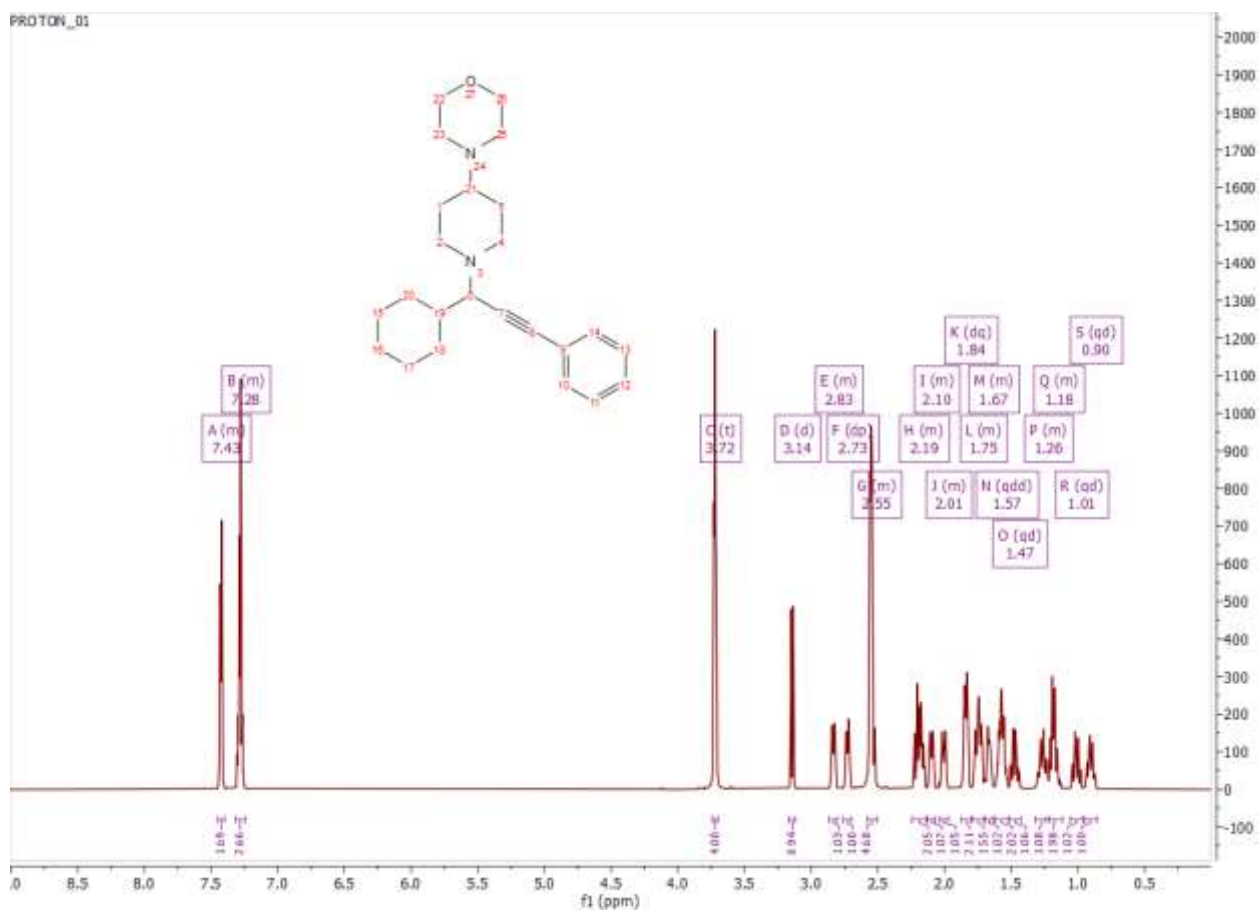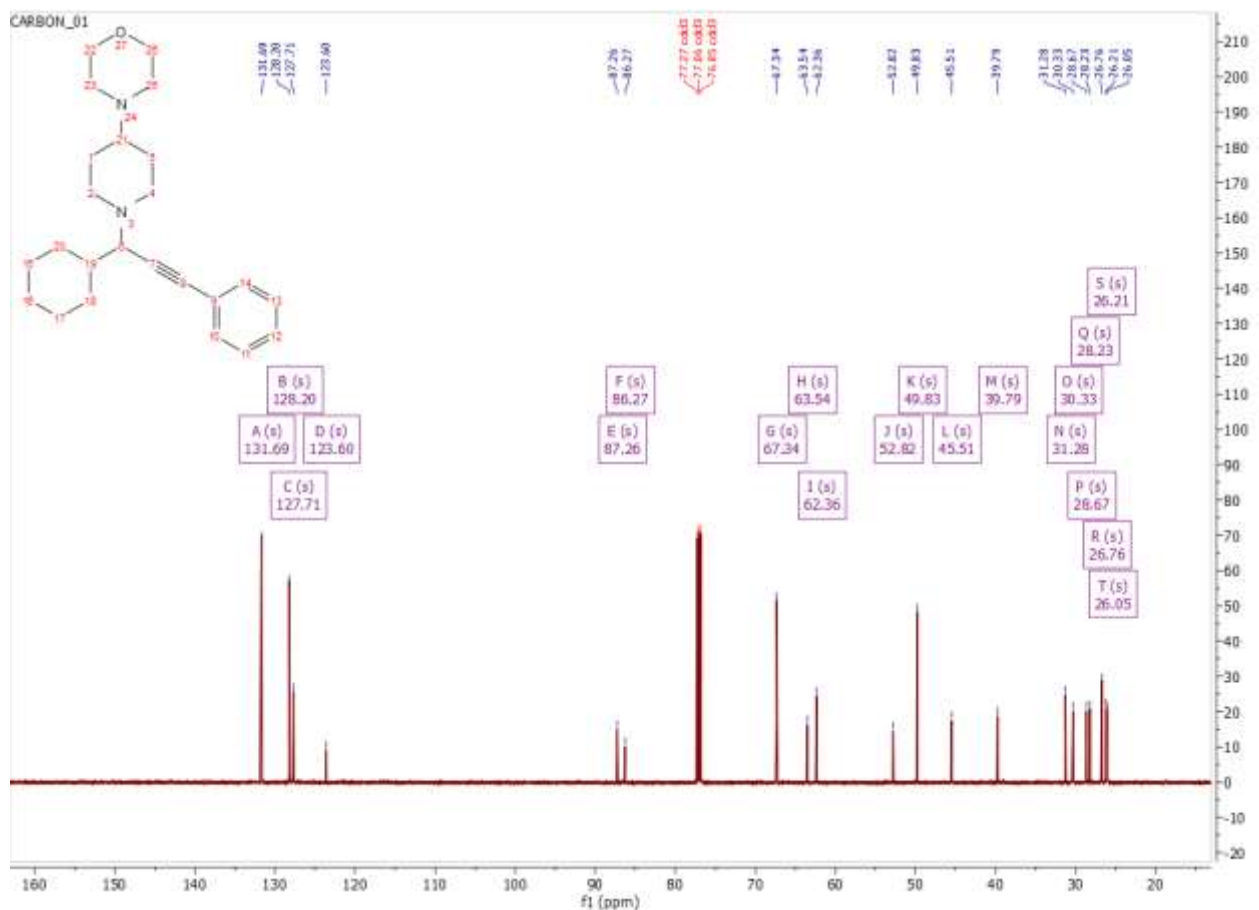

<sup>1</sup>H NMR and <sup>13</sup>C NMR for 1-[1-cyclohexyl-3-(4-ethylphenyl)prop-2-yn-1-yl] morpholine (19)

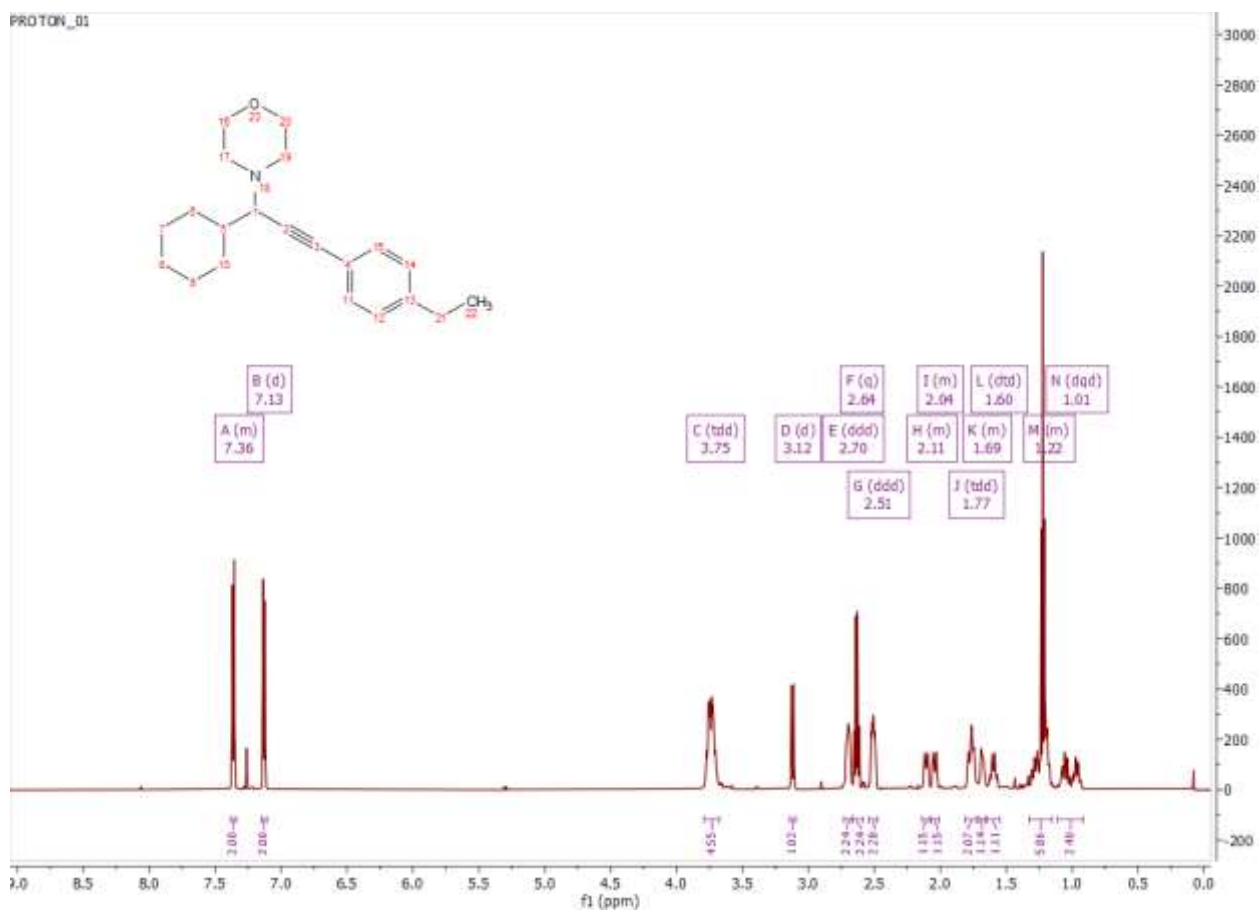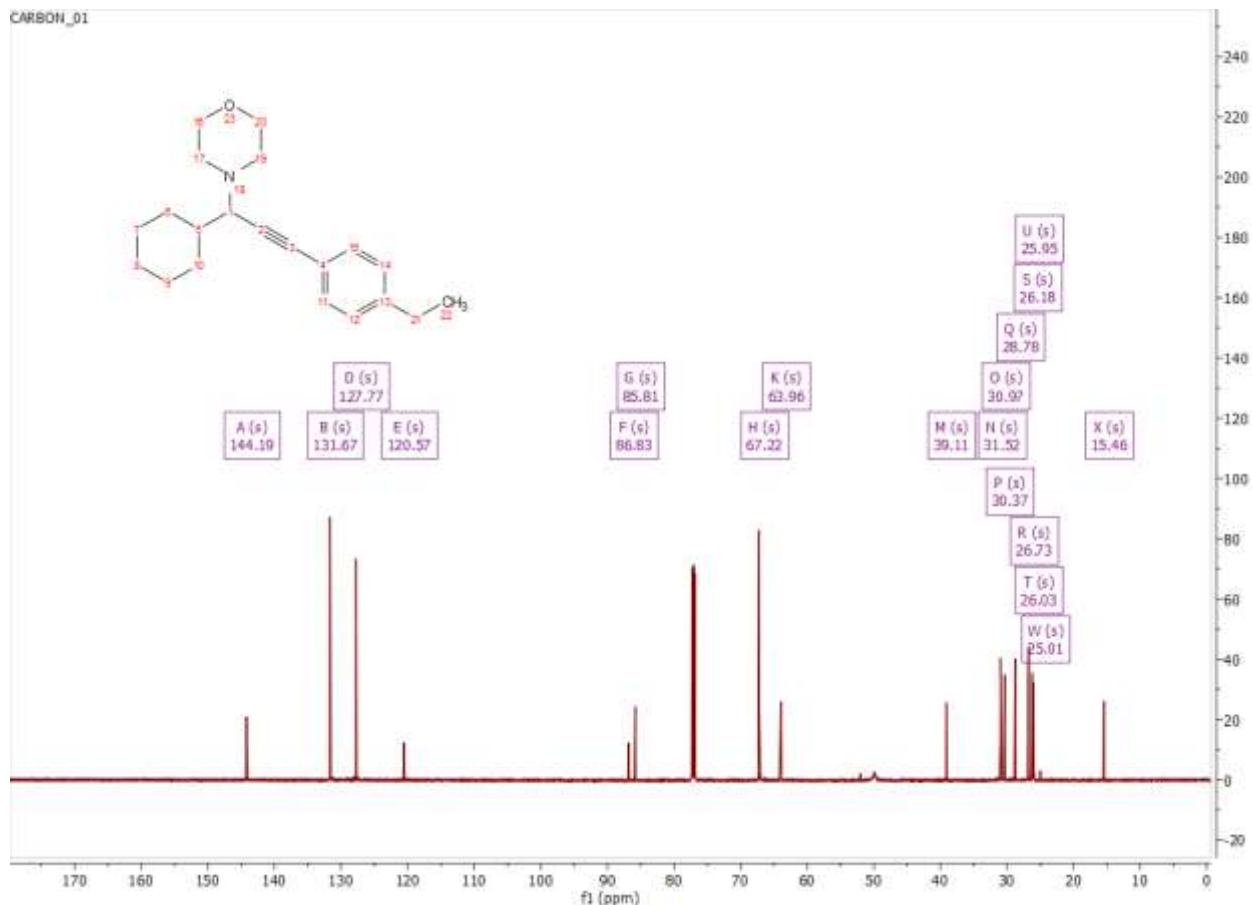

<sup>1</sup>H NMR and <sup>13</sup>C NMR for 1-[1-cyclohexyl-3-(4-ethylphenyl)prop-2-yn-1-yl] azepane(20)

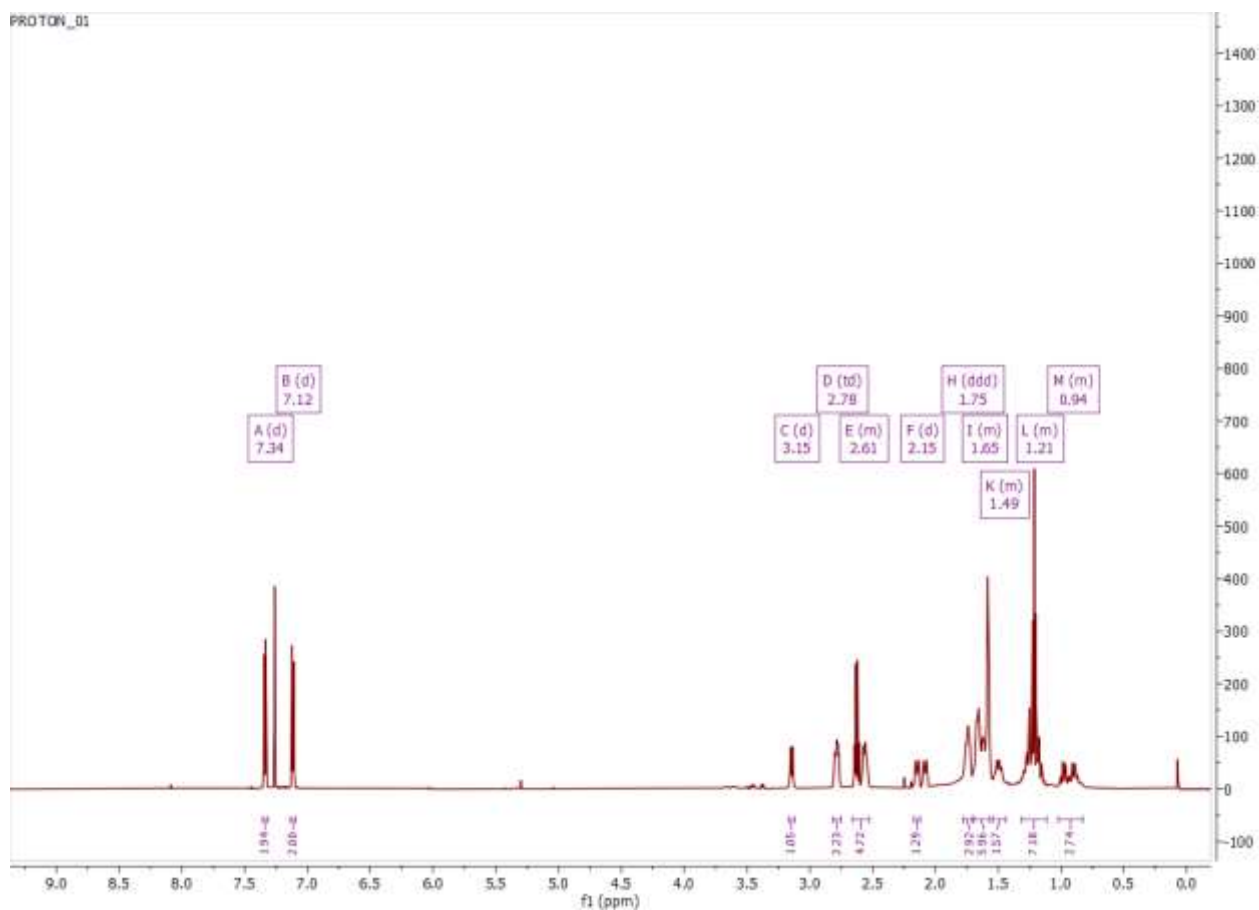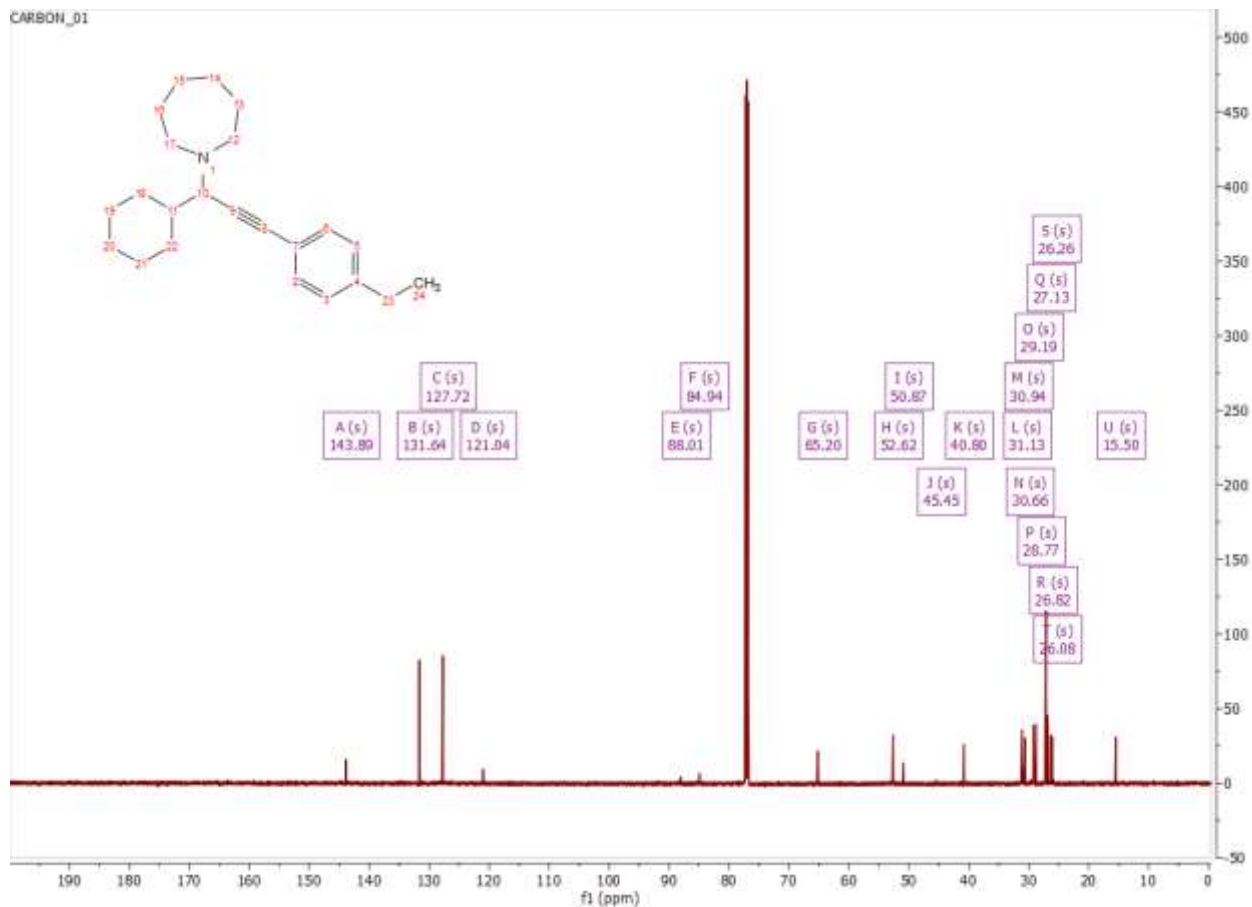

<sup>1</sup>H NMR and <sup>13</sup>C NMR for 1-[1-cyclohexyl-3-(4-methoxyphenyl)prop-2-yn-1-yl] azepane (21)

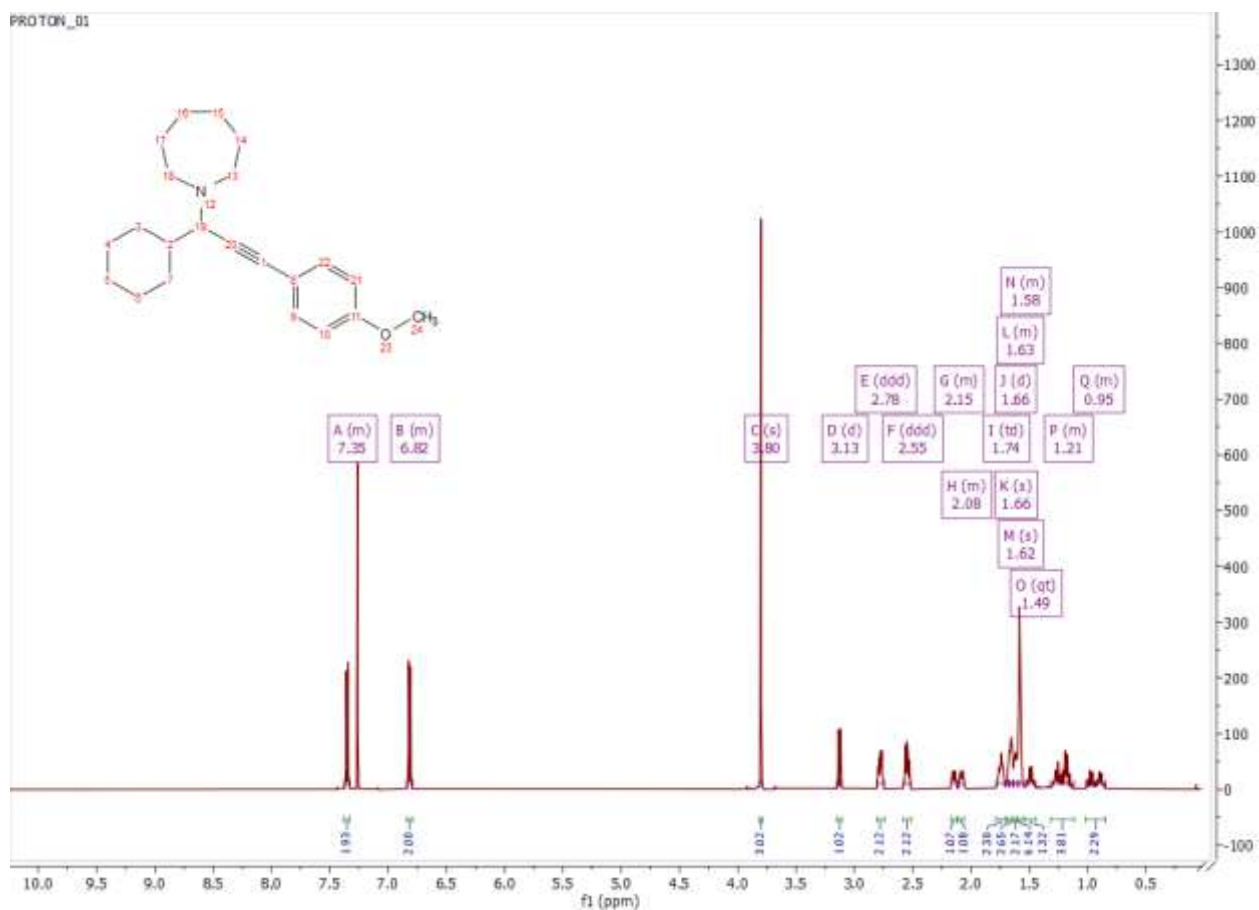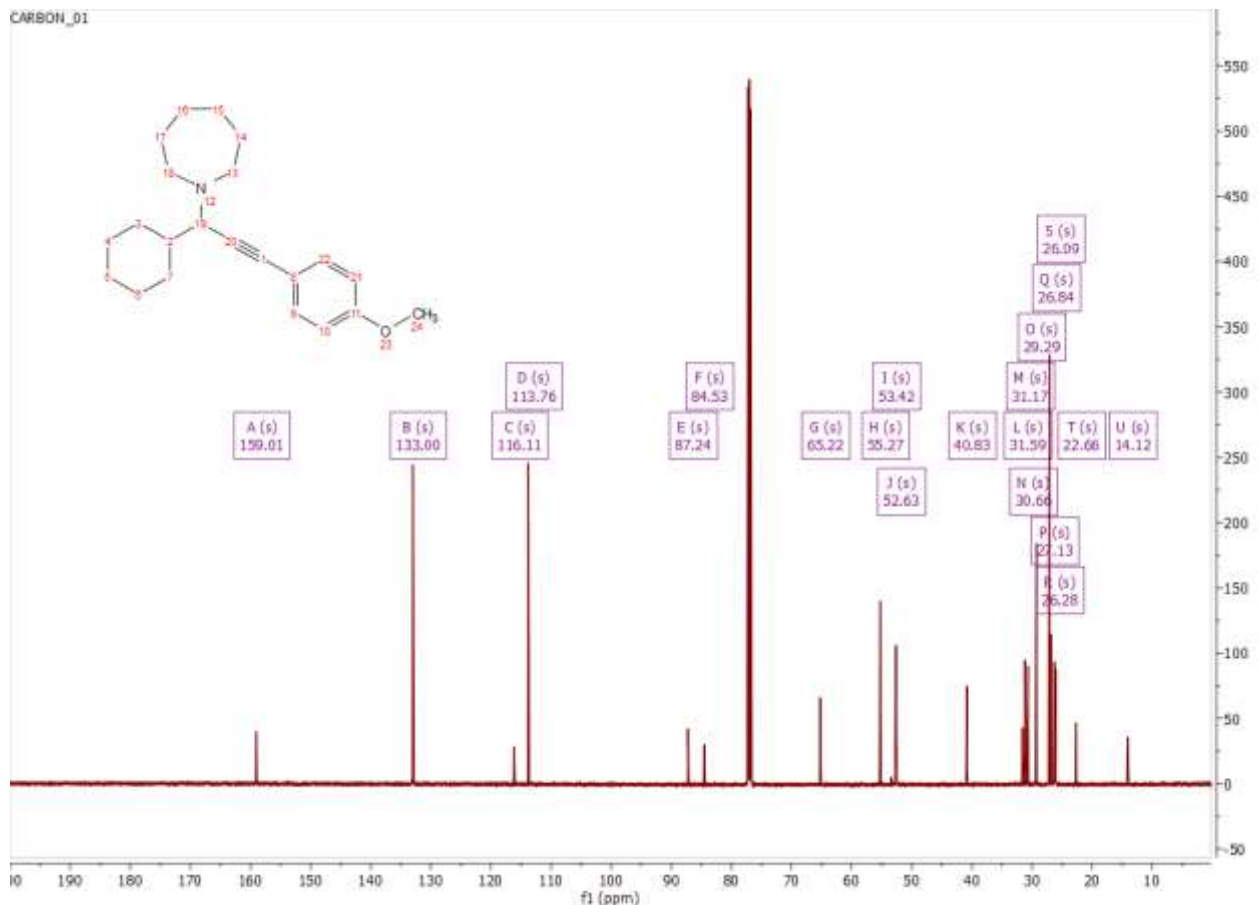

**<sup>1</sup>H NMR and <sup>13</sup>C NMR for tert-butyl N-[1-(1-cyclohexyl-3-phenylprop-2-yn-1-yl) piperidin-4-yl]carbamate (22)**

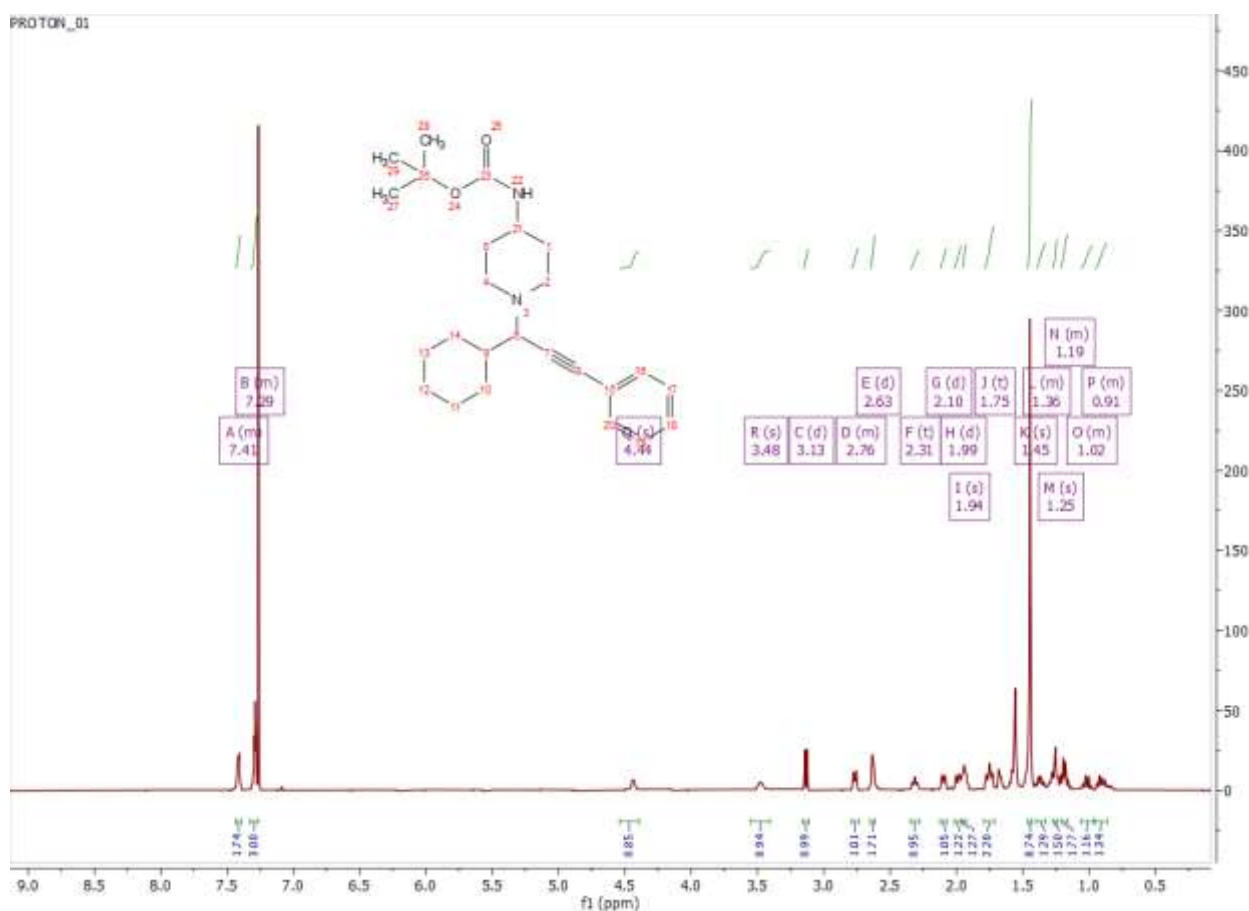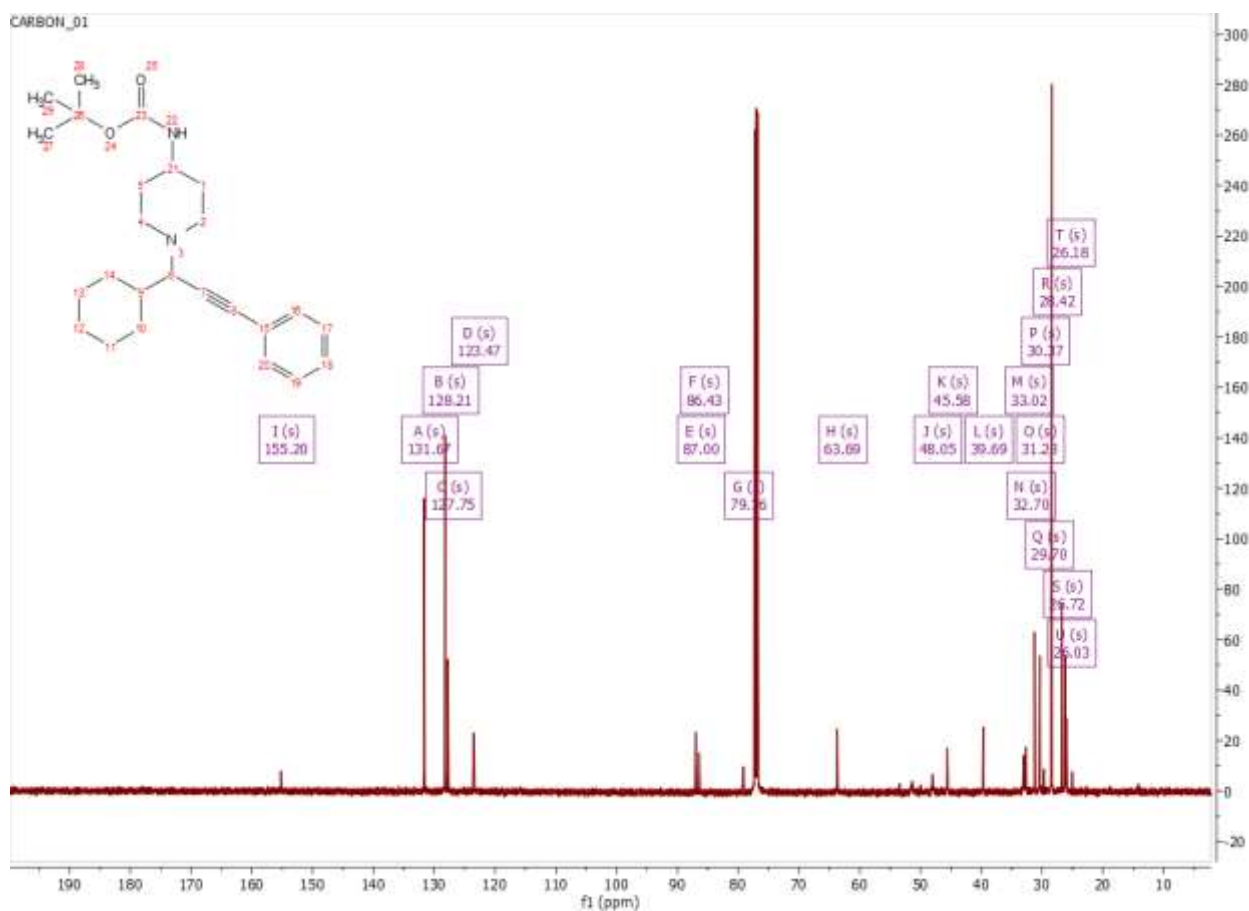

**<sup>1</sup>H NMR and <sup>13</sup>C NMR for 1-(1-cyclohexyl-3-phenylprop-2-yn-1-yl)-N,N-dimethylpiperidin-4-amine (23)**

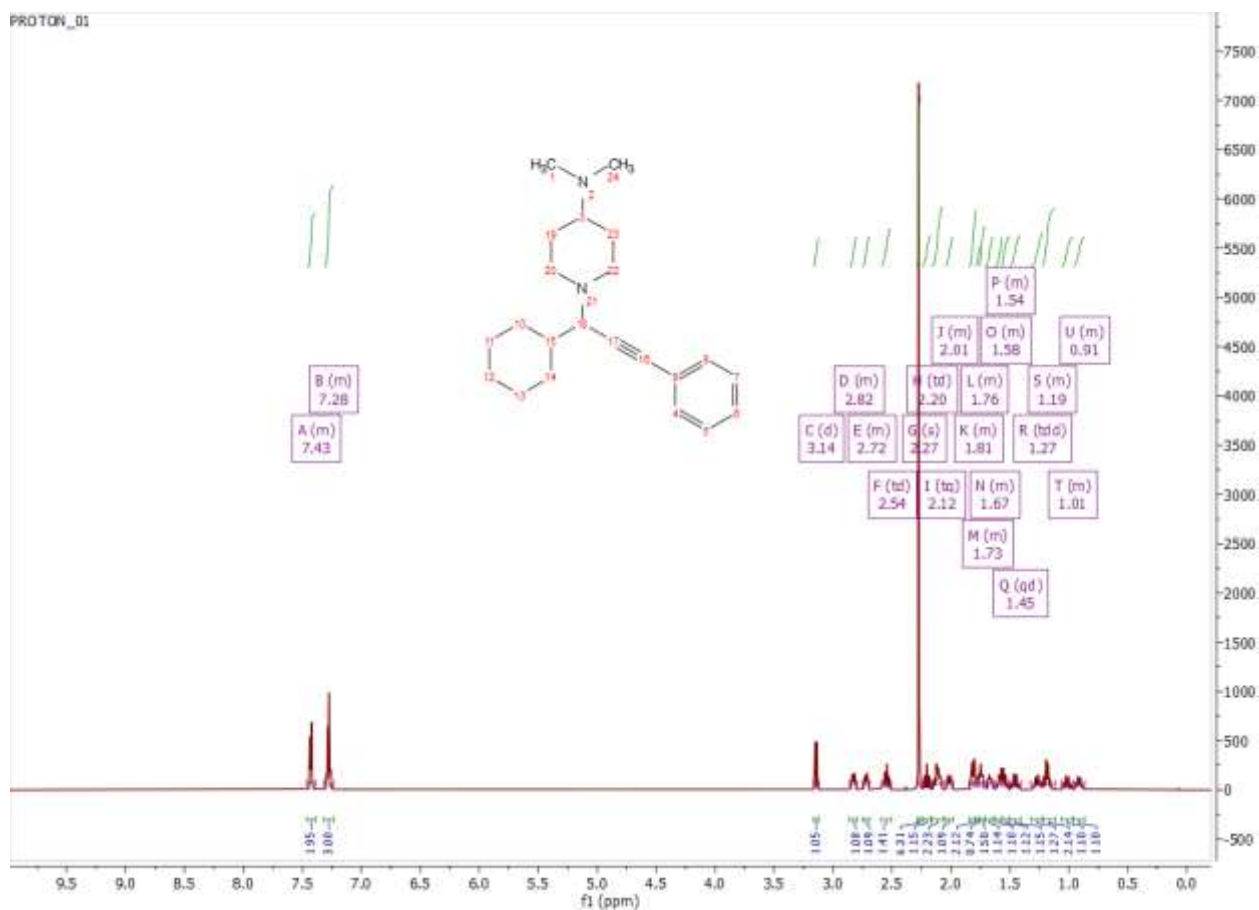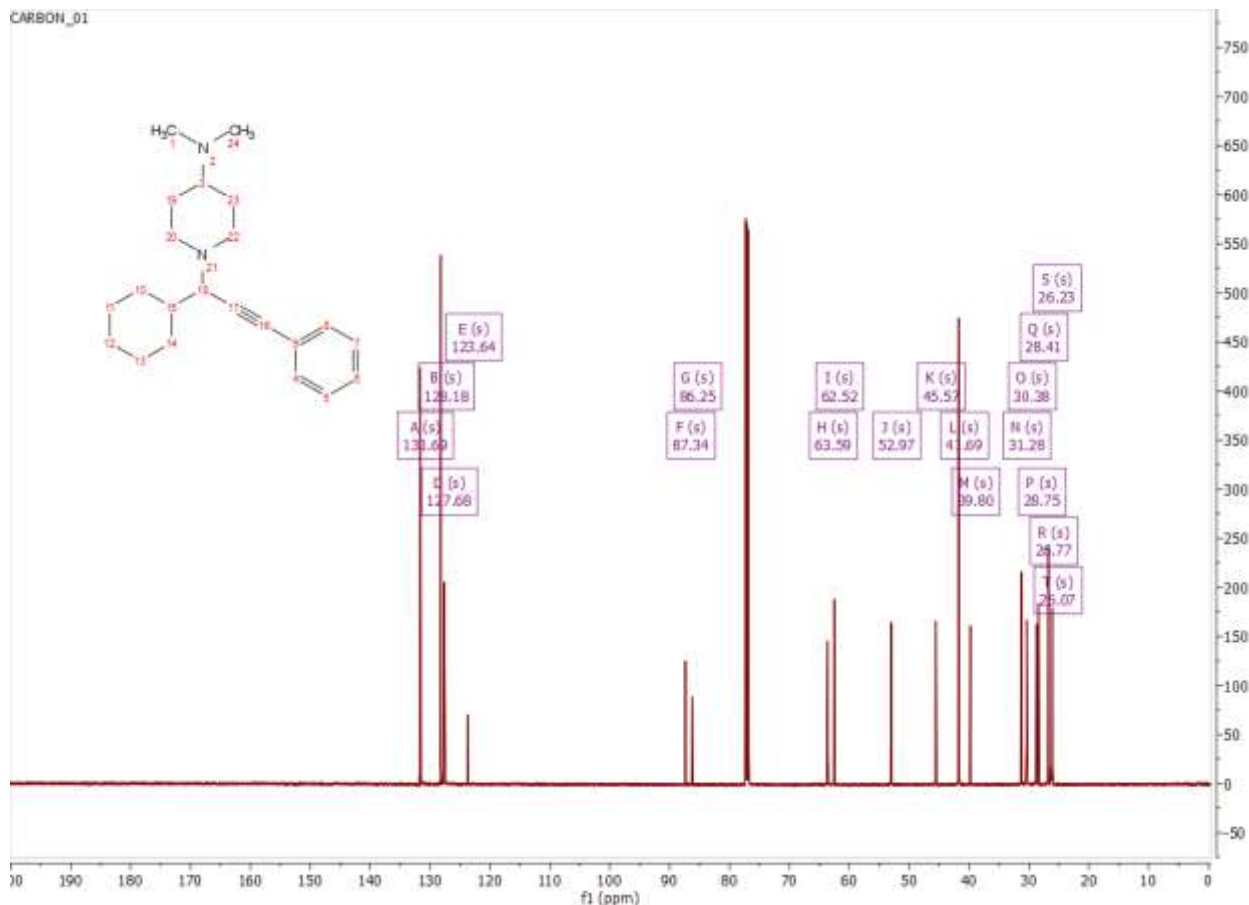



**<sup>1</sup>H NMR and <sup>13</sup>C NMR for tert-butyl N-[1-(6-chloro-1-cyclohexylhex-2-yn-1-yl) piperidin-4-yl]carbamate (24)**

PROTON\_01

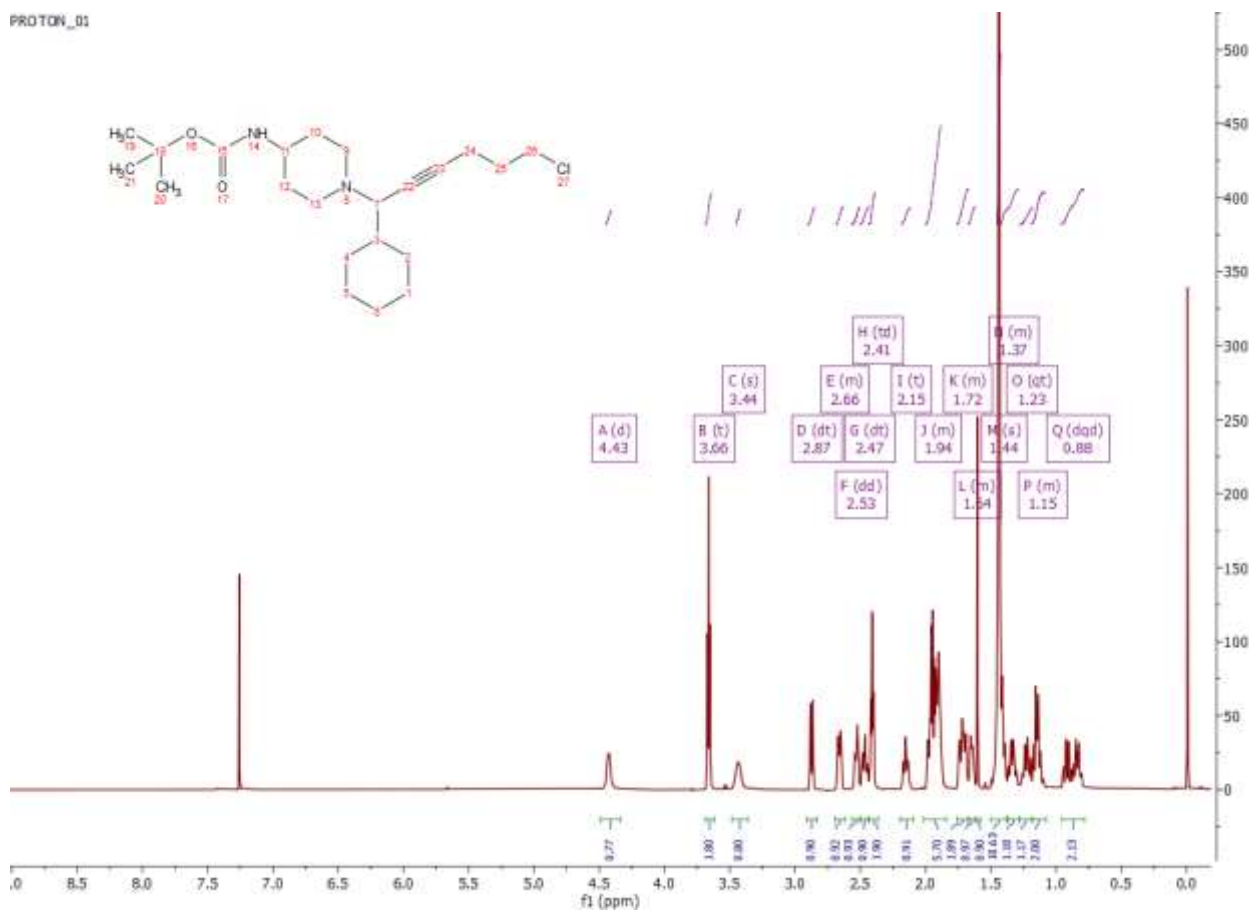

CARBON\_01

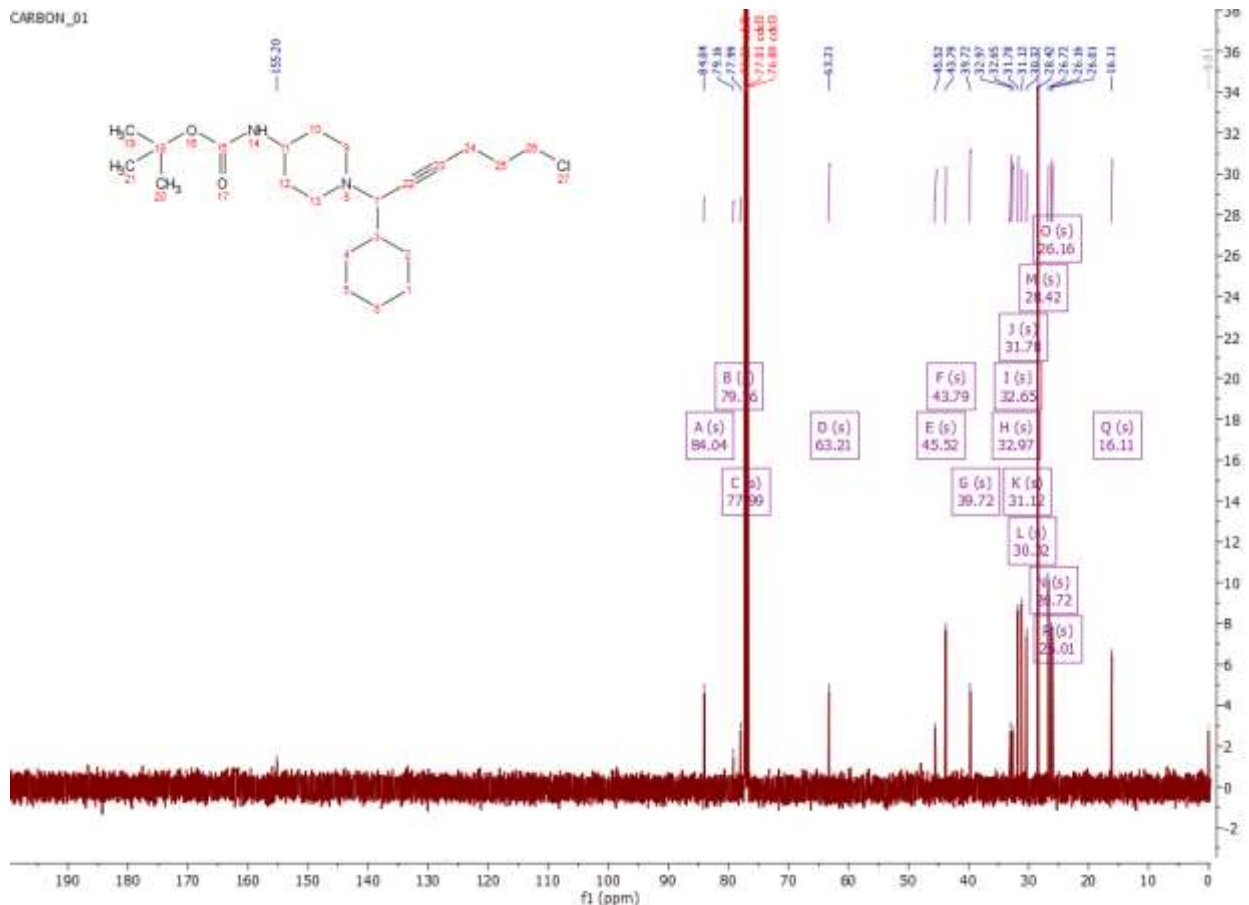

## ESI-MS Data

### 1-[3-(4-chlorophenyl)-1-cyclohexylprop-2-yn-1-yl]pyrrolidine(14)

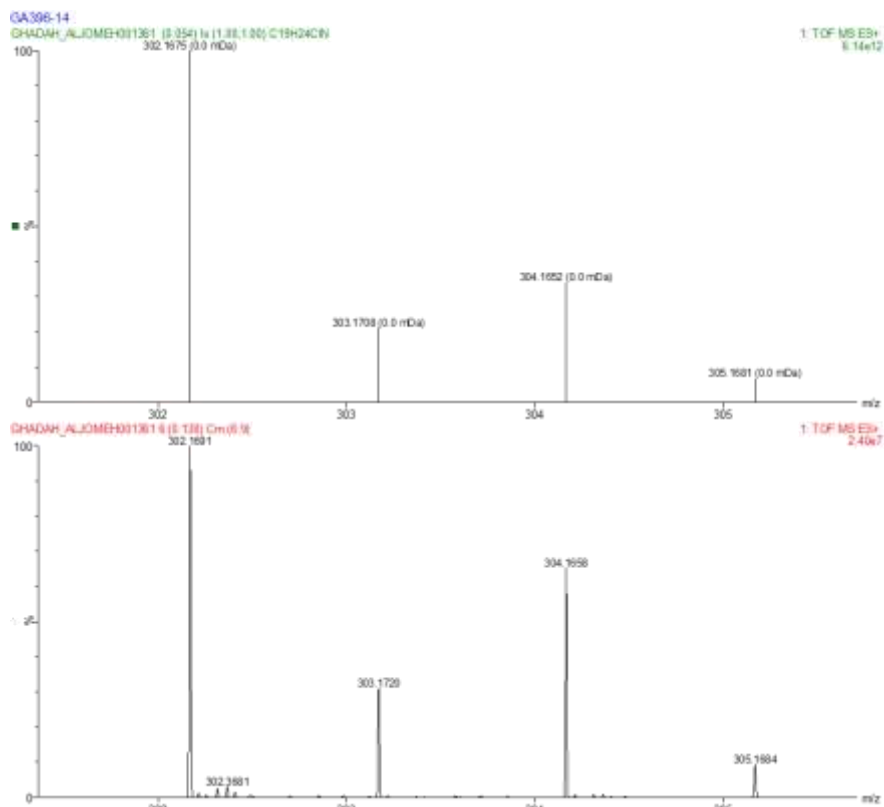

### 4-[3-(4-chlorophenyl)-1-cyclohexylprop-2-yn-1-yl]morpholine (15)

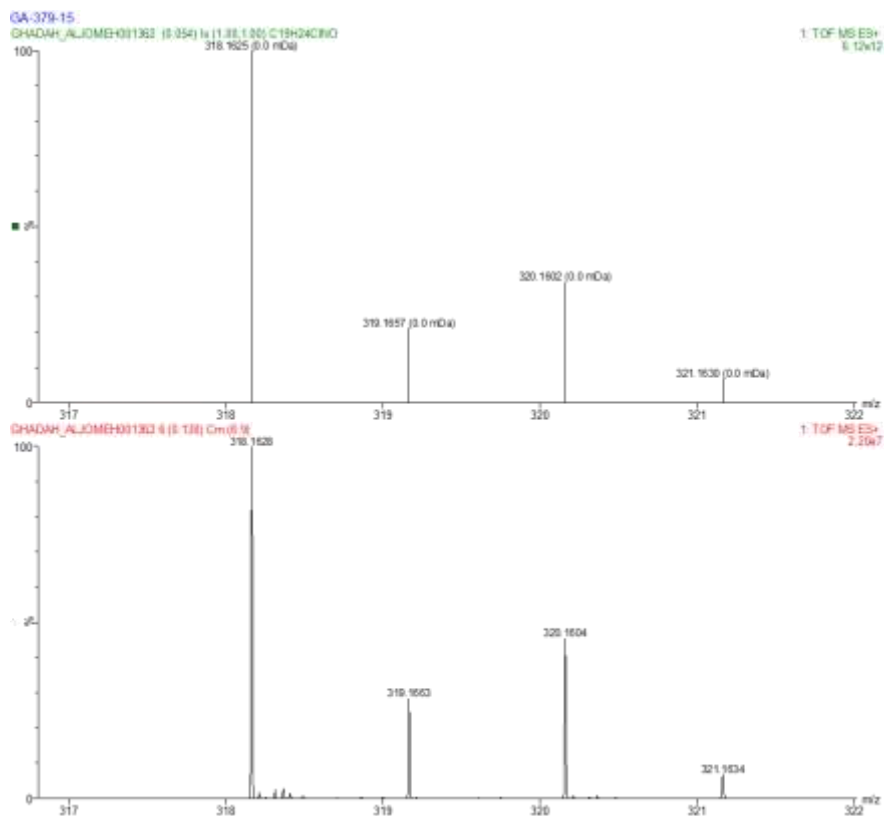

1-[3-(4-chlorophenyl)-1-cyclohexylprop-2-yn-1-yl] azepane (16)

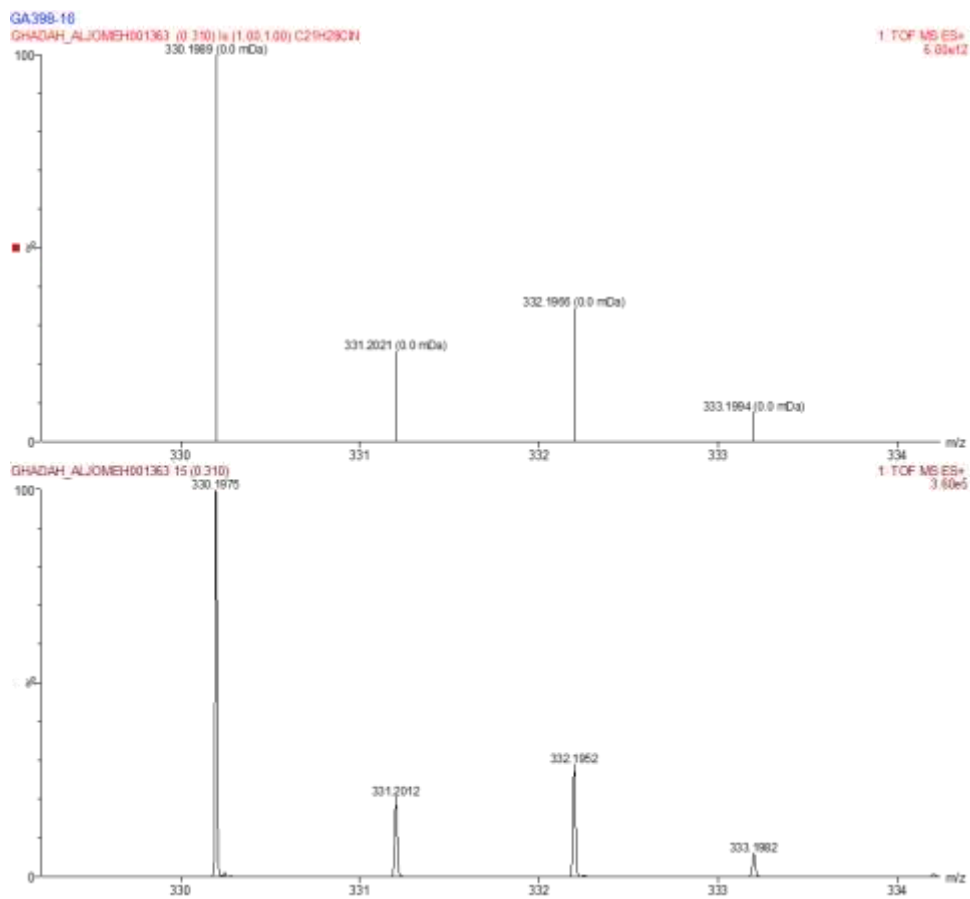

1-[1-cyclohexyl-3-(4-ethylphenyl)prop-2-yn-1-yl]pyrrolidine (17)

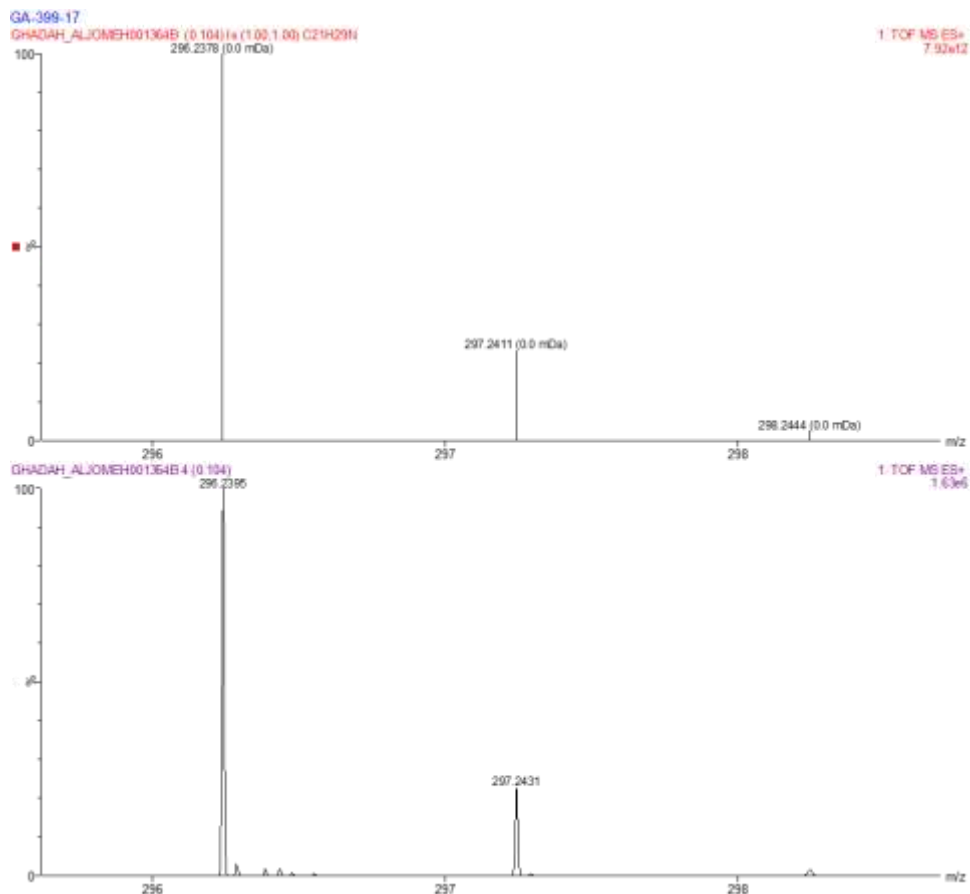

4-{1-[1-cyclohexyl-3-(4-phenylprop-2-yn-1-yl)piperidin-4-yl]morpholine (18)

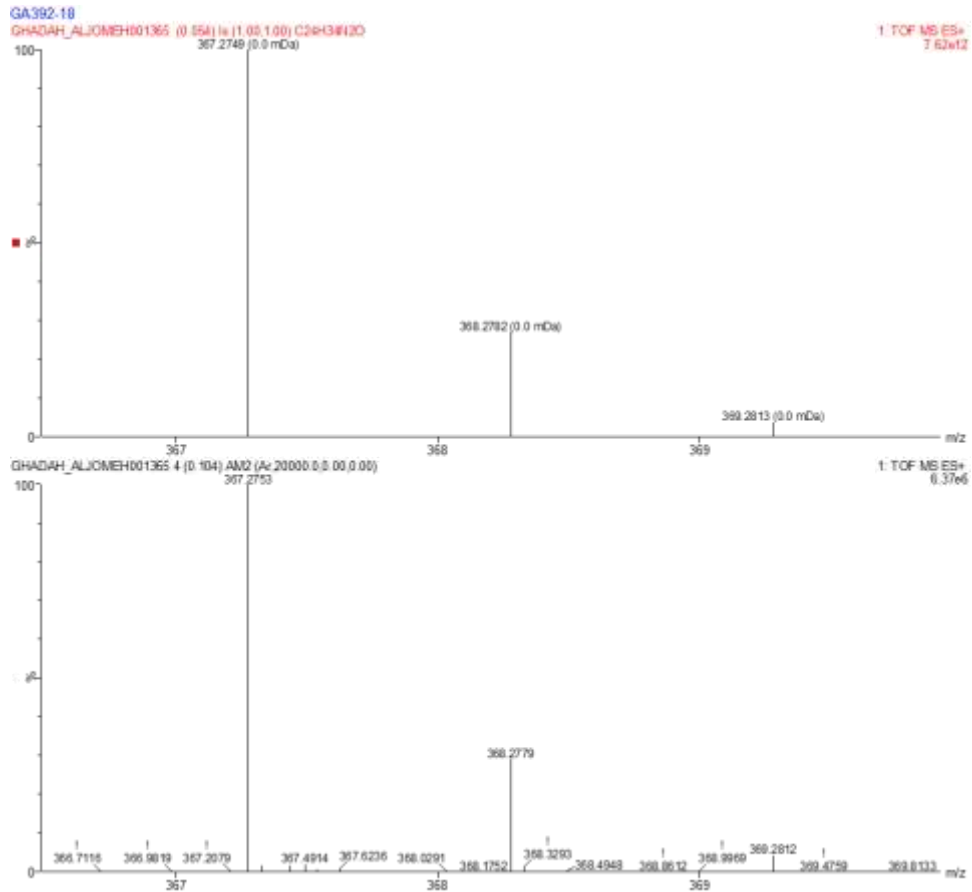

1-[1-cyclohexyl-3-(4-ethylphenyl)prop-2-yn-1-yl] morpholine (19)

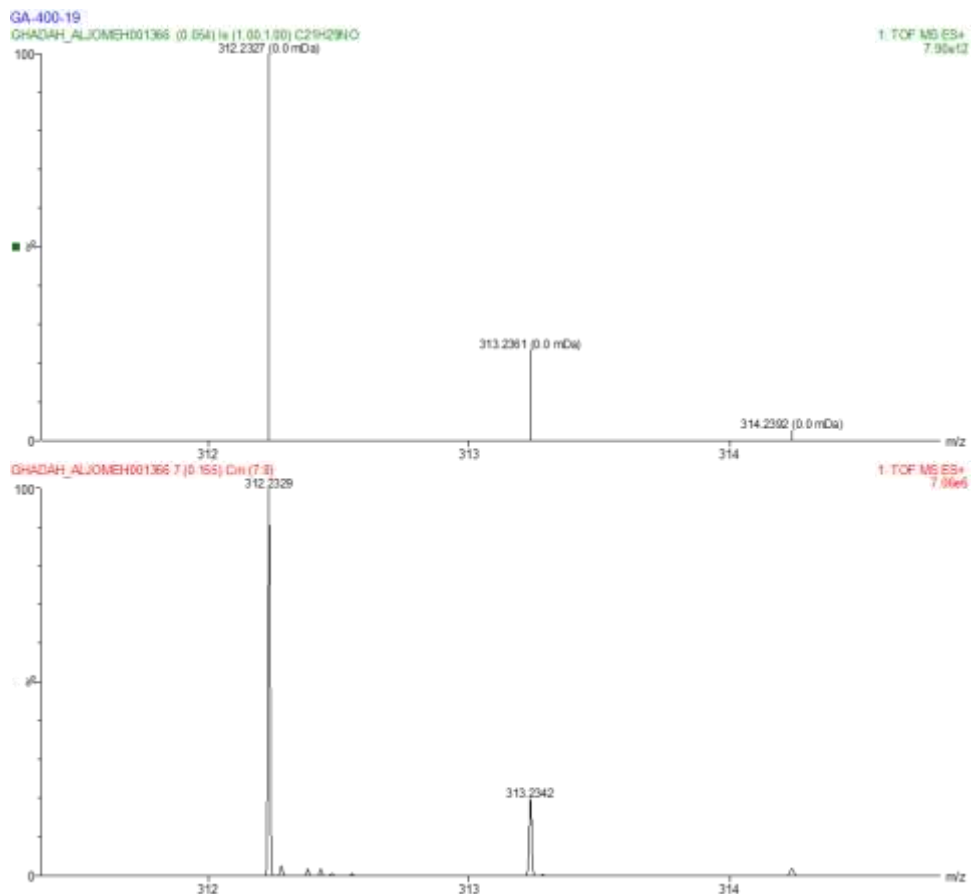

1-[1-cyclohexyl-3-(4-ethylphenyl)prop-2-yn-1-yl] azepane (20)

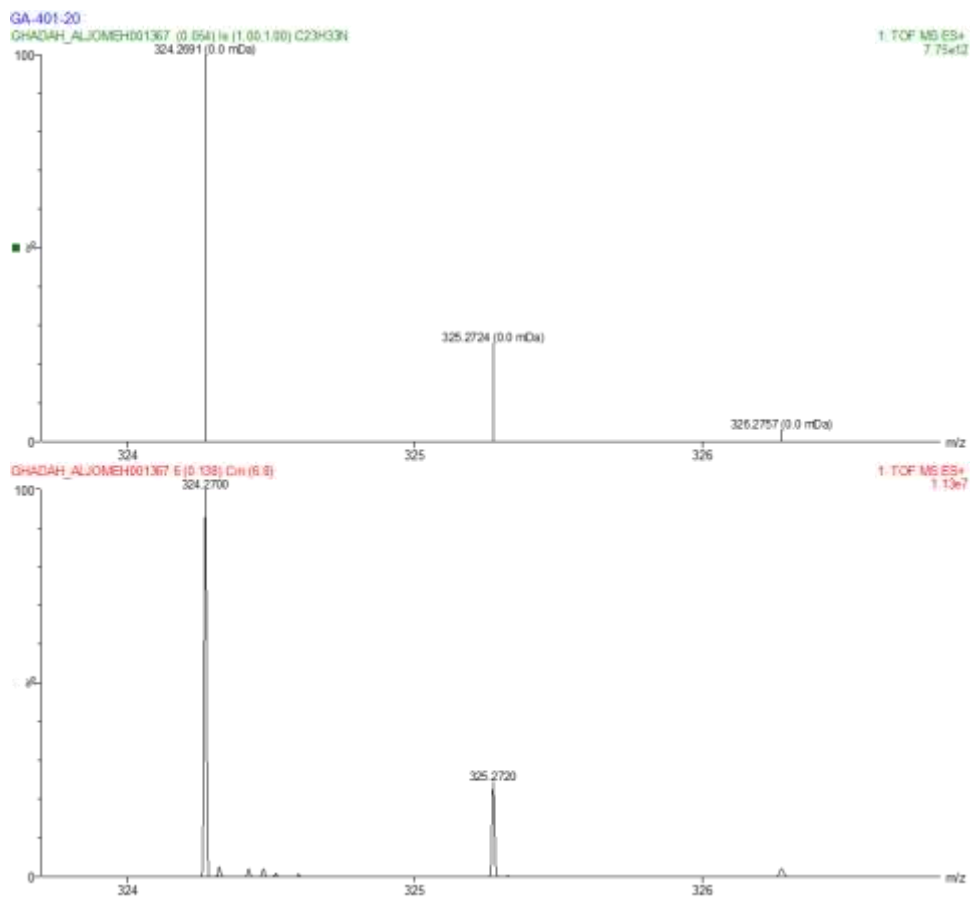

1-[1-cyclohexyl-3-(4-methoxyphenyl)prop-2-yn-1-yl] azepane (21)

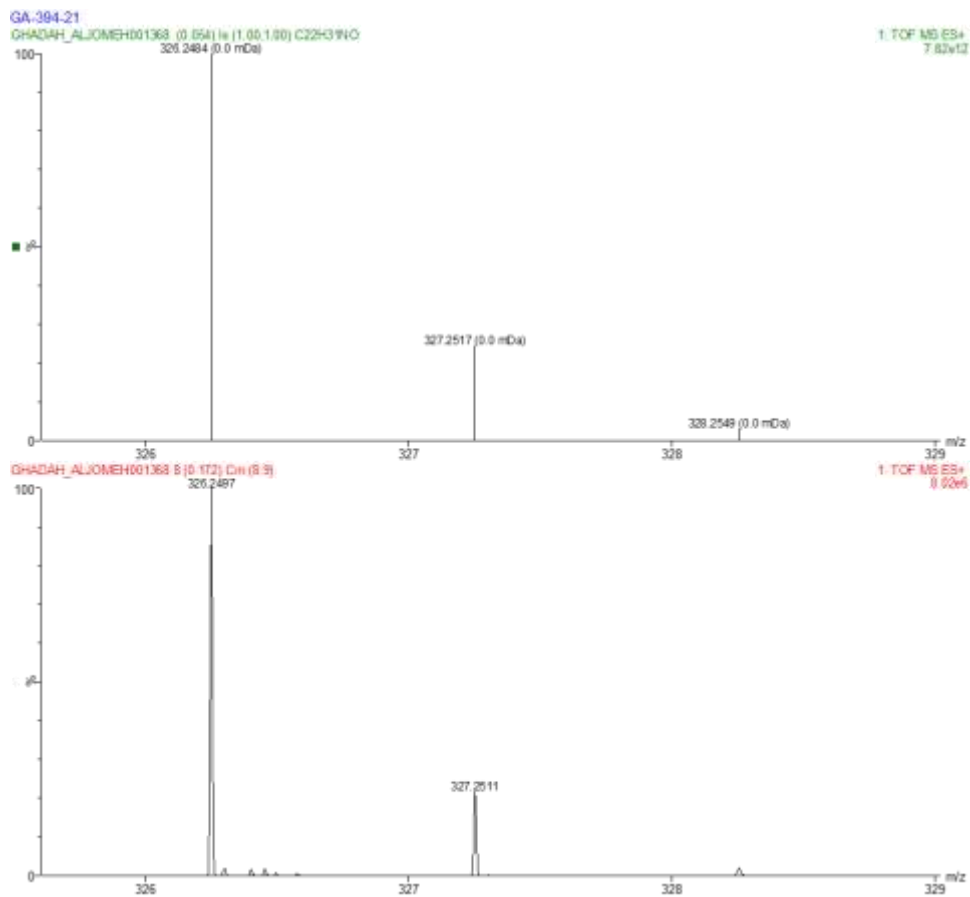

tret-butyl N-[1-(1-cyclohexyl-3-phenylprop-2-yn-1-yl) piperidin-4-yl]carbamate (22)

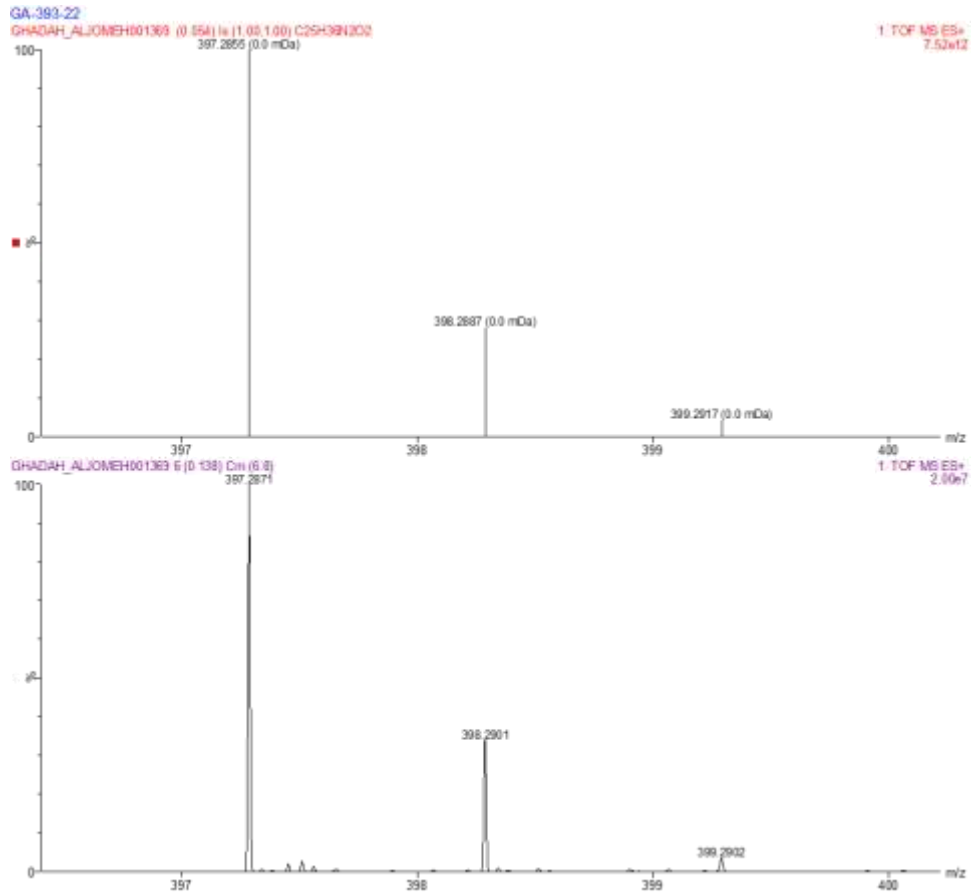

1-(1-cyclohexyl-3-phenylprop-2-yn-1-yl)-N,N-dimethylpiperidin-4-amine (23)

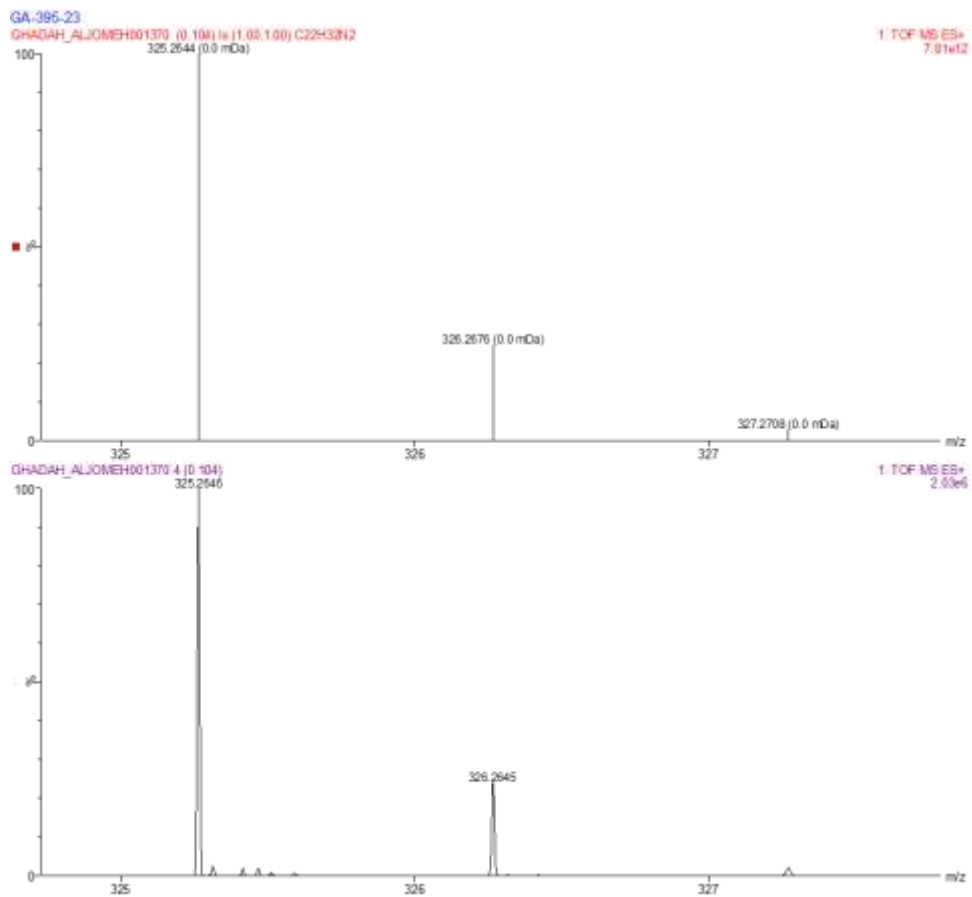

tert-butyl N-[1-(6-chloro-1-cyclohexylhex-2-yn-1-yl) piperidin-4-yl]carbamate (24)

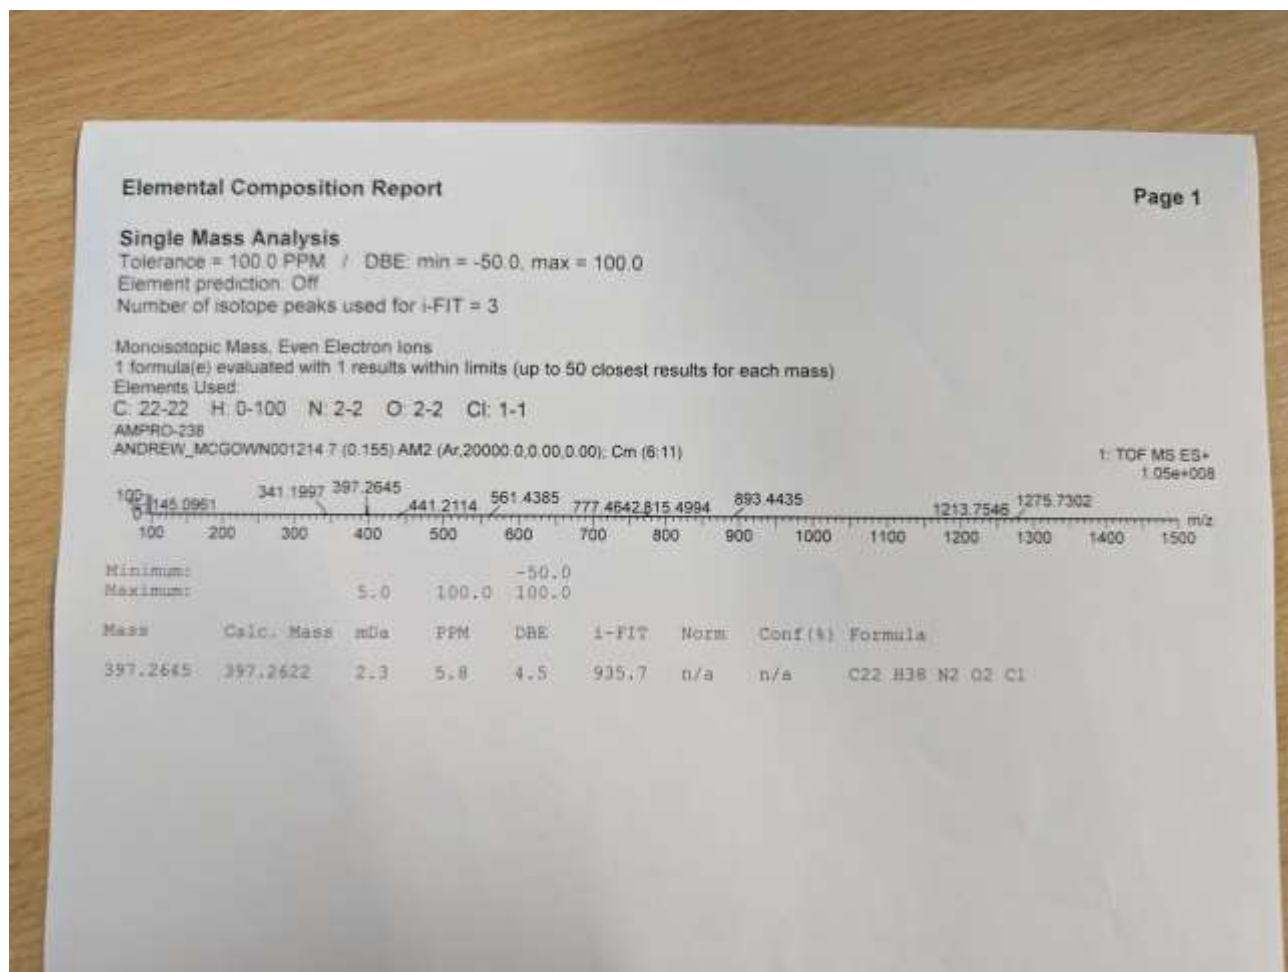

Supplement: d3su00315a1.pdf [file d3su00315a1.pdf]
